# Supplementary material for: Electrooxidation-induced selective cleavage of C–N bonds of tertiary amines to access thioureas, selenoureas, and 2-aminated benzoselenazoles
Source: Royal Society of Chemistry journal article supplement (doi:10.1039/d2qo01394k), 2022-01-01
Supplement: d2qo01394k1.pdf [file d2qo01394k1.pdf]

**Electrooxidation-induced Selective Cleavage of C–N Bonds of Tertiary Amines to Access Thioureas, Selenoureas, and 2-Aminated Benzoselenazoles**

Ting Zeng,<sup>a</sup> Jianjing Yang,<sup>\*a</sup> Kelu Yan,<sup>a</sup> Shibo Wang,<sup>b</sup> Shuyun Zhu,<sup>a</sup> Xian-En Zhao,<sup>a</sup> Dandan Li<sup>a</sup>  
Jiangwei Wen<sup>\*a</sup>

<sup>a</sup> Key Laboratory of Green Natural Products and Pharmaceutical Intermediates in Colleges and Universities of Shandong Province, School of Chemistry and Chemical Engineering, Qufu Normal University, 273165, P. R. China.

<sup>b</sup> Institute of Smart Biomaterial Materials, School of Materials Science and Engineering, Zhejiang Sci-Tech University, Hanzhou 310018, P. R. China.

<sup>c</sup> Key Laboratory of Micro-Nano Materials for Energy Storage and Conversion of Henan Province, Institute of Surface Micro and Nano Materials, College of Chemical and Materials Engineering, Xuchang University, Henan 461000, P. R. China.

E-mail: [wenjy@qfnu.edu.cn](mailto:wenjy@qfnu.edu.cn)

**Contents**

|                                                                                                                                                                                                     |     |
|-----------------------------------------------------------------------------------------------------------------------------------------------------------------------------------------------------|-----|
| 1. General information                                                                                                                                                                              | S2  |
| 2. General procedure for electrooxidation-induced selective cleavage of C-N bonds of tertiary amines to access asymmetric thioureas, selenoureas, and 2-aminealkylated benzoselenazole derivatives. | S2  |
| 3. Large-scale synthesis of 1c and synthesis with battery                                                                                                                                           | S3  |
| 4. Preliminary mechanistic studies                                                                                                                                                                  | S4  |
| (1) Radical trapping experiments                                                                                                                                                                    | S4  |
| (2) CV experiments                                                                                                                                                                                  | S5  |
| 5. References                                                                                                                                                                                       | S5  |
| 6. Detail descriptions for products                                                                                                                                                                 | S6  |
| 7. Copies of product NMR and HRMS Spectra                                                                                                                                                           | S19 |

## 1. General information

All glassware was oven dried at 100 °C for hours and cooled down under vacuum. Isoselenocyanatobenzene and 1-iodo-2-isoselenocyanatobenzene derivatives were prepared according to reported procedures.<sup>1</sup> All the reaction prepared using the solvent of CH<sub>3</sub>CN, DCM, and acetone (AR, 99.0%) was purchased from Macklin. Unless otherwise noted, materials were obtained from commercial suppliers and used without further purification. The instrument for electrolysis is dual display potentiostat (DJS-292B or SS-L303SPD) (made in China), the carbon rod ( $\phi = 6$  mm), Pt plates (1 x 1 cm<sup>2</sup>), and Ni plates (1 x 1 cm<sup>2</sup>) was purchased from Xuzhou Xinke Instrument and Meter Co. LTD. The thin layer chromatography (TLC) employed glass 0.25 mm silica gel plates. Flash chromatography columns were packed with 200-300 mesh silica gel in petroleum (b. p. 60-90 °C). <sup>1</sup>H, <sup>13</sup>C and <sup>19</sup>F NMR data were recorded with Bruker Advance III (400 or 500 MHz) spectrometers with tetramethylsilane as an internal standard. All chemical shifts ( $\delta$ ) are reported in ppm and coupling constants ( $J$ ) in Hz. All chemical shifts are reported relative to tetramethylsilane and *d*-solvent peaks (77.00 ppm, chloroform, 40.0 ppm, DMSO-*d*<sub>6</sub>), respectively.

## 2. General procedure for electrooxidation-induced selective cleavage of C-N bonds of tertiary amines to access asymmetric thioureas, selenoureas, and 2-aminealkylated benzoselenazole derivatives.

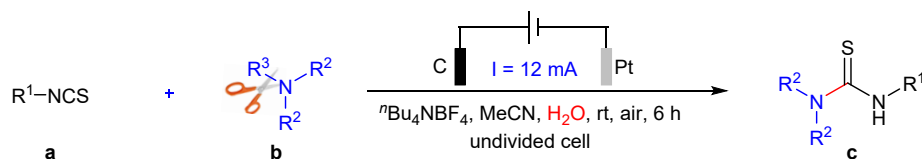

In an oven-dried undivided three-necked flask (25 mL) equipped with a stir bar, **a** (0.5 mmol), **b** (1.5 mmol), and <sup>n</sup>Bu<sub>4</sub>NBF<sub>4</sub> (1.0 mmol, 330.0 mg) were combined. The flask was equipped with a carbon rods ( $\phi = 6$  mm) as the anode and Pt plates (1.0 × 1.0 cm<sup>2</sup>) as the cathode. Under the air, CH<sub>3</sub>CN (8.0 mL) and H<sub>2</sub>O (0.6 mL) were slowly injected into the reaction flask. The reaction mixture was stirred and electrolyzed at a constant current of 12 mA under room temperature for 6 h. When the reaction was finished, the reaction mixture was washed with water and extracted with CH<sub>2</sub>Cl<sub>2</sub> (10 mL × 3). The organic layers were combined, dried over Na<sub>2</sub>SO<sub>4</sub>, and concentrated. The pure product was obtained by flash column chromatography on silica gel.

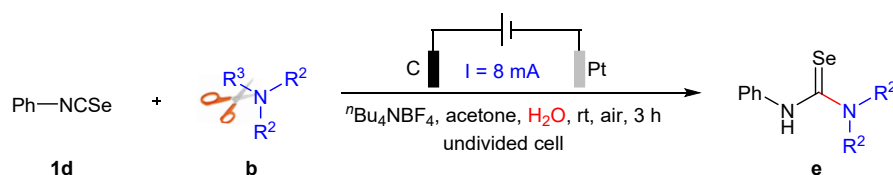

In an oven-dried undivided three-necked flask (25 mL) equipped with a stir bar, **1d** (0.5 mmol, 91.5 mg), **b** (1.5 mmol), and <sup>n</sup>Bu<sub>4</sub>NBF<sub>4</sub> (1.0 mmol, 330.0 mg) were combined. The flask was equipped with a carbon rods ( $\phi = 6$  mm) as the anode and Pt plates (1.0 × 1.0 cm<sup>2</sup>) as the cathode. Under the air, acetone

(8.0 mL) and H<sub>2</sub>O (0.6 mL) were slowly injected into the reaction flask. The reaction mixture was stirred and electrolyzed at a constant current of 8 mA under room temperature for 3 h. When the reaction was finished, the reaction mixture was washed with water and extracted with CH<sub>2</sub>Cl<sub>2</sub> (10 mL × 3). The organic layers were combined, dried over Na<sub>2</sub>SO<sub>4</sub>, and concentrated. The pure product was obtained by flash column chromatography on silica gel.

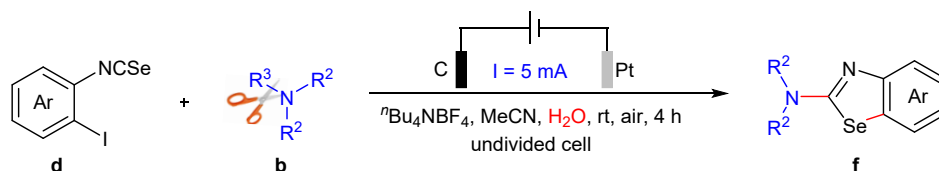

In an oven-dried undivided three-necked flask (25 mL) equipped with a stir bar, **d** (0.5 mmol), **b** (1.5 mmol), and <sup>n</sup>Bu<sub>4</sub>NBF<sub>4</sub> (1.0 mmol, 330.0 mg) were combined. The flask was equipped with a carbon rods (ϕ = 6 mm) as the anode and Pt plates (1.0 × 1.0 cm<sup>2</sup>) as the cathode. Under the air, acetone (8.0 mL) and H<sub>2</sub>O (0.6 mL) were slowly injected into the reaction flask. The reaction mixture was stirred and electrolyzed at a constant current of 5 mA under room temperature for 4 h. When the reaction was finished, the reaction mixture was washed with water and extracted with CH<sub>2</sub>Cl<sub>2</sub> (10 mL × 3). The organic layers were combined, dried over Na<sub>2</sub>SO<sub>4</sub>, and concentrated. The pure product was obtained by flash column chromatography on silica gel.

### 3. Large-scale synthesis of **1c** and synthesis with battery

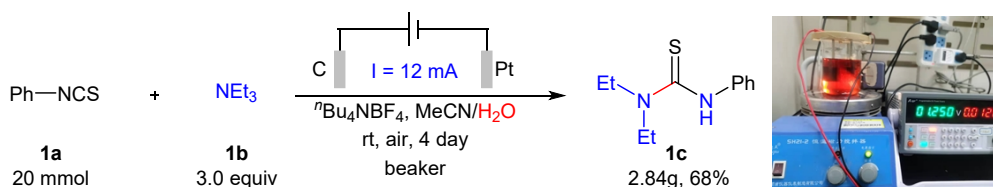

In an oven-dried beaker (500 mL) equipped with a stir bar, **1a** (20.0 mmol, 2.70 g), **1b** (30.0 mmol, 3.03 g), and <sup>n</sup>Bu<sub>4</sub>NBF<sub>4</sub> (40.0 mmol, 13.2 g) were combined. The beaker was equipped with a carbon felt (2.0 × 2.0 cm<sup>2</sup>) as the anode and Pt plates (1.0 × 1.0 cm<sup>2</sup>) as the cathode. Under the air, CH<sub>3</sub>CN (320.0 mL) and H<sub>2</sub>O (24.0 mL) were slowly injected into the reaction system. The reaction mixture was stirred and electrolyzed at a constant current of 12 mA under room temperature for 96 h. When the reaction was finished, the reaction mixture was concentrated, and then extracted with CH<sub>2</sub>Cl<sub>2</sub> (10 mL × 3). The organic layers were combined, dried over Na<sub>2</sub>SO<sub>4</sub>, and concentrated again. The pure product **1c** was obtained in a yield of 68% by flash column chromatography on silica gel.

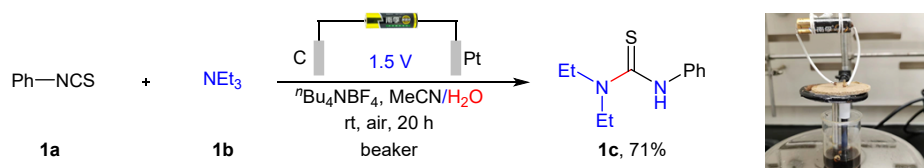

In an oven-dried beaker (25 mL) equipped with a stir bar, **1a** (0.5 mmol, 67.5 mg), **b** (1.5 mmol, 151.1

mg), and  ${}^n\text{Bu}_4\text{NBF}_4$  (1.0 mmol, 330.0 mg) were combined. The beaker was equipped with a carbon rods ( $\phi = 6$  mm) as the anode and Pt plates ( $1.0 \times 1.0$  cm $^2$ ) as the cathode. Under the air,  $\text{CH}_3\text{CN}$  (8.0 mL) and  $\text{H}_2\text{O}$  (0.6 mL) were slowly injected into the reaction system. The reaction mixture was stirred and electrolyzed at 1.5-volt battery as the sole power supply under room temperature for 20 h. When the reaction was finished, the pure product **1c** was obtained in a yield of 71% by flash column chromatography on silica gel.

#### 4. Preliminary mechanistic studies

##### 4.1 Radical trapping experiments

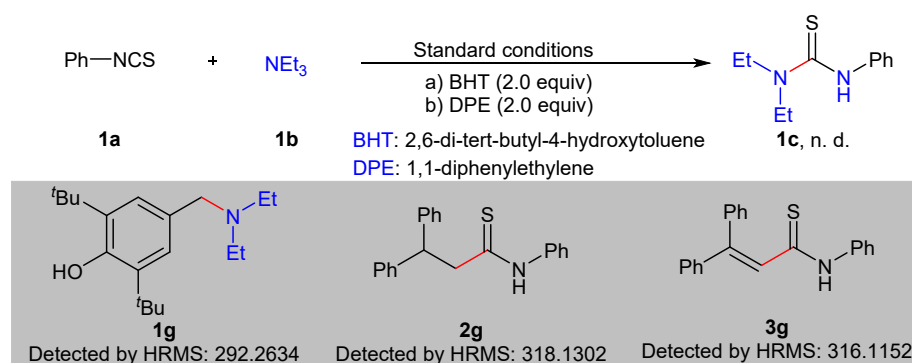

In an oven-dried undivided three-necked flask (25 mL) equipped with a stir bar, **1a** (0.5 mmol, 67.5 mg), **1b** (1.5 mmol, 151.1 mg)  ${}^n\text{Bu}_4\text{NBF}_4$  (1.0 mmol, 330.0 mg), and BHT (1.5 mmol, 330.0 mg) or DPE (1.5 mmol, 270.0 mg) were combined. The flask was equipped with a carbon rods ( $\phi = 6$  mm) as the anode and Pt plates ( $1.0 \times 1.0$  cm $^2$ ) as the cathode. Under the air,  $\text{CH}_3\text{CN}$  (8.0 mL) and  $\text{H}_2\text{O}$  (0.6 mL) were slowly injected into the reaction flask. The reaction mixture was stirred and electrolyzed at a constant current of 12 mA under room temperature for 6 h. When the reaction was finished, the solution was concentrated in a vacuum and not detected the desired product **1c**. The compounds **1g-3g** can be detected by HRMS.

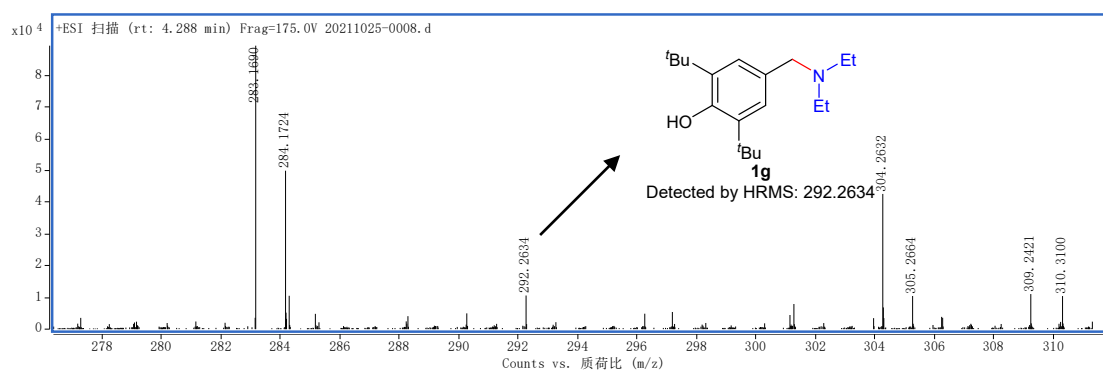

Figure S1. HRMS results of **1g**.

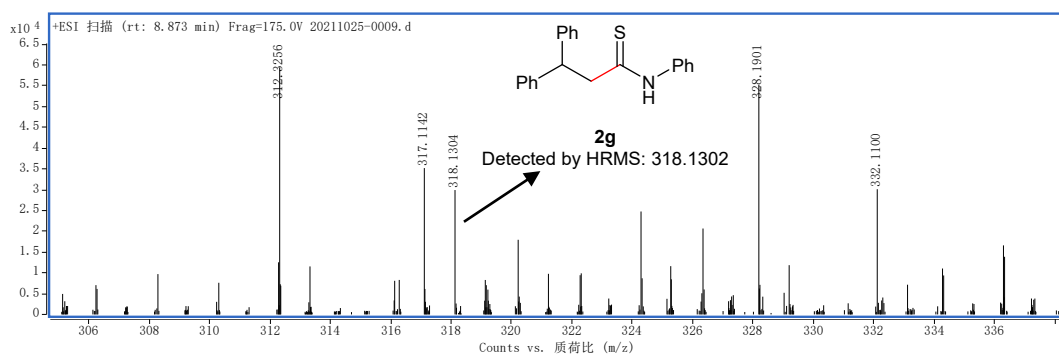

**Figure S2.** HRMS results of **2g**.

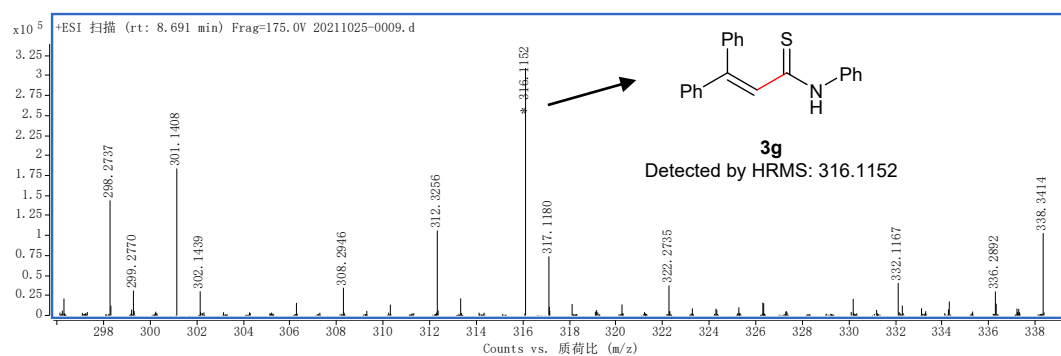

**Figure S3.** HRMS results of **3g**.

## 4.2 CV experiments

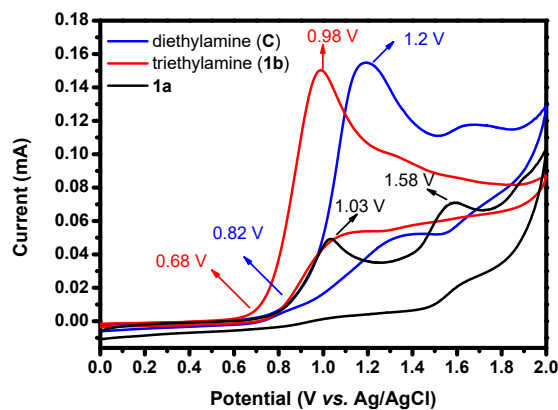

**Fig. S4.** Cyclic voltammograms at grass carbon as work electrode, Ag/AgCl as the reference electrode, Pt (1 x 1 cm<sup>2</sup>) as counter electrode in 0.1 M <sup>n</sup>Bu<sub>4</sub>NBF<sub>4</sub>, **C** (0.25 mM), **1b** (0.25 mM), **1a** (0.25 mM) in CH<sub>3</sub>CN, scan rate 100 mV/s.

## 5. References

- (a) Takemoto, Y.; Nanjo, T.; Tsukano, C., *Synlett.* **2014**, 25, 1473-1477; (b) Zhou, M.; Ji, S.; Wu, Z.; Li, Y.; Zheng, W.; Zhou, H.; Chen, T., *Eur. J. Med. Chem.* **2015**, 96, 92-7.
- (a) Angyal, A.; Demjén, A.; Wölfling, J.; Puskás, L. G.; Kanizsai, I., *Tetrahedron Letters* **2018**, 59, 54-57; (b) Bhattacharjee, J.; Das, S.; Kottalanka, R. K.; Panda, T. K., *Dalton Trans* **2016**, 45, 17824-17832; (c) Ding, C.; Wang, S.; Sheng, Y.; Dai, Q.; Zhao, Y.; Liang, G.; Song, Z., *RSC Adv* **2019**, 9, 26768-26772; (d) Fujiwara, S.-i.; Asanuma, Y.; Shin-ike, T.; Kambe, N., *J. Org. Chem.* **2007**, 72, 8087-8090; (e) Halimehjani, A. Z.; Pourshojaei, Y.; Saidi, M. R., *Tetrahedron Lett.* **2009**, 50, 32-34; (f) Kim, T.

H.; Min, J. K.; Lee, G.-J., *Tetrahedron Lett.* **1999**, *40*, 8201-8204; (g) Koohgard, M.; Sarvestani, A. M.; Hosseini-Sarvari, M., *N. J. Chem.* **2020**, *44*, 14505-14512; (h) Li, L.; Wu, J.; Wei, L.; Lu, J.; Jiang, X., *J Org Chem* **2021**, *86*, 446-454; (i) Ramadas, K.; Srinivasan, N., *Synth. Commun.* **1995**, *25*, 3381-3387; (j) Sudha, L. V.; Sathyanarayana, D. N., *J. Mol. Struct.* **1985**, *127*, 313-317; (k) Sugimoto, H.; Makino, I.; Hirai, K., *J. Org. Chem.* **1988**, *53*, 2263-2267; (l) Tavakol, H.; Mahmoudi, A.; Ranjbari, M.-A., *J. Sulfur Chem.* **2018**, *40*, 113-123; (m) Yonemoto, K.; Shibuya, I., *Chem. Soc. Japan* **1988**, *61*, 4043-4049; (n) Zakrzewski, J.; Krawczyk, M., *Phosphorus, Sulfur, and Silicon and the Related Elements* **2009**, *184*, 1880-1903; (o) Souldozi, A.; Ramazani, A.; Dadrass, A. R.; Iepokura, a.; Lis, T., *Helvetica Chimica Acta* **2012**, *95*, 339-348.

## 6. Detail descriptions for products

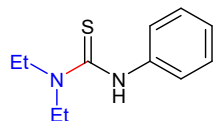

**1,1-diethyl-3-phenylthiourea (1c):**<sup>2</sup> yellow oil was obtained by column chromatography (eluent: EtOAc/petroleum ether = 1/5) with 85% isolated yield (88.4 mg). <sup>1</sup>H NMR (500 MHz, CDCl<sub>3</sub>) δ 7.35 (m, 4H), 7.19 (t, *J* = 7.0 Hz, 1H), 7.09 (s, 1H), 3.73 (q, *J* = 7.1 Hz, 4H), 1.28 (t, *J* = 7.2 Hz, 6H). <sup>13</sup>C NMR (126 MHz, CDCl<sub>3</sub>) δ 180.7, 139.8, 128.6, 125.9, 125.8, 45.7, 12.7. 85

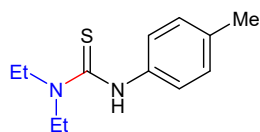

**1,1-diethyl-3-(p-tolyl)thiourea (2c):**<sup>2</sup> yellow oil was obtained by column chromatography (eluent: EtOAc/petroleum ether = 1/5) with 71% isolated yield (78.9 mg). <sup>1</sup>H NMR (400 MHz, CDCl<sub>3</sub>) δ 7.14 (q, *J* = 8.4 Hz, 4H), 6.98 (s, 1H), 3.73 (q, *J* = 7.1 Hz, 4H), 2.32 (s, 3H), 1.27 (t, *J* = 7.2 Hz, 6H). <sup>13</sup>C NMR (101 MHz, CDCl<sub>3</sub>) δ 181.0, 137.2, 135.8, 129.4, 126.3, 45.7, 21.1, 12.7.

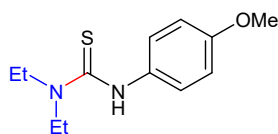

**1,1-diethyl-3-(4-methoxyphenyl)thiourea (3c):**<sup>2</sup> yellow oil was obtained by column chromatography (eluent: EtOAc/petroleum ether = 1/5) with 69% isolated yield (82.1 mg). <sup>1</sup>H NMR (500 MHz, CDCl<sub>3</sub>) δ 7.19 (d, *J* = 8.8 Hz, 2H), 7.02 (s, 1H), 6.86 (d, *J* = 8.8 Hz, 2H), 3.79 (s, 3H), 3.73 (q, *J* = 7.0 Hz, 4H), 1.28 (t, *J* = 7.2 Hz, 6H). <sup>13</sup>C NMR (126 MHz, CDCl<sub>3</sub>) δ 181.0, 157.8, 132.7, 128.2, 113.8, 55.4, 45.6, 12.7.

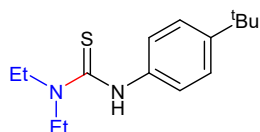

**3-(4-(tert-butyl)phenyl)-1,1-diethylthiourea (4c):** yellow oil was obtained by column chromatography

(eluent: EtOAc/petroleum ether = 1/7) with 60% isolated yield (79.3 mg).  $^1\text{H}$  NMR (400 MHz,  $\text{CDCl}_3$ )  $\delta$  7.36 (m, 1H), 7.35 (m, 1H), 7.24 (d,  $J = 2.0$  Hz, 1H), 7.22 (d,  $J = 2.1$  Hz, 1H), 6.98 (s, 1H), 3.74 (q,  $J = 7.2$  Hz, 4H), 1.30 (s, 9H), 1.29 (t,  $J = 7.2$  Hz, 6H).  $^{13}\text{C}$  NMR (101 MHz,  $\text{CDCl}_3$ )  $\delta$  180.7, 148.7, 137.1, 125.7, 125.4, 45.7, 34.5, 31.4, 12.7. HRMS (ESI)  $m/z$ :  $[\text{M}+\text{H}]^+$  calcd for  $\text{C}_{15}\text{H}_{24}\text{N}_2\text{S}$ : 265.1733; found: 265.1733.

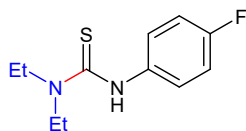

**1,1-diethyl-3-(4-fluorophenyl)thiourea (5c):** yellow oil was obtained by column chromatography (eluent: EtOAc/petroleum ether = 1/5) with 76% isolated yield (86.0 mg).  $^1\text{H}$  NMR (400 MHz,  $\text{CDCl}_3$ )  $\delta$  7.24 (dd,  $J = 8.7, 4.9$  Hz, 2H), 7.06 (m, 3H), 3.73 (q,  $J = 7.1$  Hz, 4H), 1.27 (t,  $J = 7.2$  Hz, 6H).  $^{13}\text{C}$  NMR (101 MHz,  $\text{CDCl}_3$ )  $\delta$  180.9, 160.7 (d,  $J = 245.5$  Hz), 135.8 (d,  $J = 3.1$  Hz), 128.4 (d,  $J = 8.3$  Hz), 115.5 (d,  $J = 22.6$  Hz), 45.7, 12.7.  $^{19}\text{F}$  NMR (376 MHz,  $\text{CDCl}_3$ )  $\delta$  -115.9. HRMS (ESI)  $m/z$ :  $[\text{M}+\text{H}]^+$  calcd for  $\text{C}_{11}\text{H}_{15}\text{FN}_2\text{S}$ : 227.1013; found: 227.1013.

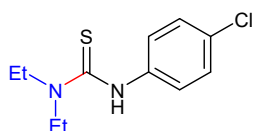

**3-(4-chlorophenyl)-1,1-diethylthiourea (6c):**<sup>2</sup> yellow oil was obtained by column chromatography (eluent: EtOAc/petroleum ether = 1/5) with 79% isolated yield (95.9 mg).  $^1\text{H}$  NMR (400 MHz,  $\text{CDCl}_3$ )  $\delta$  7.28 (m, 4H), 7.00 (s, 1H), 3.72 (q,  $J = 7.1$  Hz, 4H), 1.27 (t,  $J = 7.2$  Hz, 6H).  $^{13}\text{C}$  NMR (101 MHz,  $\text{CDCl}_3$ )  $\delta$  180.5, 138.3, 131.3, 128.7, 127.4, 45.8, 12.7.

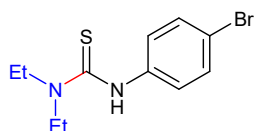

**3-(4-bromophenyl)-1,1-diethylthiourea (7c):** yellow oil was obtained by column chromatography (eluent: EtOAc/petroleum ether = 1/5) with 84% isolated yield (120.6 mg).  $^1\text{H}$  NMR (400 MHz,  $\text{CDCl}_3$ )  $\delta$  7.43 (m, 2H), 7.19 (m, 2H), 7.02 (s, 1H), 3.70 (q,  $J = 7.1$  Hz, 4H), 1.25 (t,  $J = 7.2$  Hz, 6H).  $^{13}\text{C}$  NMR (101 MHz,  $\text{CDCl}_3$ )  $\delta$  180.3, 138.9, 131.6, 127.7, 119.0, 45.8, 12.7. HRMS (ESI)  $m/z$ :  $[\text{M}+\text{H}]^+$  calcd for  $\text{C}_{11}\text{H}_{15}\text{BrN}_2\text{S}$ : 287.0212; found: 287.0212.

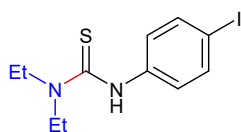

**1,1-diethyl-3-(4-iodophenyl)thiourea (8c):** yellow oil was obtained by column chromatography (eluent: EtOAc/petroleum ether = 1/5) with 66% isolated yield (110.2 mg).  $^1\text{H}$  NMR (400 MHz,  $\text{CDCl}_3$ )  $\delta$  7.62 (m, 2H), 7.09 (m, 2H), 6.99 (s, 1H), 3.72 (q,  $J = 7.1$  Hz, 4H), 1.27 (t,  $J = 7.2$  Hz, 6H).  $^{13}\text{C}$  NMR

(101 MHz, CDCl<sub>3</sub>)  $\delta$  180.3, 139.6, 137.6, 127.8, 121.9, 45.8, 12.7. HRMS (ESI)  $m/z$ : [M+H]<sup>+</sup> calcd for C<sub>11</sub>H<sub>15</sub>N<sub>2</sub>S: 335.0073; found: 335.0073.

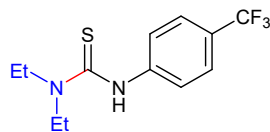

**1,1-diethyl-3-(4-(trifluoromethyl)phenyl)thiourea (9c)**: yellow oil was obtained by column chromatography (eluent: EtOAc/petroleum ether = 1/5) with 63% isolated yield (86.9 mg). <sup>1</sup>H NMR (500 MHz, CDCl<sub>3</sub>)  $\delta$  7.56 (d,  $J$  = 8.6 Hz, 2H), 7.46 (d,  $J$  = 8.5 Hz, 2H), 7.12 (s, 1H), 3.77 (q,  $J$  = 7.1 Hz, 4H), 1.31 (t,  $J$  = 7.2 Hz, 6H). <sup>13</sup>C NMR (126 MHz, CDCl<sub>3</sub>)  $\delta$  180.1, 143.0, 128.6, 126.9 (q,  $J$  = 32.7 Hz), 125.6 (q,  $J$  = 3.7 Hz), 124.9, 124.1 (q,  $J$  = 271.7 Hz), 119.1, 45.8, 12.6. <sup>19</sup>F NMR (471 MHz, CDCl<sub>3</sub>)  $\delta$  -62.1. HRMS (ESI)  $m/z$ : [M+H]<sup>+</sup> calcd for C<sub>12</sub>H<sub>15</sub>F<sub>3</sub>N<sub>2</sub>S: 277.0981; found: 277.0981.

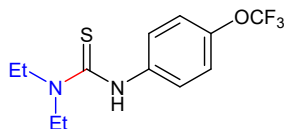

**1,1-diethyl-3-(4-(trifluoromethoxy)phenyl)thiourea (10c)**: white solid was obtained by column chromatography (eluent: EtOAc/petroleum ether = 1/5) with 72% isolated yield (105.2 mg). m. p. = 74-76°C. <sup>1</sup>H NMR (400 MHz, CDCl<sub>3</sub>)  $\delta$  7.59 (m, 2H), 7.45 (m, 2H), 7.11 (s, 1H), 3.75 (q,  $J$  = 7.1 Hz, 4H), 1.29 (t,  $J$  = 7.2 Hz, 6H). <sup>13</sup>C NMR (126 MHz, CDCl<sub>3</sub>)  $\delta$  180.4, 146.5, 138.3, 127.2, 121.0, 120.4 (q,  $J$  = 257.1 Hz), 45.7, 12.6. <sup>19</sup>F NMR (376 MHz, CDCl<sub>3</sub>)  $\delta$  -62.4. HRMS (ESI)  $m/z$ : [M+H]<sup>+</sup> calcd for C<sub>12</sub>H<sub>15</sub>F<sub>3</sub>N<sub>2</sub>OS: 293.0930; found: 2293.0930.

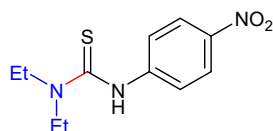

**1,1-diethyl-3-(4-nitrophenyl)thiourea (11c)**: yellow solid was obtained by column chromatography (eluent: EtOAc/petroleum ether = 1/1) with 38% isolated yield (48.1 mg). m. p. = 60-62 °C. <sup>1</sup>H NMR (500 MHz, CDCl<sub>3</sub>)  $\delta$  7.06 (d,  $J$  = 8.5 Hz, 2H), 6.88 (s, 1H), 6.66 (d,  $J$  = 8.5 Hz, 2H), 3.76 (q,  $J$  = 7.1 Hz, 4H), 1.30 (t,  $J$  = 7.1 Hz, 6H). <sup>13</sup>C NMR (126 MHz, CDCl<sub>3</sub>)  $\delta$  181.4, 144.9, 130.8, 128.1, 115.2, 45.6, 12.7. HRMS (ESI)  $m/z$ : [M+H]<sup>+</sup> calcd for C<sub>11</sub>H<sub>15</sub>N<sub>3</sub>O<sub>2</sub>S: 254.0958; found: 254.0958.

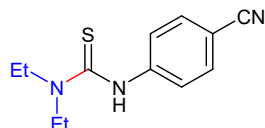

**3-(4-cyanophenyl)-1,1-diethylthiourea (12c)**: yellow oil was obtained by column chromatography (eluent: EtOAc/petroleum ether = 1/3) with 39% isolated yield (45.5 mg). <sup>1</sup>H NMR (500 MHz, CDCl<sub>3</sub>)  $\delta$  7.22 (m, 2H), 6.97 (s, 1H), 6.89 (m, 2H), 3.75 (q,  $J$  = 7.1 Hz, 4H), 1.29 (t,  $J$  = 7.2 Hz, 6H). <sup>13</sup>C NMR (126 MHz, CDCl<sub>3</sub>)  $\delta$  181.1, 157.8, 132.7, 128.1, 126.9, 113.9, 45.6, 12.7. HRMS (ESI)  $m/z$ : [M+H]<sup>+</sup>



calcd for C<sub>12</sub>H<sub>15</sub>N<sub>3</sub>S: 234.1059; found: 234.1059.

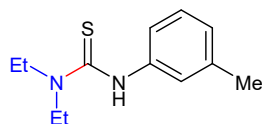

**1,1-diethyl-3-(m-tolyl)thiourea (13c):** yellow oil was obtained by column chromatography (eluent: EtOAc/petroleum ether = 1/5) with 88% isolated yield (97.8 mg). <sup>1</sup>H NMR (400 MHz, CDCl<sub>3</sub>) δ 7.24 (m, 1H), 7.11 (m, 2H), 6.99 (d, *J* = 8.1 Hz, 2H), 3.72 (q, *J* = 7.1 Hz, 4H), 2.32 (s, 3H), 1.26 (t, *J* = 7.2 Hz, 6H). <sup>13</sup>C NMR (101 MHz, CDCl<sub>3</sub>) δ 180.8, 139.7, 138.6, 128.5, 126.7, 126.6, 123.1, 45.7, 21.4, 12.7. HRMS (ESI) *m/z*: [M+H]<sup>+</sup> calcd for C<sub>12</sub>H<sub>18</sub>N<sub>2</sub>S: 223.1263; found: 223.1263.

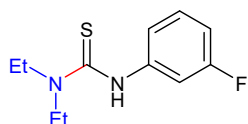

**1,1-diethyl-3-(3-fluorophenyl)thiourea (14c):** yellow oil was obtained by column chromatography (eluent: EtOAc/petroleum ether = 1/5) with 85% isolated yield (96.2 mg). <sup>1</sup>H NMR (500 MHz, CDCl<sub>3</sub>) δ 7.24 (td, *J* = 8.1, 6.6 Hz, 1H), 7.18 (s, 1H), 7.14 (dt, *J* = 10.4, 2.2 Hz, 1H), 7.03 (d, *J* = 8.0 Hz, 1H), 6.85 (td, *J* = 8.3, 2.2 Hz, 1H), 3.71 (q, *J* = 7.1 Hz, 4H), 1.25 (t, *J* = 7.2 Hz, 6H). <sup>13</sup>C NMR (126 MHz, CDCl<sub>3</sub>) δ 180.0, 162.4 (d, *J* = 245.2 Hz), 141.4 (d, *J* = 10.5 Hz), 129.4 (d, *J* = 9.3 Hz), 121.2 (d, *J* = 2.4 Hz), 113.1 (d, *J* = 24.1 Hz), 112.2 (d, *J* = 21.1 Hz), 45.7, 12.6. <sup>19</sup>F NMR (471 MHz, CDCl<sub>3</sub>) δ -112.5. HRMS (ESI) *m/z*: [M+H]<sup>+</sup> calcd for C<sub>11</sub>H<sub>15</sub>FN<sub>2</sub>S: 227.1013; found: 227.1013.

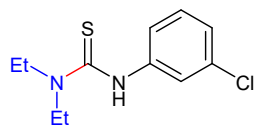

**3-(3-chlorophenyl)-1,1-diethylthiourea (15c):** yellow oil was obtained by column chromatography (eluent: EtOAc/petroleum ether = 1/5) with 80% isolated yield (97.1 mg). <sup>1</sup>H NMR (400 MHz, CDCl<sub>3</sub>) δ 7.32 (t, *J* = 2.0 Hz, 1H), 7.24 (m, 1H), 7.18 (dt, *J* = 8.1, 1.7 Hz, 1H), 7.12 (dt, *J* = 7.5, 1.8 Hz, 1H), 7.07 (s, 1H), 3.70 (q, *J* = 7.1 Hz, 4H), 1.25 (t, *J* = 7.2 Hz, 6H). <sup>13</sup>C NMR (101 MHz, CDCl<sub>3</sub>) δ 180.3, 141.0, 133.9, 129.5, 125.9, 125.7, 124.1, 45.8, 12.7. HRMS (ESI) *m/z*: [M+H]<sup>+</sup> calcd for C<sub>11</sub>H<sub>15</sub>ClN<sub>2</sub>S: 243.0717; found: 243.0717.

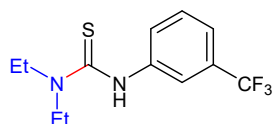

**1,1-diethyl-3-(3-(trifluoromethyl)phenyl)thiourea (16c):** yellow oil was obtained by column chromatography (eluent: EtOAc/petroleum ether = 1/5) with 62% isolated yield (85.5 mg). <sup>1</sup>H NMR (400 MHz, CDCl<sub>3</sub>) δ 7.59 (m, 2H), 7.45 (m, 2H), 7.11 (s, 1H), 3.75 (q, *J* = 7.1 Hz, 4H), 1.29 (t, *J* = 7.2 Hz, 6H). <sup>13</sup>C NMR (126 MHz, CDCl<sub>3</sub>) δ 180.3, 140.3, 130.8 (q, *J* = 32.5 Hz), 129.2, 128.9, 123.8 (q, *J* = 272.9 Hz), 122.3 (q, *J* = 3.8 Hz), 122.1 (q, *J* = 3.8 Hz), 45.7, 12.6. <sup>19</sup>F NMR (376 MHz, CDCl<sub>3</sub>) δ -62.4. HRMS (ESI) *m/z*: [M+H]<sup>+</sup> calcd for C<sub>12</sub>H<sub>15</sub>F<sub>3</sub>N<sub>2</sub>S: 277.0981; found: 277.0981.

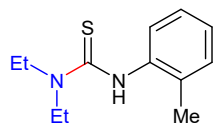

**1,1-diethyl-3-(o-tolyl)thiourea (17c):** yellow oil was obtained by column chromatography (eluent: EtOAc/petroleum ether = 1/5) with 79% isolated yield (87.7mg). <sup>1</sup>H NMR (500 MHz, CDCl<sub>3</sub>) δ 7.20 (dd, *J* = 6.8, 4.6 Hz, 2H), 7.19 (m, 2H), 6.86 (s, 1H), 3.72 (q, *J* = 7.0 Hz, 4H), 2.25 (s, 3H), 1.27 (t, *J* = 7.2 Hz, 6H). <sup>13</sup>C NMR (126 MHz, CDCl<sub>3</sub>) δ 180.8, 138.5, 135.1, 130.6, 128.2, 127.0, 126.3, 45.6, 18.2, 12.7. HRMS (ESI) *m/z*: [M+H]<sup>+</sup> calcd for C<sub>12</sub>H<sub>18</sub>N<sub>2</sub>S: 223.1263; found: 223.1263.

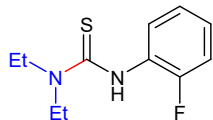

**1,1-diethyl-3-(2-fluorophenyl)thiourea (18c):** yellow solid was obtained by column chromatography (eluent: EtOAc/petroleum ether = 1/5) with 76% isolated yield (85.9mg). m. p. = 42-45°C. <sup>1</sup>H NMR (400 MHz, CDCl<sub>3</sub>) δ 7.88 (m, 1H), 7.16 (m, 3H), 6.95 (s, 1H), 3.77 (q, *J* = 7.2 Hz, 4H), 1.31 (t, *J* = 7.2 Hz, 6H). <sup>13</sup>C NMR (101 MHz, CDCl<sub>3</sub>) δ 180.2, 155.8 (d, *J* = 244.7 Hz), 127.9 (d, *J* = 0.7 Hz), 127.8 (d, *J* = 10.7 Hz), 126.5 (d, *J* = 7.9 Hz), 123.8 (d, *J* = 3.7 Hz), 115.4 (d, *J* = 20.0 Hz), 45.9, 12.6. <sup>19</sup>F NMR (376 MHz, CDCl<sub>3</sub>) δ -126.6. HRMS (ESI) *m/z*: [M+H]<sup>+</sup> calcd for C<sub>11</sub>H<sub>15</sub>FN<sub>2</sub>S: 227.1013; found: 227.1013.

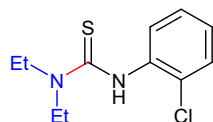

**3-(2-chlorophenyl)-1,1-diethylthiourea (19c):** white solid was obtained by column chromatography (eluent: EtOAc/petroleum ether = 1/7) with 72% isolated yield (87.4mg). m. p. = 97-99°C. <sup>1</sup>H NMR (400 MHz, CDCl<sub>3</sub>) δ 8.05 (dd, *J* = 8.1, 1.5 Hz, 1H), 7.36 (dd, *J* = 8.0, 1.5 Hz, 1H), 7.25 (td, *J* = 7.8, 1.5 Hz, 1H), 7.21 (s, 1H), 7.09 (td, *J* = 7.7, 1.6 Hz, 1H), 3.77 (q, *J* = 7.1 Hz, 4H), 1.32 (t, *J* = 7.2 Hz, 6H). <sup>13</sup>C NMR (101 MHz, CDCl<sub>3</sub>) δ 179.8, 136.7, 129.1, 127.4, 127.4, 126.8, 126.0, 45.8, 12.7. HRMS (ESI) *m/z*: [M+H]<sup>+</sup> calcd for C<sub>11</sub>H<sub>15</sub>ClN<sub>2</sub>S: 243.0717; found: 243.0717.

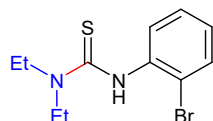

**3-(2-bromophenyl)-1,1-diethylthiourea (20c):** white solid was obtained by column chromatography (eluent: EtOAc/petroleum ether = 1/7) with 96% isolated yield (118.7mg). m. p. = 102-104°C. <sup>1</sup>H NMR (400 MHz, CDCl<sub>3</sub>) δ 8.03 (d, *J* = 8.1 Hz, 1H), 7.53 (d, *J* = 8.1 Hz, 1H), 7.28 (q, *J* = 7.8 Hz, 1H), 7.18 (s, 1H), 7.02 (t, *J* = 7.7 Hz, 1H), 3.77 (q, *J* = 7.1 Hz, 4H), 1.33 (t, *J* = 7.2 Hz, 6H). <sup>13</sup>C NMR (101 MHz, CDCl<sub>3</sub>) δ 179.8, 138.0, 132.3, 127.7, 127.4, 126.5, 118.3, 45.8, 12.8. HRMS (ESI) *m/z*: [M+H]<sup>+</sup> calcd for C<sub>11</sub>H<sub>15</sub>BrN<sub>2</sub>S: 287.0212; found: 287.0212.

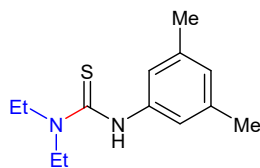

**3-(3,5-dimethylphenyl)-1,1-diethylthiourea (21c):** yellow oil was obtained by column chromatography (eluent: EtOAc/petroleum ether = 1/7) with 80% isolated yield (94.4mg).  $^1\text{H NMR}$  (400 MHz,  $\text{CDCl}_3$ )  $\delta$  6.94 (s, 1H), 6.89 (s, 2H), 6.82 (s, 1H), 3.72 (q,  $J = 7.1$  Hz, 4H), 2.28 (s, 6H), 1.27 (t,  $J = 7.2$  Hz, 6H).  $^{13}\text{C NMR}$  (101 MHz,  $\text{CDCl}_3$ )  $\delta$  180.9, 139.6, 138.4, 127.8, 123.8, 45.7, 21.3, 12.7. HRMS (ESI)  $m/z$ :  $[\text{M}+\text{H}]^+$  calcd for  $\text{C}_{13}\text{H}_{20}\text{N}_2\text{S}$ : 237.1420; found: 237.1420.

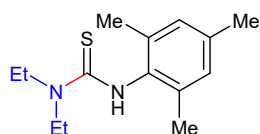

**1,1-diethyl-3-mesitylthiourea (22c):** white solid was obtained by column chromatography (eluent: EtOAc/petroleum ether = 1/7) with 53% isolated yield (66.2mg). m. p. = 105-107°C.  $^1\text{H NMR}$  (400 MHz,  $\text{CDCl}_3$ )  $\delta$  6.90 (s, 2H), 6.52 (s, 1H), 3.78 (q,  $J = 7.1$  Hz, 4H), 2.27 (s, 3H), 2.20 (s, 6H), 1.31 (t,  $J = 7.2$  Hz, 6H).  $^{13}\text{C NMR}$  (101 MHz,  $\text{CDCl}_3$ )  $\delta$  180.6, 137.2, 136.3, 134.6, 129.0, 45.6, 21.1, 18.5, 13.0. HRMS (ESI)  $m/z$ :  $[\text{M}+\text{H}]^+$  calcd for  $\text{C}_{14}\text{H}_{22}\text{N}_2\text{S}$ : 251.1576; found: 251.1576.

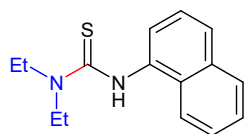

**1,1-diethyl-3-(naphthalen-1-yl)thiourea (23c):**<sup>2</sup> yellow solid was obtained by column chromatography (eluent: EtOAc/petroleum ether = 1/5) with 68% isolated yield (87.7mg). m. p. = 90-92°C.  $^1\text{H NMR}$  (400 MHz,  $\text{CDCl}_3$ )  $\delta$  7.91 (m, 1H), 7.87 (m, 1H), 7.77 (d,  $J = 8.1$  Hz, 1H), 7.53 (m, 2H), 7.45 (d,  $J = 7.8$  Hz, 1H), 7.43 (m, 1H), 7.17 (s, 1H), 3.77 (q,  $J = 7.1$  Hz, 4H), 1.31 (t,  $J = 6.7$  Hz, 6H).  $^{13}\text{C NMR}$  (101 MHz,  $\text{CDCl}_3$ )  $\delta$  182.2, 136.1, 134.3, 130.5, 128.5, 127.4, 126.6, 126.2, 125.5, 125.4, 122.6, 46.0, 12.8.

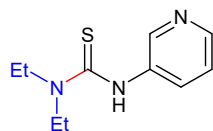

**1,1-diethyl-3-(pyridin-3-yl)thiourea (24c):**<sup>2</sup> yellow oil was obtained by column chromatography (eluent: EtOAc/petroleum ether = 1/1) with 64% isolated yield (67.0mg).  $^1\text{H NMR}$  (500 MHz,  $\text{CDCl}_3$ )  $\delta$  8.40 (d,  $J = 1.8$  Hz, 1H), 8.31 (d,  $J = 4.3$  Hz, 1H), 7.88 (m, 2H), 7.25 (dd,  $J = 8.1, 4.8$  Hz, 1H), 3.77 (q,  $J = 7.0$  Hz, 4H), 1.28 (t,  $J = 7.2$  Hz, 6H).  $^{13}\text{C NMR}$  (126 MHz,  $\text{CDCl}_3$ )  $\delta$  180.4, 146.8, 146.0, 137.1, 134.3, 123.0, 45.8, 12.6.

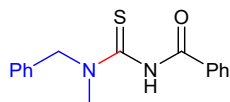

**N-(benzyl(methyl)carbamothioyl)benzamide (25c):**<sup>2</sup> yellow solid was obtained by column chromatography (eluent: EtOAc/petroleum ether = 1/5) with 52% isolated yield (73.8mg). <sup>1</sup>H NMR (500 MHz, CDCl<sub>3</sub>) δ 8.98 (s, 1H), 7.86 (d, *J* = 7.6 Hz, 2H), 7.44 (d, *J* = 6.0 Hz, 3H), 7.38 – 7.34 (m, 3H), 7.29 (t, *J* = 7.3 Hz, 2H), 5.26 (s, 2H), 3.12 (s, 3H). <sup>13</sup>C NMR (126 MHz, CDCl<sub>3</sub>) δ 181.7, 163.8, 134.9, 133.0, 132.4, 129.6, 129.0, 128.8, 128.1, 127.8, 59.4, 40.2.

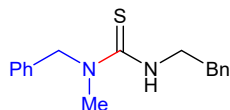

**1-benzyl-1-methyl-3-phenethylthiourea (26c):** yellow oil was obtained by column chromatography (eluent: EtOAc/petroleum ether = 1/7) with 88% isolated yield (125.0mg). <sup>1</sup>H NMR (400 MHz, CDCl<sub>3</sub>) δ 7.33 (m, 5H), 7.23 (m, 5H), 5.43 (s, 1H), 4.97 (s, 2H), 4.00 (m, 2H), 3.02 (s, 1H), 2.92 (t, *J* = 6.8 Hz, 3H). <sup>13</sup>C NMR (101 MHz, CDCl<sub>3</sub>) δ 182.3, 138.8, 136.4, 128.9, 128.8, 128.8, 127.7, 127.1, 126.6, 56.5, 47.1, 35.2. HRMS (ESI) *m/z*: [M+H]<sup>+</sup> calcd for C<sub>17</sub>H<sub>20</sub>N<sub>2</sub>S: 285.1420; found: 285.1420.

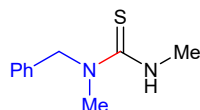

**1-benzyl-1,3-dimethylthiourea (27c):**<sup>2</sup> yellow oil was obtained by column chromatography (eluent: EtOAc/petroleum ether = 1/3) with 81% isolated yield (78.6mg). <sup>1</sup>H NMR (400 MHz, CDCl<sub>3</sub>) δ 7.31 (m, 2H), 7.28 (m, 3H), 5.64 (s, 1H), 5.04 (s, 2H), 3.13 (d, *J* = 4.5 Hz, 3H), 3.10 (s, 3H). <sup>13</sup>C NMR (101 MHz, CDCl<sub>3</sub>) δ 183.4, 136.6, 128.9, 127.7, 127.1, 56.7, 37.3, 33.2.

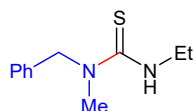

**1-benzyl-3-ethyl-1-methylthiourea (28c):** yellow oil was obtained by column chromatography (eluent: EtOAc/petroleum ether = 1/5) with 95% isolated yield (98.8mg). <sup>1</sup>H NMR (400 MHz, CDCl<sub>3</sub>) δ 7.35 (m, 2H), 7.28 (m, 3H), 5.41 (s, 1H), 5.04 (s, 2H), 3.67 (m, 2H), 3.11 (s, 3H), 1.19 (t, *J* = 7.2 Hz, 3H). <sup>13</sup>C NMR (101 MHz, CDCl<sub>3</sub>) δ 182.3, 136.6, 128.9, 127.7, 127.1, 56.6, 41.3, 37.3, 14.7. HRMS (ESI) *m/z*: [M+H]<sup>+</sup> calcd for C<sub>11</sub>H<sub>16</sub>N<sub>2</sub>S: 209.1107; found: 207.1107.

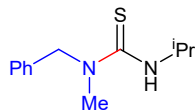

**1-benzyl-3-isopropyl-1-methylthiourea (29c):** white solid was obtained by column chromatography (eluent: EtOAc/petroleum ether = 1/10) with 95% isolated yield (105.4mg). m. p. = 66-68°C. <sup>1</sup>H NMR (500 MHz, CDCl<sub>3</sub>) δ 7.34 (t, *J* = 7.2 Hz, 2H), 7.30 (m, 3H), 5.22 (s, 1H), 5.04 (s, 2H), 4.70 (m, 1H), 3.13 (s, 3H), 1.22 (s, 3H), 1.21 (s, 3H). <sup>13</sup>C NMR (126 MHz, CDCl<sub>3</sub>) δ 181.2, 136.6, 128.8, 127.6, 127.0, 56.4,

47.8, 37.4, 22.8. HRMS (ESI)  $m/z$ :  $[M+H]^+$  calcd for  $C_{12}H_{18}N_2S$ : 223.1263; found: 223.1263.

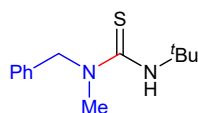

**1-benzyl-3-(tert-butyl)-1-methylthiourea (30c):**<sup>2</sup> yellow oil was obtained by column chromatography (eluent: EtOAc/petroleum ether = 1/10 with 71% isolated yield (83.8mg). <sup>1</sup>H NMR (400 MHz,  $CDCl_3$ )  $\delta$  7.33 (m, 2H), 7.29 (m, 3H), 5.37 (s, 1H), 4.98 (s, 2H), 3.15 (s, 3H), 1.50 (s, 9H). <sup>13</sup>C NMR (101 MHz,  $CDCl_3$ )  $\delta$  181.1, 136.8, 128.9, 127.7, 127.0, 56.1, 54.3, 38.2, 29.2.

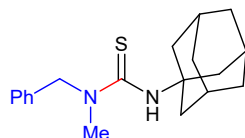

**3-((3R,5R)-adamantan-1-yl)-1-benzyl-1-methylthiourea (31c):** white solid was obtained by column chromatography (eluent: EtOAc/petroleum ether = 1/20 with 75% isolated yield (117.7mg). m. p. = 49-52°C. <sup>1</sup>H NMR (400 MHz,  $CDCl_3$ )  $\delta$  7.35 (m, 2H), 7.28 (m, 3H), 5.23 (s, 1H), 4.96 (s, 2H), 3.13 (s, 3H), 2.22 (d,  $J$  = 2.8 Hz, 6H), 2.07 (s, 3H), 1.65 (m, 6H). <sup>13</sup>C NMR (101 MHz,  $CDCl_3$ )  $\delta$  180.2, 136.8, 128.9, 127.6, 127.0, 56.0, 54.9, 41.8, 38.2, 36.4, 29.7. HRMS (ESI)  $m/z$ :  $[M+H]^+$  calcd for  $C_{19}H_{26}N_2S$ : 315.1889; found: 315.1889.

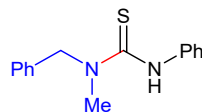

**1-benzyl-1-methyl-3-phenylthiourea (32c):**<sup>2</sup> yellow oil was obtained by column chromatography (eluent: EtOAc/petroleum ether = 1/5 with 60% isolated yield (77.9mg). <sup>1</sup>H NMR (500 MHz,  $CDCl_3$ )  $\delta$  7.41 (m, 2H), 7.31 (dd,  $J$  = 9.0, 3.9 Hz, 5H), 7.25 (d,  $J$  = 6.7 Hz, 2H), 7.22 (m, 2H), 5.07 (s, 2H), 3.22 (s, 3H). <sup>13</sup>C NMR (126 MHz,  $CDCl_3$ )  $\delta$  160.5, 159.7, 157.3, 152.9, 150.6, 144.6, 131.6, 130.4, 129.4, 128.2, 127.4, 115.4, 114.7, 55.6, 29.7.

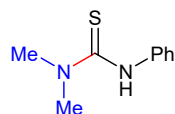

**1,1-dimethyl-3-phenylthiourea (33c):**<sup>2</sup> yellow oil was obtained by column chromatography (eluent: EtOAc/petroleum ether = 1/3 with 80% isolated yield (72.0mg). <sup>1</sup>H NMR (500 MHz,  $CDCl_3$ )  $\delta$  7.33 (t,  $J$  = 7.8 Hz, 2H), 7.25 (t,  $J$  = 8.0 Hz, 2H), 7.18 (t,  $J$  = 7.4 Hz, 2H), 3.30 (s, 6H). <sup>13</sup>C NMR (126 MHz,  $CDCl_3$ )  $\delta$  182.4, 139.8, 128.8, 125.5, 124.9, 41.5.

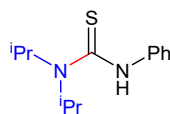

**1,1-diisopropyl-3-phenylthiourea (34c):**<sup>2</sup> yellow solid was obtained by column chromatography (eluent: EtOAc/petroleum ether = 1/7 with 56% isolated yield (66.2mg). <sup>1</sup>H NMR (500 MHz,  $CDCl_3$ )  $\delta$  7.36 (dd,  $J$  = 8.6, 1.0 Hz, 2H), 7.29 (m, 2H), 7.03 (m, 1H), 6.20 (s, 1H), 3.99 (dt,  $J$  = 13.8, 6.9 Hz, 2H),

1.34 (s, 6H), 1.32 (s, 6H). <sup>13</sup>C NMR (126 MHz, CDCl<sub>3</sub>) δ 154.6, 139.3, 128.8, 122.7, 119.7, 45.4, 21.5.

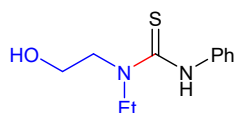

**1-ethyl-1-(2-hydroxyethyl)-3-phenylthiourea (35c):**<sup>2</sup> yellow oil was obtained by column chromatography (eluent: EtOAc/petroleum ether = 1/1 with 55% isolated yield (61.7mg). <sup>1</sup>H NMR (500 MHz, DMSO-d<sub>6</sub>) δ 9.48 (s, 1H), 7.29 (m, 4H), 7.08 (t, *J* = 7.1 Hz, 1H), 5.59 (s, 1H), 3.82 (q, *J* = 7.0 Hz, 2H), 3.72 (s, 4H), 1.19 (t, *J* = 7.0 Hz, 3H). <sup>13</sup>C NMR (126 MHz, DMSO-d<sub>6</sub>) δ 181.5, 141.3, 128.3, 125.2, 124.4, 60.4, 52.7, 46.7, 12.5.

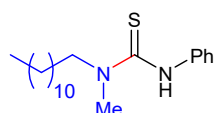

**1-dodecyl-1-methyl-3-phenylthiourea (36c):** yellow oil was obtained by column chromatography (eluent: EtOAc/petroleum ether = 1/5 with 94% isolated yield (77.9mg). <sup>1</sup>H NMR (400 MHz, CDCl<sub>3</sub>) δ 7.32 (m, 2H), 7.25 (m, 2H), 7.17 (m, 2H), 3.76 (t, *J* = 7.68 Hz, 2H), 3.16 (s, 3H), 1.65 (m, 2H), 1.26 (m, 18H), 0.88 (t, *J* = 7.12 Hz, 3H). <sup>13</sup>C NMR (101 MHz, CDCl<sub>3</sub>) δ 181.7, 140.0, 128.7, 125.6, 125.4, 54.2, 39.1, 32.0, 29.7, 29.7, 29.6, 29.6, 29.5, 29.4, 27.3, 26.9, 22.7, 14.2. HRMS (ESI) *m/z*: [M+H]<sup>+</sup> calcd for C<sub>20</sub>H<sub>34</sub>N<sub>2</sub>S: 335.2515; found: 335.2507.

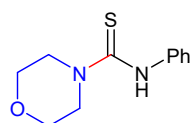

**N-phenylmorpholine-4-carbothioamide (37c):**<sup>2</sup> white solid was obtained by column chromatography (eluent: EtOAc/petroleum ether = 1/3 with 60% isolated yield (66.6mg). <sup>1</sup>H NMR (500 MHz, CDCl<sub>3</sub>) δ 7.54 (d, *J* = 5.4 Hz, 1H), 7.32 (t, *J* = 7.8 Hz, 2H), 7.15 (dd, *J* = 17.2, 7.8 Hz, 3H), 3.78 (dd, *J* = 6.4, 3.1 Hz, 4H), 3.69 (dd, *J* = 5.6, 3.9 Hz, 4H). <sup>13</sup>C NMR (126 MHz, CDCl<sub>3</sub>) δ 183.5, 139.8, 129.1, 125.4, 123.3, 66.1, 49.6.

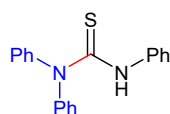

**1,1,3-triphenylthiourea (38c):** yellow oil was obtained by column chromatography (eluent: EtOAc/petroleum ether = 1/4 with 24% isolated yield (36.5mg). <sup>1</sup>H NMR (500 MHz, CDCl<sub>3</sub>) δ 8.88 (s, 1H), 8.69 (d, *J* = 10.4 Hz, 1H), 8.32 (s, 1H), 8.08 (d, *J* = 29.3 Hz, 1H), 7.54 (d, *J* = 7.9 Hz, 2H), 7.37 (m, 5H), 7.19 (m, 1H), 7.15 (m, 4H). <sup>13</sup>C NMR (126 MHz, CDCl<sub>3</sub>) δ 163.1, 163.0, 159.6, 159.6, 137.0, 137.0, 136.8, 136.8, 129.7, 129.0, 125.3, 124.8, 120.1, 120.1, 118.8. HRMS (ESI) *m/z*: [M+H]<sup>+</sup> calcd for C<sub>19</sub>H<sub>16</sub>N<sub>2</sub>S: 305.1107; found: 305.1107.

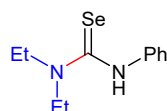

**1,1-diethyl-3-phenylselenourea (1e):** yellow oil was obtained by column chromatography (eluent: EtOAc/petroleum ether = 1/2 with 56% isolated yield (71.7mg). <sup>1</sup>H NMR (500 MHz, CDCl<sub>3</sub>) δ 7.35 (t, *J* = 7.7 Hz, 2H), 7.30 (d, *J* = 7.3 Hz, 2H), 7.28 (m, 2H), 3.82 (d, *J* = 5.2 Hz, 4H), 1.30 (t, *J* = 7.2 Hz, 6H). <sup>13</sup>C NMR (126 MHz, CDCl<sub>3</sub>) δ 180.5, 140.5, 128.7, 126.7, 126.4, 41.6, 12.5. HRMS (ESI) *m/z*: [M+H]<sup>+</sup> calcd for C<sub>11</sub>H<sub>16</sub>N<sub>2</sub>Se: 257.0551; found: 257.0551.

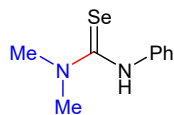

**1,1-dimethyl-3-phenylselenourea (2e):**<sup>2</sup> yellow oil was obtained by column chromatography (eluent: EtOAc/petroleum ether = 1/2 with 37% isolated yield (42.0mg). <sup>1</sup>H NMR (500 MHz, CDCl<sub>3</sub>) δ 7.46 (s, 1H), 7.35 (t, *J* = 7.8 Hz, 2H), 7.21 (t, *J* = 8.0 Hz, 3H), 3.35 (s, 6H). <sup>13</sup>C NMR (126 MHz, CDCl<sub>3</sub>) δ 182.4, 140.3, 128.9, 126.0, 125.2, 36.4.

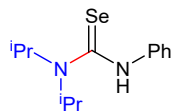

**1,1-diisopropyl-3-phenylselenourea (3e):** white solid was obtained by column chromatography (eluent: EtOAc/petroleum ether = 1/5 with 42% isolated yield (59.4mg). m. p. = 112-114°C. <sup>1</sup>H NMR (500 MHz, CDCl<sub>3</sub>) δ 7.37 (d, *J* = 8.3 Hz, 2H), 7.27 (dd, *J* = 9.9, 5.6 Hz, 2H), 6.99 (dd, *J* = 10.8, 3.9 Hz, 1H), 6.22 (s, 1H), 3.98 (dt, *J* = 13.7, 6.9 Hz, 2H), 1.33 (s, 6H), 1.31 (s, 6H). <sup>13</sup>C NMR (126 MHz, CDCl<sub>3</sub>) δ 154.6, 139.3, 128.8, 122.6, 119.6, 45.4, 21.5. HRMS (ESI) *m/z*: [M+H]<sup>+</sup> calcd for C<sub>13</sub>H<sub>20</sub>N<sub>2</sub>Se: 285.0864; found: 285.0864.

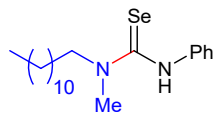

**1-dodecyl-1-methyl-3-phenylselenourea (4e):** yellow oil was obtained by column chromatography (eluent: EtOAc/petroleum ether = 1/3 with 88% isolated yield (167.6mg). <sup>1</sup>H NMR (500 MHz, CDCl<sub>3</sub>) δ 7.47 (s, 1H), 7.36 (m, 2H), 7.21 (t, *J* = 8.5 Hz, 3H), 3.84 (s, 2H), 3.20 (s, 3H), 1.73 (m, 2H), 1.28 (d, *J* = 18.3 Hz, 18H), 0.88 (t, *J* = 6.9 Hz, 3H). <sup>13</sup>C NMR (126 MHz, CDCl<sub>3</sub>) δ 181.5, 140.5, 128.7, 126.1, 125.9, 49.1, 34.6, 31.9, 29.6, 29.6, 29.5, 29.5, 29.3, 29.3, 27.1, 26.8, 22.6, 14.1. HRMS (ESI) *m/z*: [M+H]<sup>+</sup> calcd for C<sub>20</sub>H<sub>34</sub>N<sub>2</sub>Se: 383.1960; found: 383.1960.

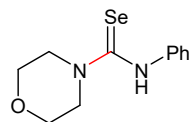

**N-phenylmorpholine-4-carboselenoamide (5e):**<sup>2</sup> yellow solid was obtained by column chromatography (eluent: EtOAc/petroleum ether = 1/2 with 26% isolated yield (34.9mg). <sup>1</sup>H NMR (500 MHz, CDCl<sub>3</sub>) δ 7.82 (s, 1H), 7.35 (dd, *J* = 10.8, 5.0 Hz, 2H), 7.19 (t, *J* = 7.4 Hz, 1H), 7.08 (d, *J* = 7.5 Hz, 2H), 3.90 (m, 4H), 3.74 (m, 4H). <sup>13</sup>C NMR (126 MHz, CDCl<sub>3</sub>) δ 183.8, 140.0, 129.4, 125.7, 122.9,

66.0, 52.1.

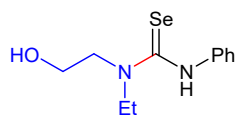

**1-ethyl-1-(2-hydroxyethyl)-3-phenylselenourea (6e):** red oil was obtained by column chromatography (eluent: EtOAc/petroleum ether = 1/3 with 40% isolated yield (54.2mg).  $^1\text{H}$  NMR (500 MHz,  $\text{CDCl}_3$ )  $\delta$  9.45 (s, 1H), 7.39 (m, 5H), 7.17 (t,  $J = 7.3$  Hz, 1H), 3.96 (d,  $J = 6.8$  Hz, 2H), 3.86 (m, 2H), 3.74 (d,  $J = 5.0$  Hz, 2H), 1.32 (t,  $J = 7.1$  Hz, 3H).  $^{13}\text{C}$  NMR (126 MHz,  $\text{CDCl}_3$ )  $\delta$  182.4, 141.0, 128.5, 125.4, 125.2, 61.5, 48.6, 42.6, 12.2. HRMS (ESI)  $m/z$ :  $[\text{M}+\text{H}]^+$  calcd for  $\text{C}_{11}\text{H}_{16}\text{N}_2\text{OSe}$ : 273.0501; found: 273.0501.

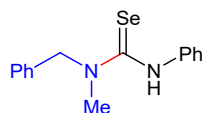

**1-benzyl-1-methyl-3-phenylselenourea (7e):** yellow oil was obtained by column chromatography (eluent: EtOAc/petroleum ether = 1/4 with 33% isolated yield (50.04mg).  $^1\text{H}$  NMR (500 MHz,  $\text{CDCl}_3$ )  $\delta$  7.53 (s, 1H), 7.39 (m, 7H), 7.26 (m, 3H), 5.18 (s, 2H), 3.20 (s, 3H).  $^{13}\text{C}$  NMR (126 MHz,  $\text{CDCl}_3$ )  $\delta$  183.0, 140.4, 135.4, 129.0, 128.9, 128.8, 128.0, 127.4, 127.3, 126.4, 126.2, 123.2, 120.1, 52.3, 34.8. HRMS (ESI)  $m/z$ :  $[\text{M}+\text{H}]^+$  calcd for  $\text{C}_{15}\text{H}_{16}\text{N}_2\text{Se}$ : 305.0551; found: 305.0551.

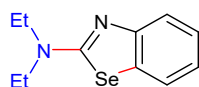

**N,N-diethylbenzo[d][1,3]selenazol-2-amine (1f):**<sup>2</sup> yellow oil was obtained by column chromatography (eluent: EtOAc/petroleum ether = 1/20 with 60% isolated yield (76.2mg).  $^1\text{H}$  NMR (500 MHz,  $\text{CDCl}_3$ )  $\delta$  7.54 (dd,  $J = 7.8, 1.0$  Hz, 1H), 7.46 (dd,  $J = 8.0, 0.9$  Hz, 1H), 7.21 (m, 1H), 6.88 (td,  $J = 7.7, 1.2$  Hz, 1H), 3.46 (q,  $J = 7.1$  Hz, 4H), 1.21 (t,  $J = 7.1$  Hz, 6H).  $^{13}\text{C}$  NMR (126 MHz,  $\text{CDCl}_3$ )  $\delta$  167.5, 155.1, 133.3, 126.1, 123.8, 120.8, 119.8, 46.5, 13.0.

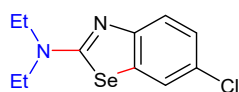

**6-chloro-N,N-diethylbenzo[d][1,3]selenazol-2-amine (2f):** yellow oil was obtained by column chromatography (eluent: EtOAc/petroleum ether = 1/10 with 74% isolated yield (106.43mg).  $^1\text{H}$  NMR (500 MHz,  $\text{CDCl}_3$ )  $\delta$  7.56 (d,  $J = 2.2$  Hz, 1H), 7.41 (d,  $J = 8.6$  Hz, 1H), 7.21 (dd,  $J = 8.6, 2.2$  Hz, 1H), 3.52 (q,  $J = 7.1$  Hz, 4H), 1.28 (t,  $J = 7.2$  Hz, 6H).  $^{13}\text{C}$  NMR (126 MHz,  $\text{CDCl}_3$ )  $\delta$  167.5, 153.7, 134.3, 126.4, 125.7, 123.4, 120.3, 46.6, 12.9. HRMS (ESI)  $m/z$ :  $[\text{M}+\text{H}]^+$  calcd for  $\text{C}_{11}\text{H}_{13}\text{ClN}_2\text{Se}$ : 289.0005; found: 289.0005.

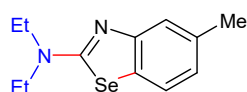

**N,N-diethyl-5-methylbenzo[d][1,3]selenazol-2-amine (3f):** yellow oil was obtained by column



chromatography (eluent: EtOAc/petroleum ether = 1/10 with 64% isolated yield (86.4mg). <sup>1</sup>H NMR (500 MHz, CDCl<sub>3</sub>) δ 7.47 (d, *J* = 7.9 Hz, 1H), 7.38 (s, 1H), 6.79 (d, *J* = 7.9 Hz, 1H), 3.53 (q, *J* = 7.1 Hz, 4H), 2.37 (s, 3H), 1.28 (t, *J* = 7.1 Hz, 6H). <sup>13</sup>C NMR (126 MHz, CDCl<sub>3</sub>) δ 167.7, 155.3, 135.9, 129.7, 123.3, 122.0, 120.4, 46.4, 21.4, 13.0. HRMS (ESI) *m/z*: [M+H]<sup>+</sup> calcd for C<sub>12</sub>H<sub>16</sub>N<sub>2</sub>Se: 269.0551; found: 269.0551.

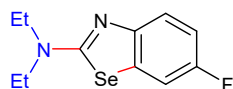

**N,N-diethyl-6-fluorobenzo[d][1,3]selenazol-2-amine (4f):** yellow oil was obtained by column chromatography (eluent: EtOAc/petroleum ether = 1/10 with 65% isolated yield (88.1mg). <sup>1</sup>H NMR (500 MHz, CDCl<sub>3</sub>) δ 7.44 (dd, *J* = 8.8, 4.8 Hz, 1H), 7.32 (dd, *J* = 8.0, 2.7 Hz, 1H), 6.98 (td, *J* = 8.9, 2.7 Hz, 1H), 3.52 (q, *J* = 7.1 Hz, 4H), 1.28 (t, *J* = 7.1 Hz, 6H). <sup>13</sup>C NMR (126 MHz, CDCl<sub>3</sub>) δ 166.8, 157.5 (d, *J* = 240.4 Hz), 151.5 (d, *J* = 1.6 Hz), 133.7 (d, *J* = 9.6 Hz), 119.9 (d, *J* = 8.3 Hz), 113.4 (d, *J* = 23.4 Hz), 110.5 (d, *J* = 26.1 Hz), 46.4, 13.0. <sup>19</sup>F NMR (471 MHz, CDCl<sub>3</sub>) δ -122.6. HRMS (ESI) *m/z*: [M+H]<sup>+</sup> calcd for C<sub>11</sub>H<sub>13</sub>FN<sub>2</sub>Se: 273.0301; found: 273.0301.

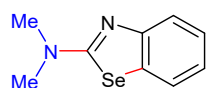

**N,N-dimethylbenzo[d][1,3]selenazol-2-amine (5f):** white solid was obtained by column chromatography (eluent: EtOAc/petroleum ether = 1/10 with 34% isolated yield (38.2mg). m. p. = 110-112°C. <sup>1</sup>H NMR (500 MHz, CDCl<sub>3</sub>) δ 7.63 (d, *J* = 7.8 Hz, 1H), 7.57 (d, *J* = 8.1 Hz, 1H), 7.28 (dd, *J* = 11.9, 4.6 Hz, 1H), 6.98 (t, *J* = 7.6 Hz, 1H), 3.19 (s, 6H). <sup>13</sup>C NMR (126 MHz, CDCl<sub>3</sub>) δ 169.1, 155.0, 133.8, 126.2, 123.9, 121.0, 120.1, 41.0. HRMS (ESI) *m/z*: [M+H]<sup>+</sup> calcd for C<sub>9</sub>H<sub>10</sub>N<sub>2</sub>Se: 227.0082; found: 227.0082.

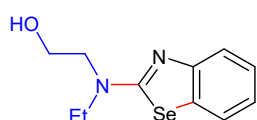

**2-(benzo[d][1,3]selenazol-2-yl(ethyl)amino)ethan-1-ol (6f):** yellow oil was obtained by column chromatography (eluent: EtOAc/petroleum ether = 1/3 with 39% isolated yield (52.4mg). <sup>1</sup>H NMR (500 MHz, CDCl<sub>3</sub>) δ 7.61 (dd, *J* = 7.8, 0.5 Hz, 1H), 7.52 (m, 1H), 7.30 (m, 1H), 6.99 (td, *J* = 7.8, 1.0 Hz, 1H), 4.84 (s, 1H), 3.94 (m, 2H), 3.79 (m, 2H), 3.46 (q, *J* = 7.2 Hz, 2H), 1.31 (t, *J* = 7.2 Hz, 3H). <sup>13</sup>C NMR (126 MHz, CDCl<sub>3</sub>) δ 169.7, 153.6, 132.8, 126.3, 123.9, 121.5, 119.9, 62.9, 54.1, 50.8, 12.9. HRMS (ESI) *m/z*: [M+H]<sup>+</sup> calcd for C<sub>11</sub>H<sub>14</sub>N<sub>2</sub>OSe: 271.0344; found: 271.0344.

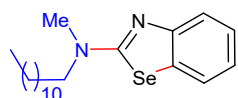

**N-dodecyl-N-methylbenzo[d][1,3]selenazol-2-amine (7f):** yellow oil was obtained by column chromatography (eluent: EtOAc/petroleum ether = 1/10 with 65% isolated yield (123.2mg). <sup>1</sup>H NMR

(500 MHz, CDCl<sub>3</sub>) δ 7.62 (td, *J* = 7.9, 1.2 Hz, 1H), 7.5 (m, 1H), 7.28 (m, 1H), 6.96 (td, *J* = 7.7, 1.1 Hz, 1H), 3.48 (m, 2H), 3.17 (s, 3H), 1.72 (m, 2H), 1.32 (m, 18H), 0.88 (t, *J* = 6.9 Hz, 3H). <sup>13</sup>C NMR (126 MHz, CDCl<sub>3</sub>) δ 168.6, 155.0, 139.0, 126.1, 123.8, 120.9, 119.9, 54.9, 38.6, 31.9, 29.6, 29.6, 29.5, 29.5, 29.3, 29.3, 27.3, 26.8, 22.7, 14.1. HRMS (ESI) *m/z*: [M+H]<sup>+</sup> calcd for C<sub>20</sub>H<sub>32</sub>N<sub>2</sub>Se: 381.1803; found: 381.1803.

## 7. Copies of product NMR Spectra

1c

<sup>1</sup>H NMR

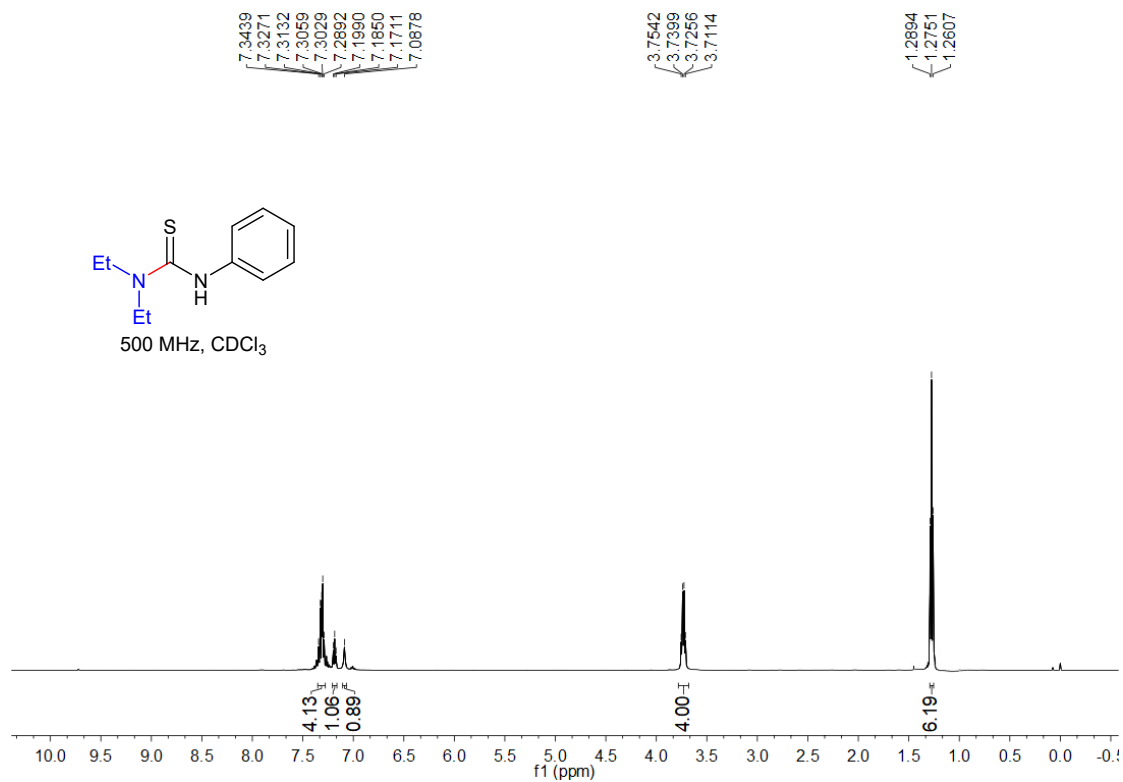

<sup>13</sup>C NMR

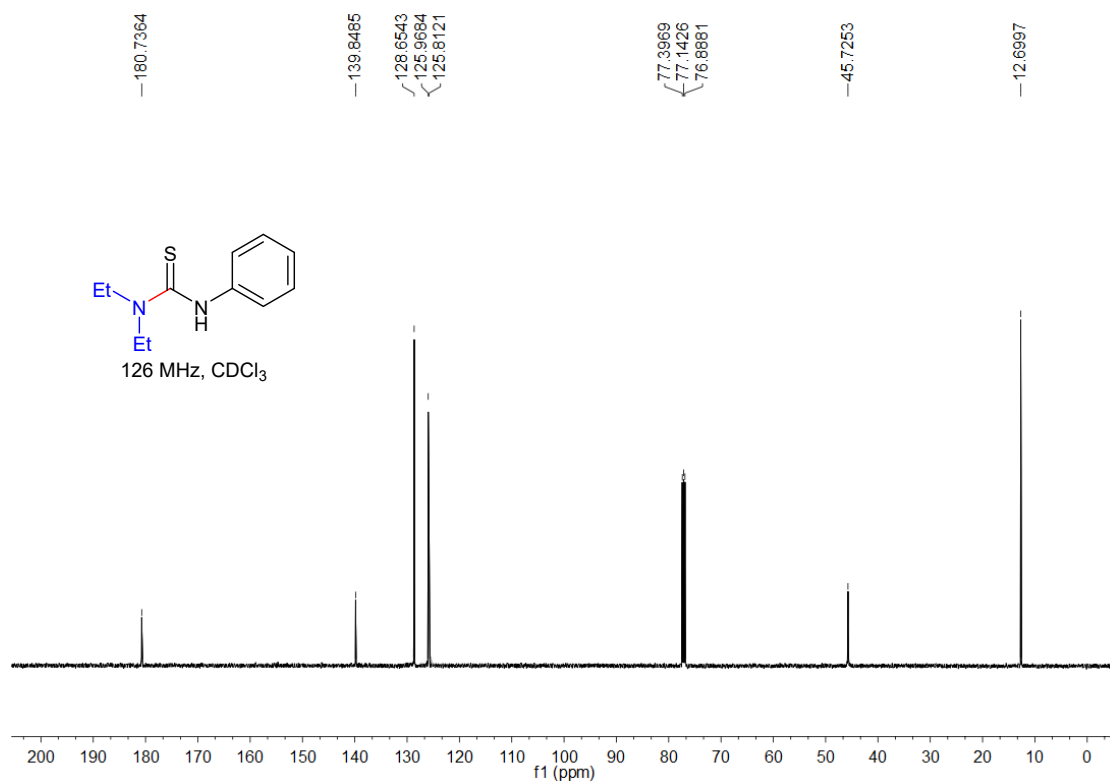

2c

<sup>1</sup>H NMR

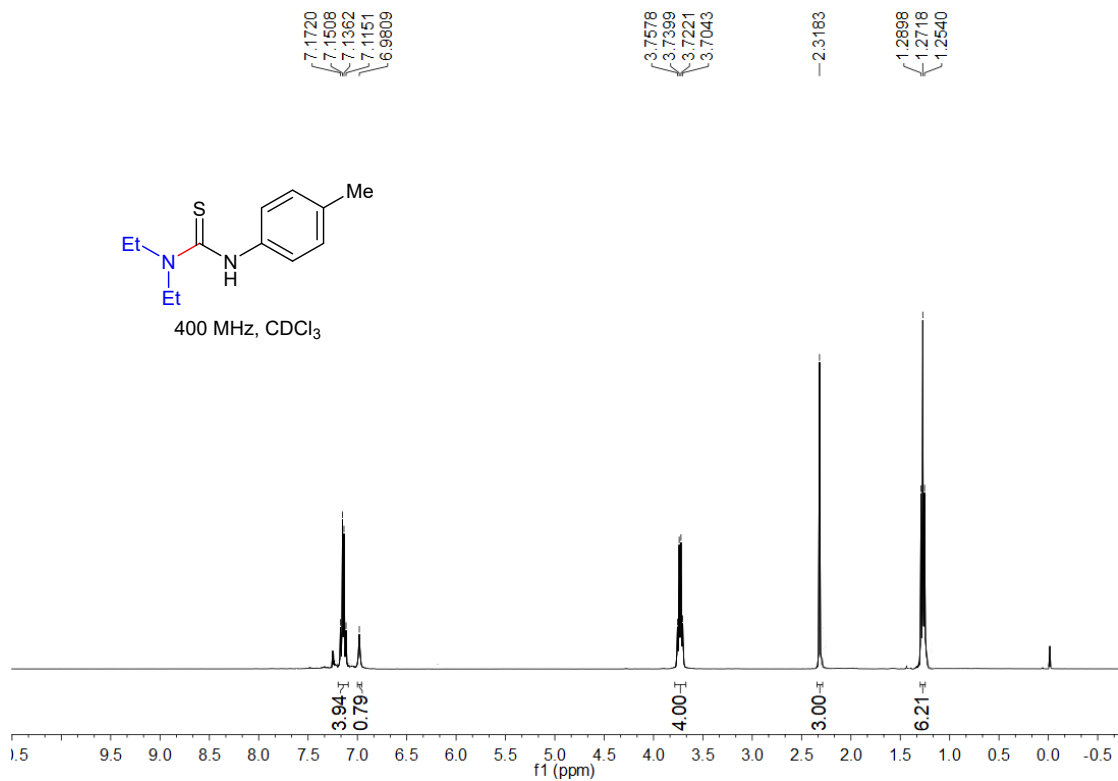

<sup>13</sup>C NMR

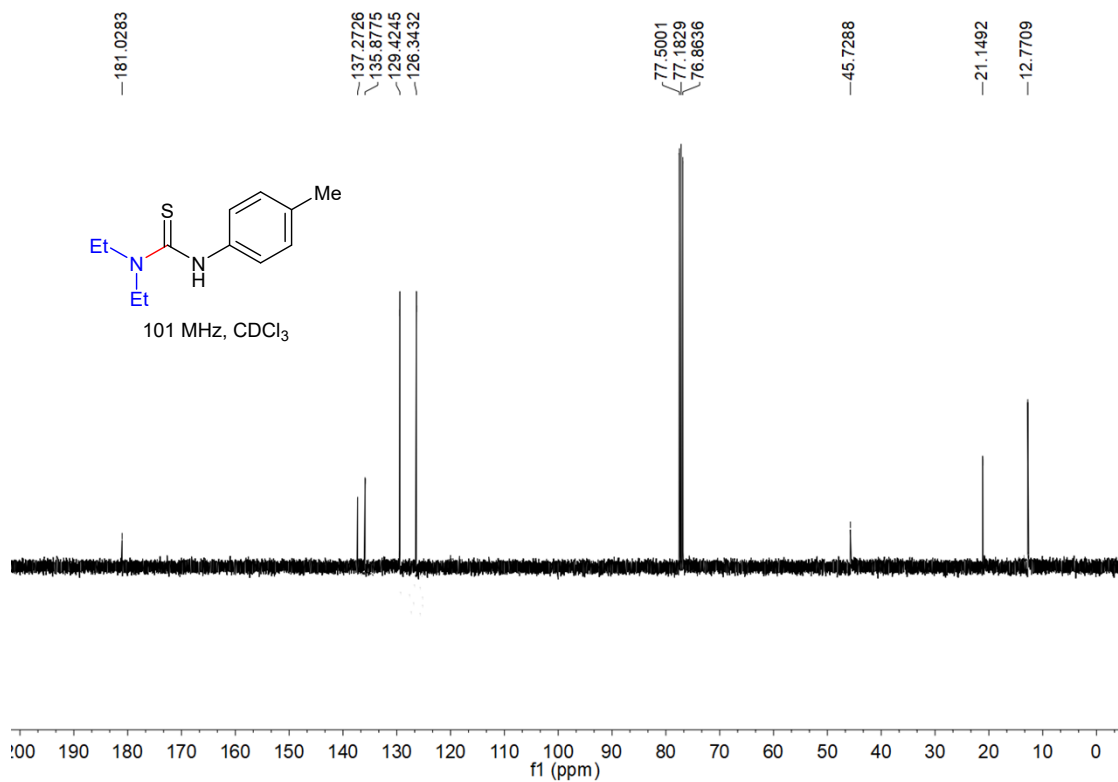

3c

<sup>1</sup>H NMR

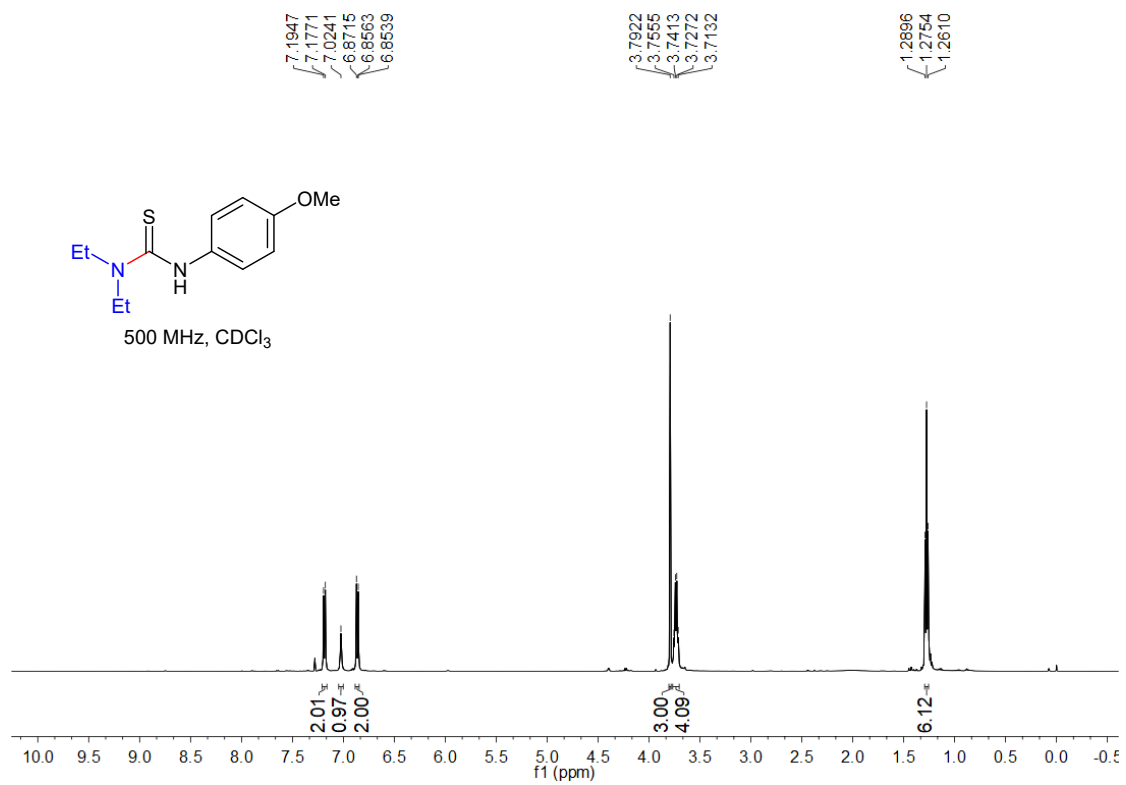

<sup>13</sup>C NMR

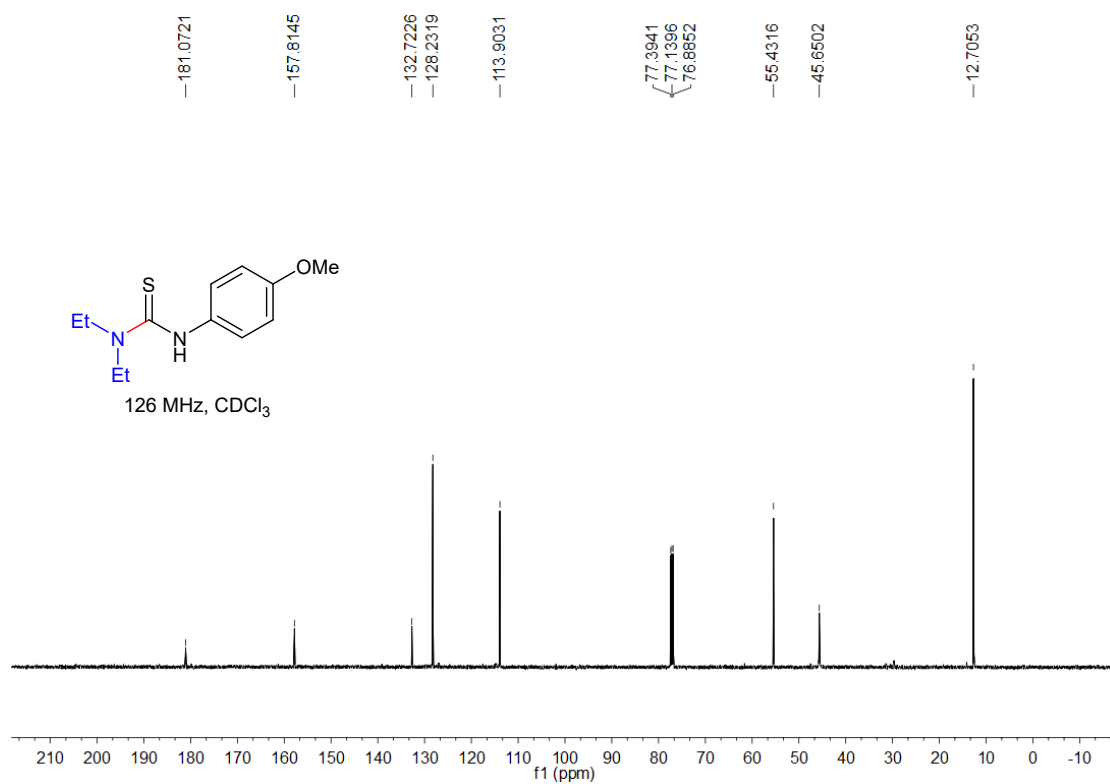

4c

<sup>1</sup>H NMR

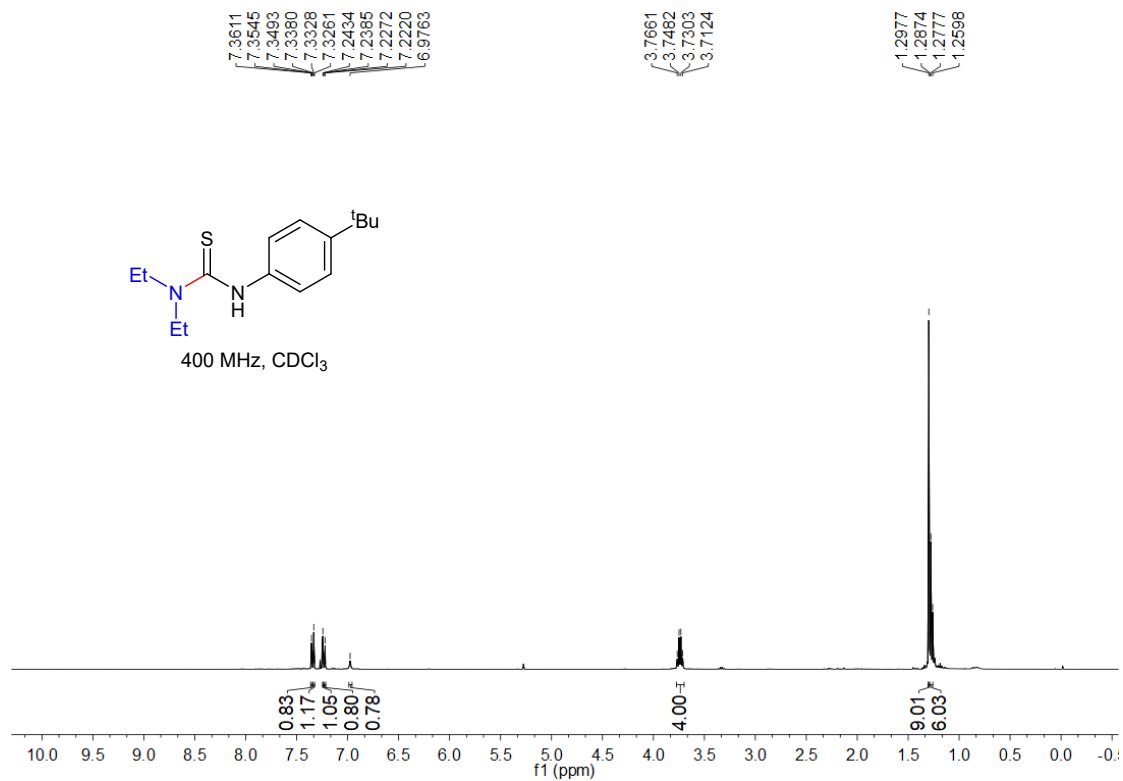

<sup>13</sup>C NMR

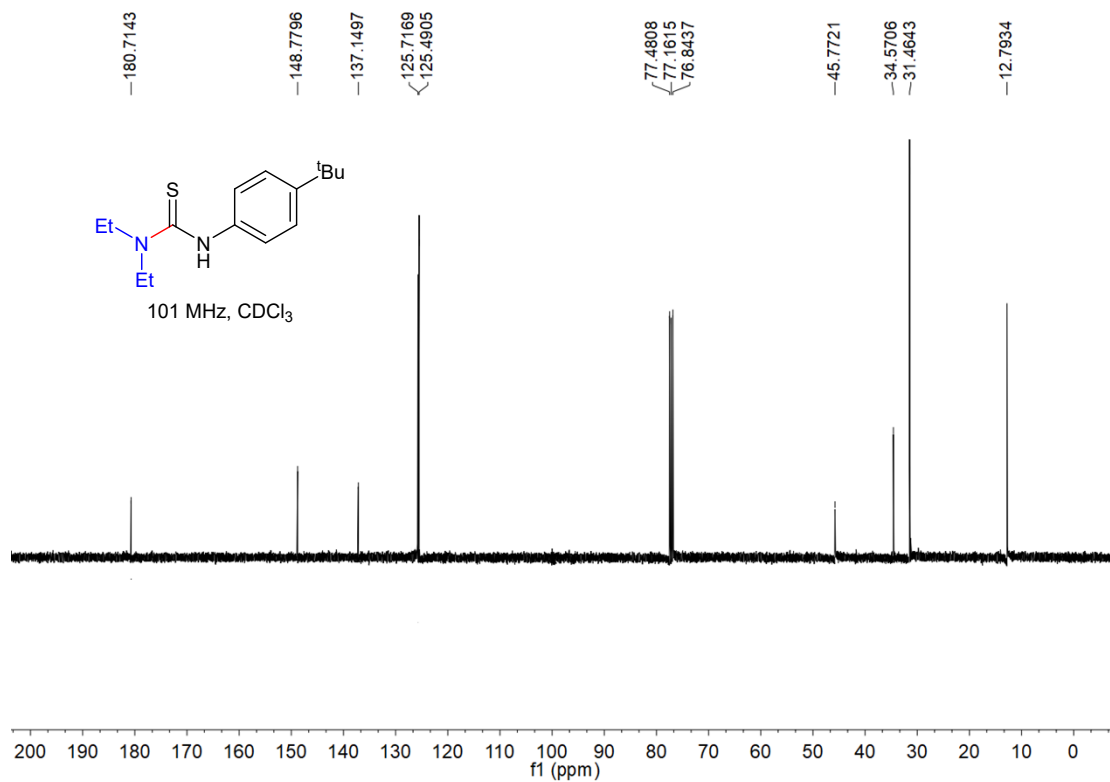

### 5c

#### <sup>1</sup>H NMR

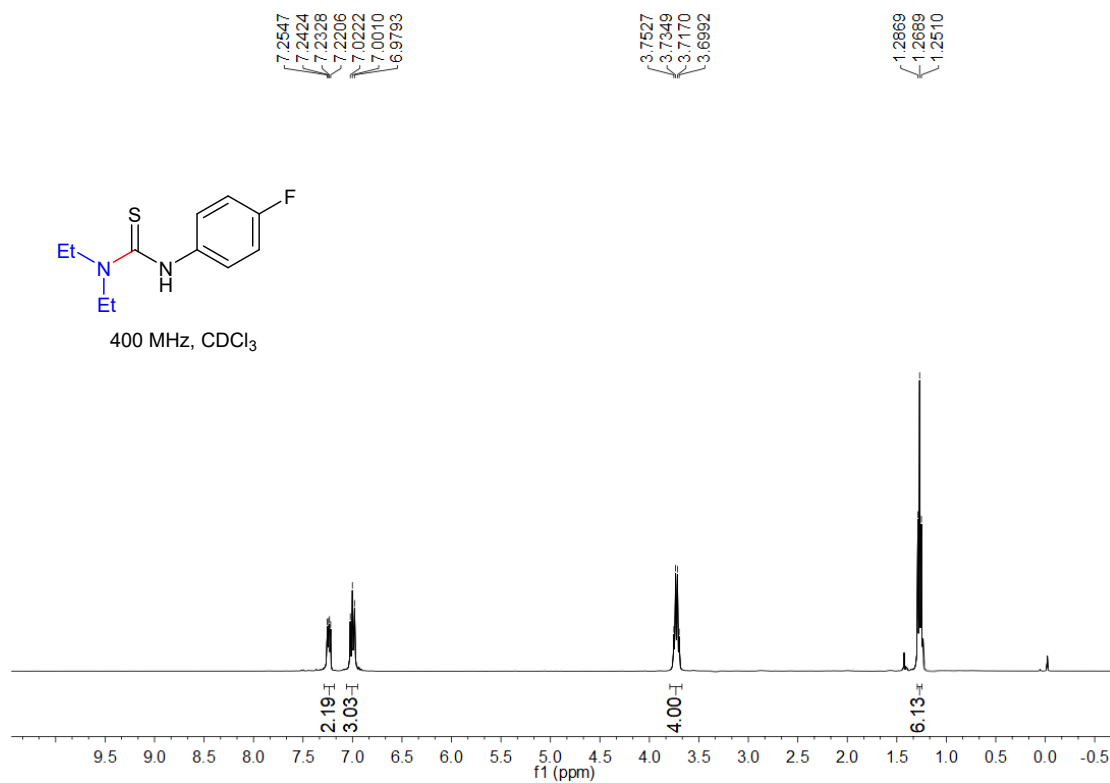

#### <sup>13</sup>C NMR

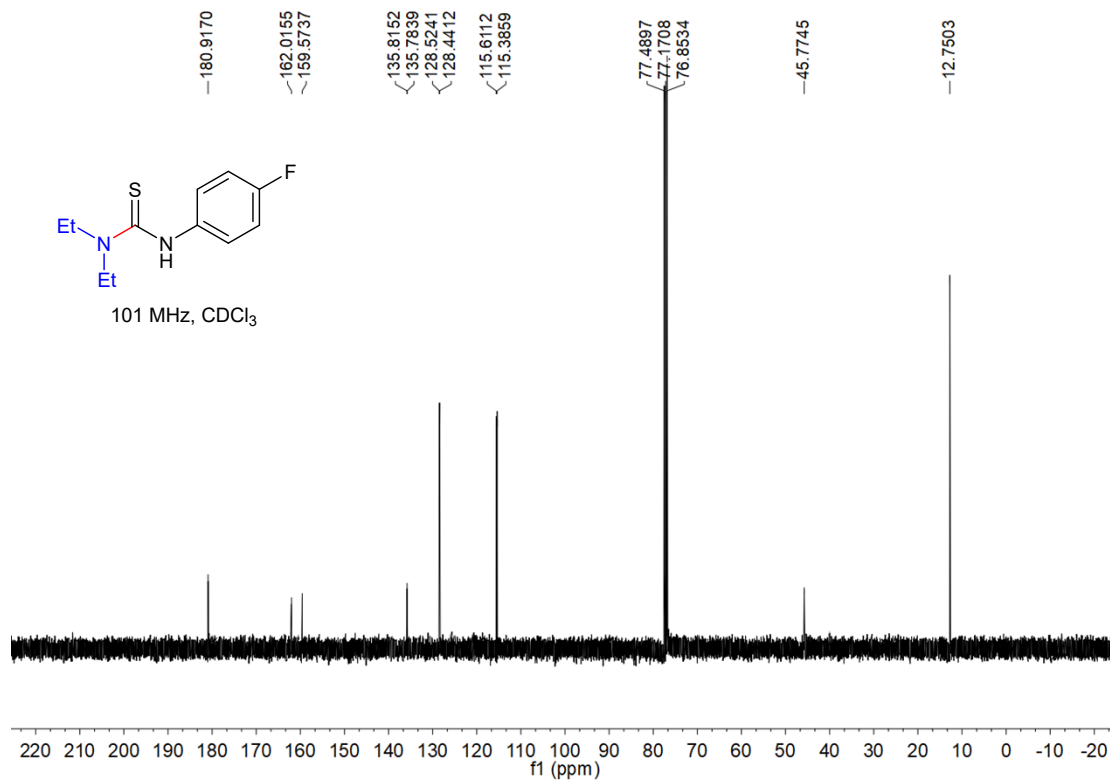

**<sup>19</sup>F NMR**

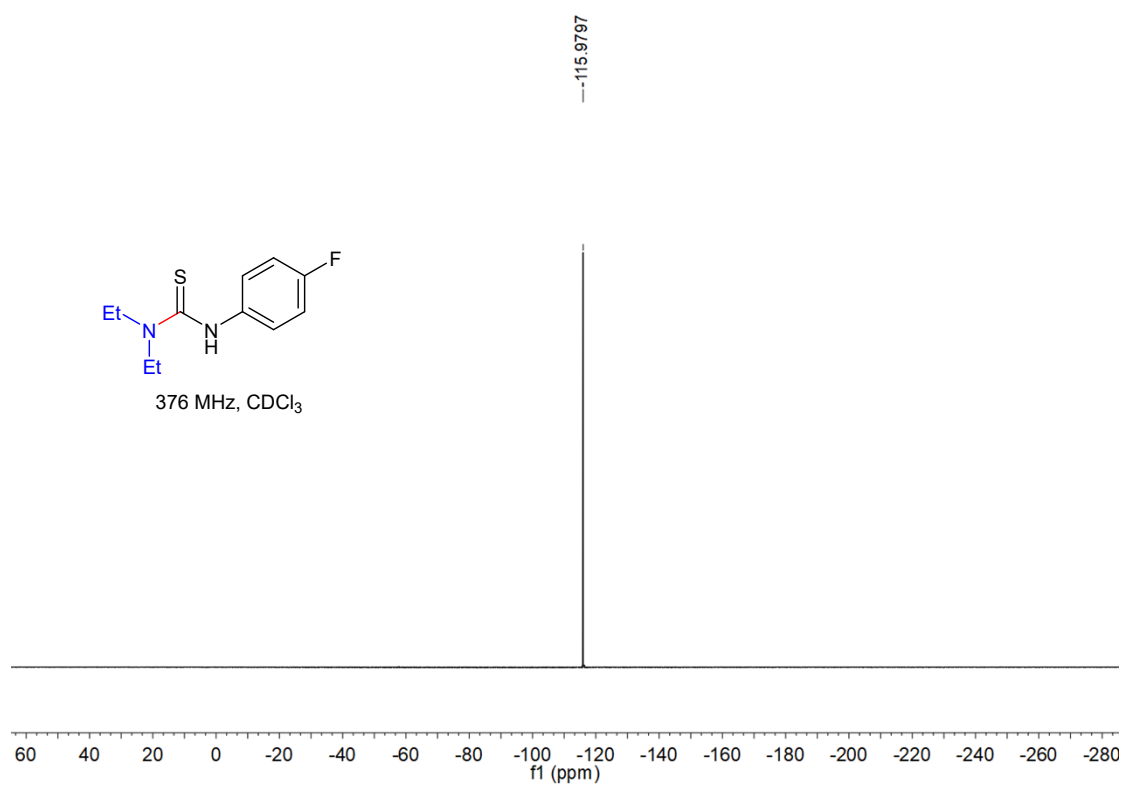



6c

<sup>1</sup>H NMR

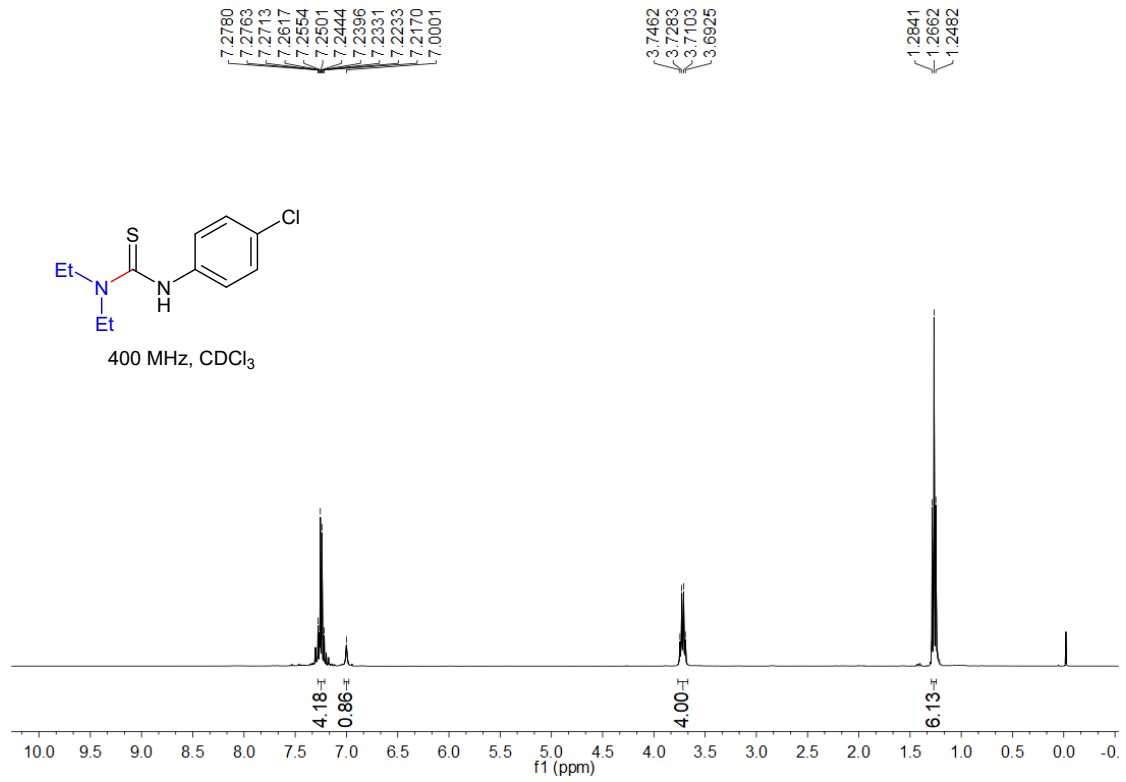

<sup>13</sup>C NMR

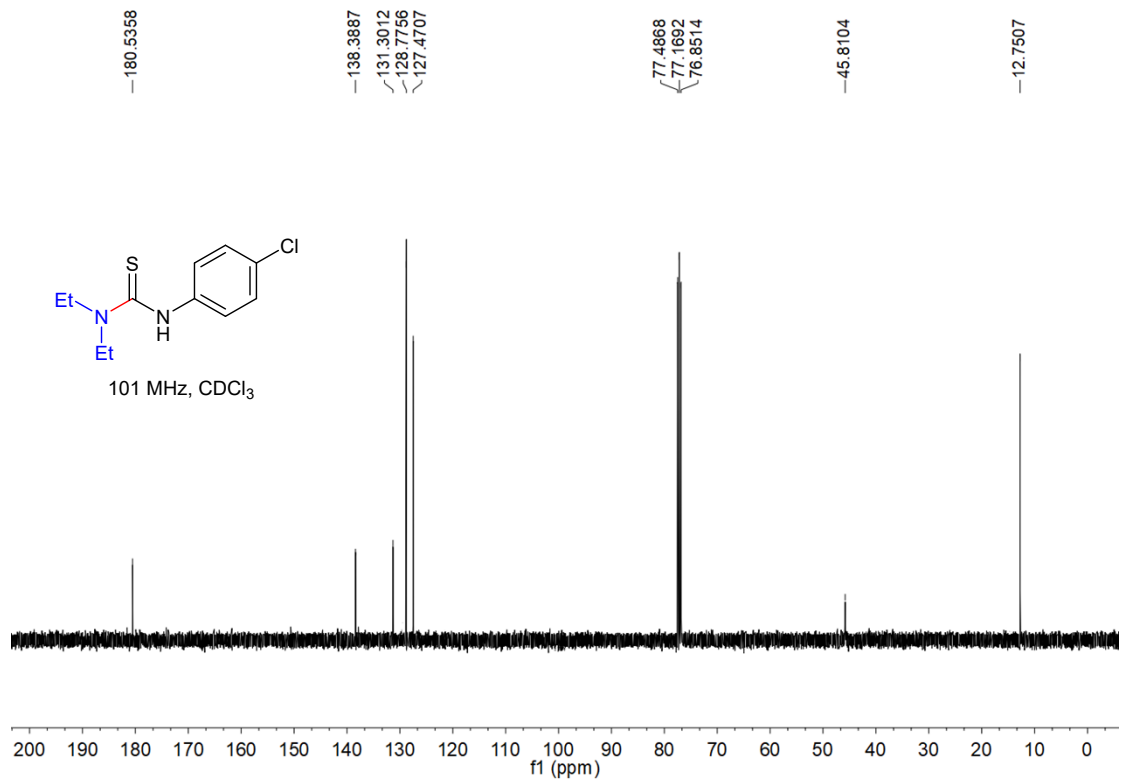

7c

<sup>1</sup>H NMR

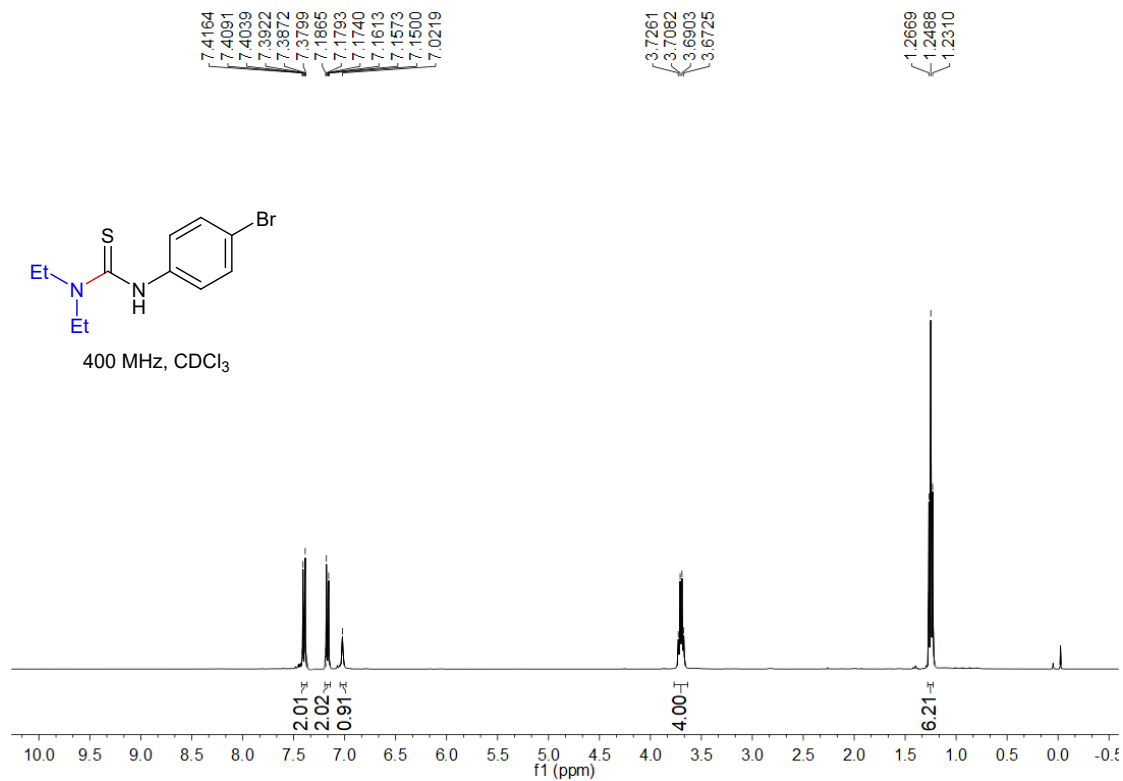

<sup>13</sup>C NMR

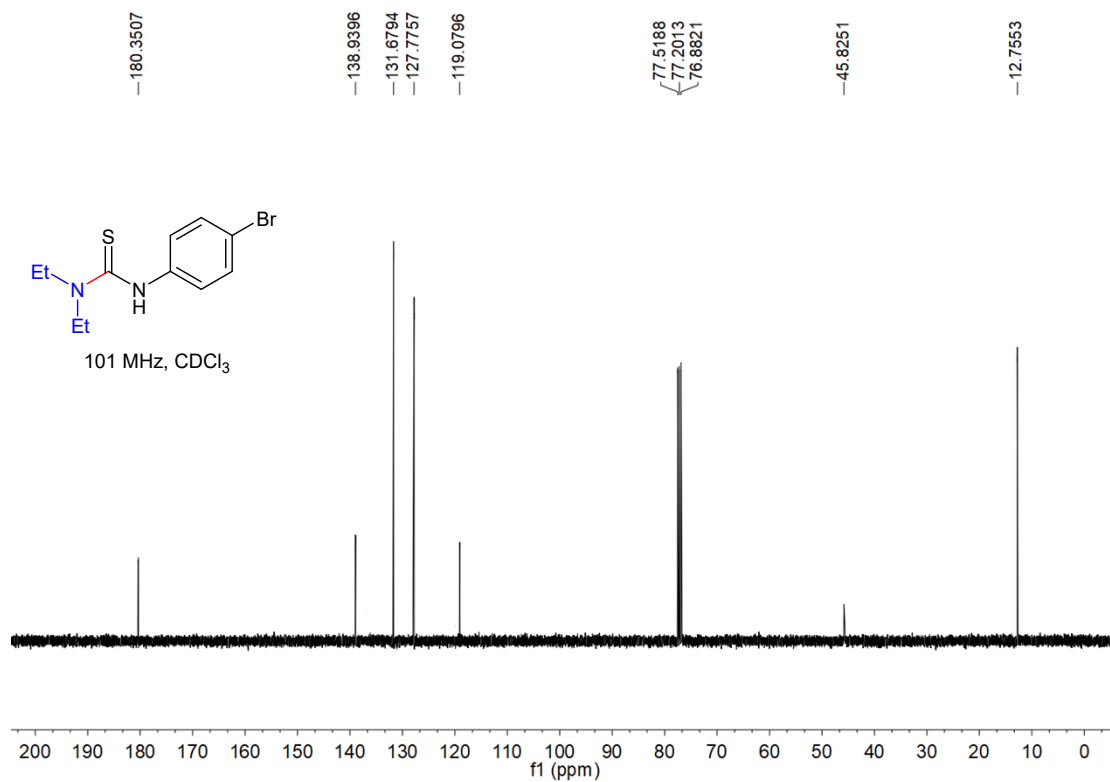

8c

<sup>1</sup>H NMR

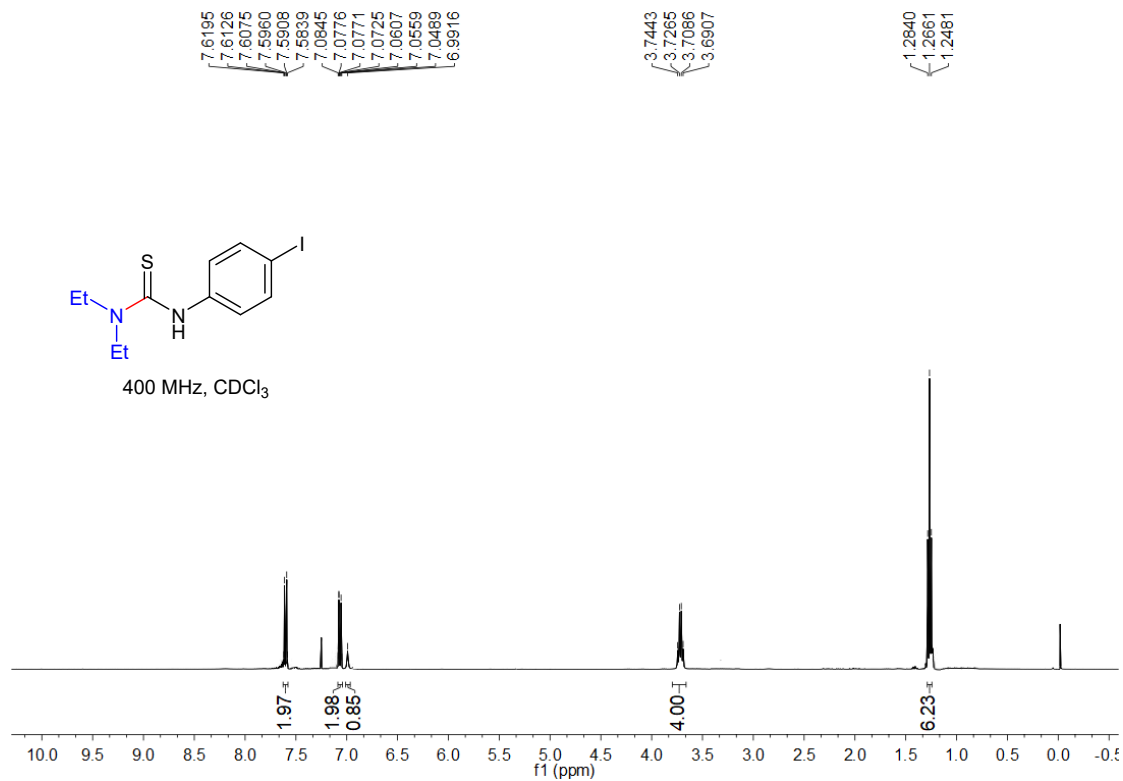

<sup>13</sup>C NMR

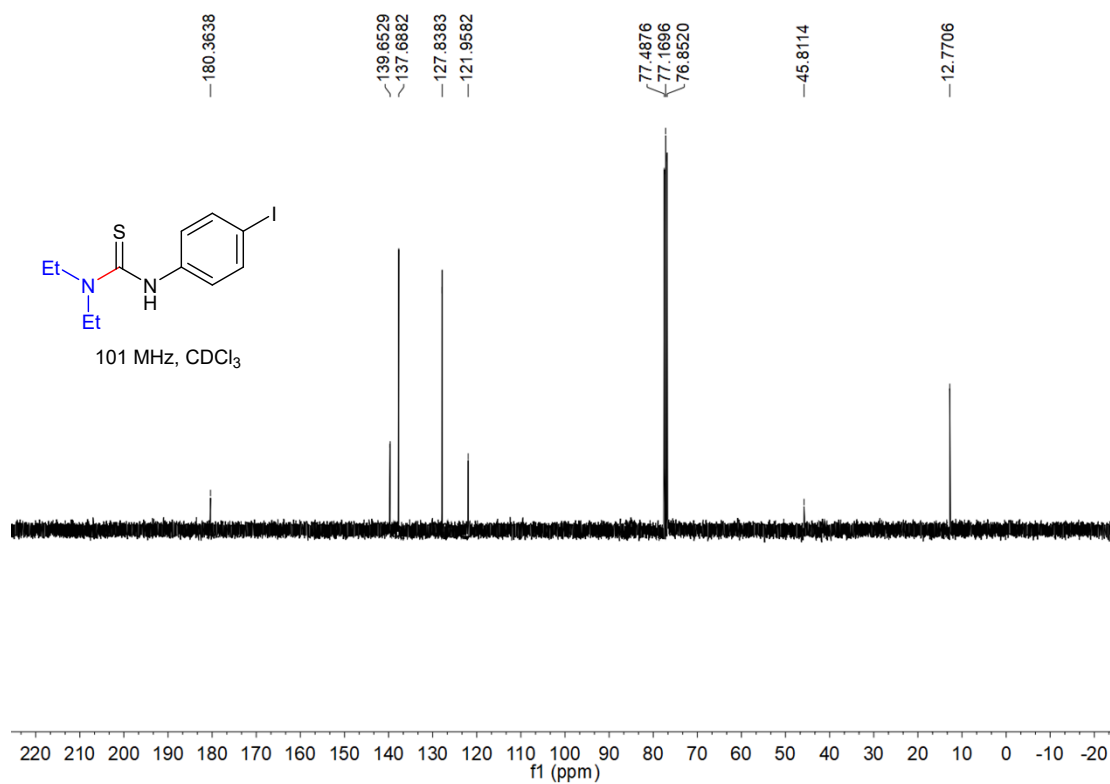

9c

<sup>1</sup>H NMR

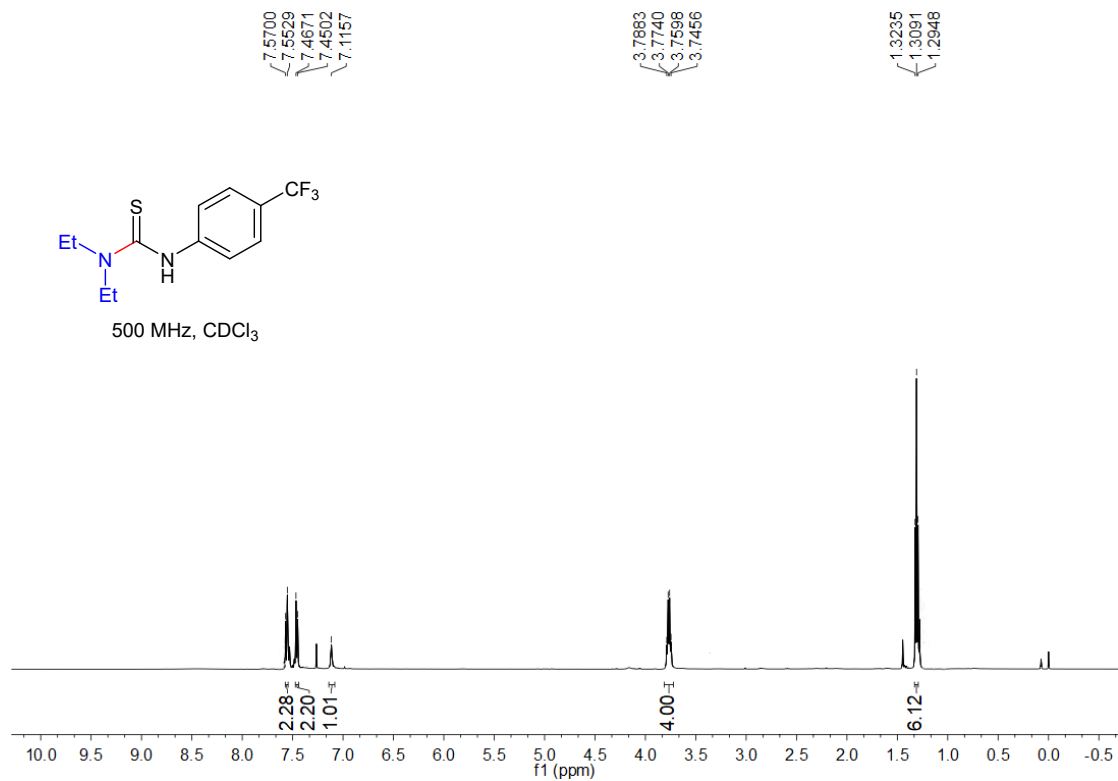

<sup>13</sup>C NMR

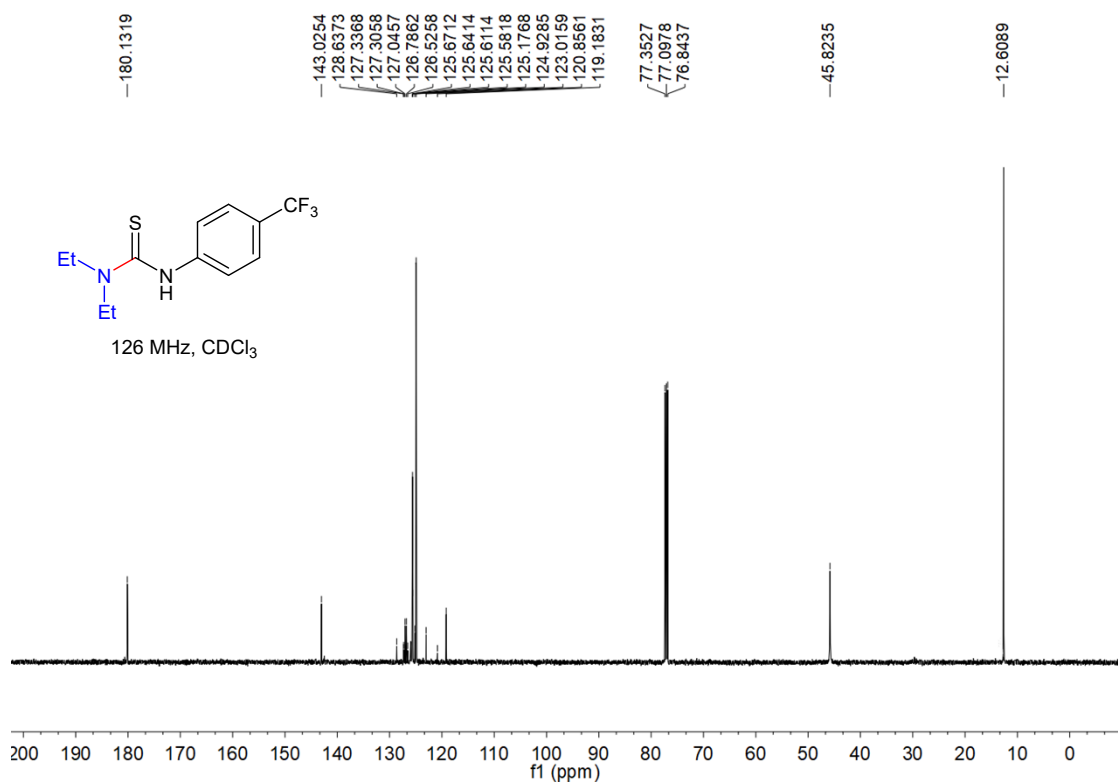

**<sup>19</sup>F NMR**

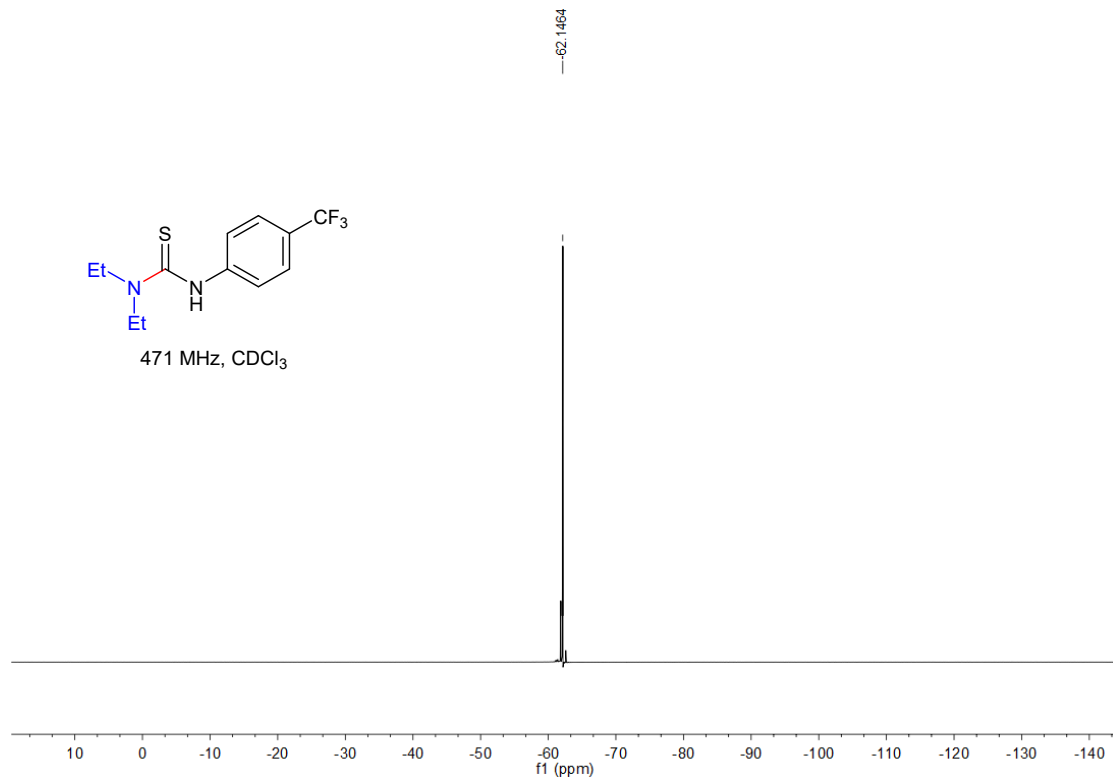

10c

<sup>1</sup>H NMR

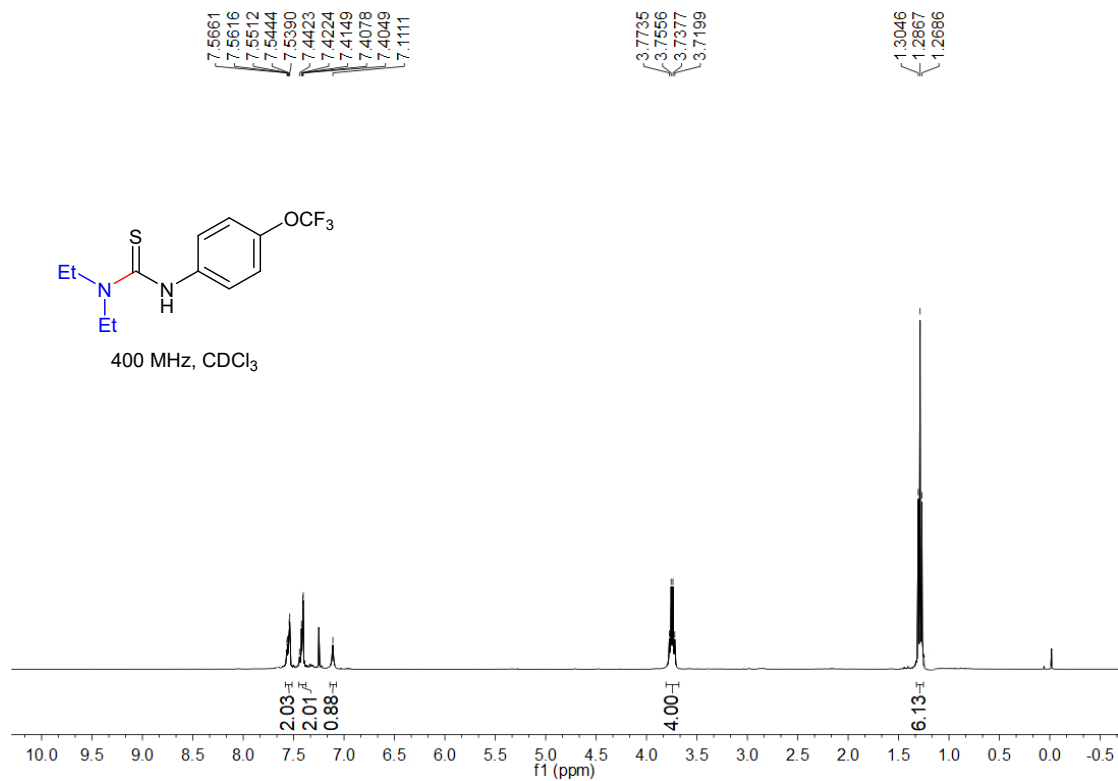

<sup>13</sup>C NMR

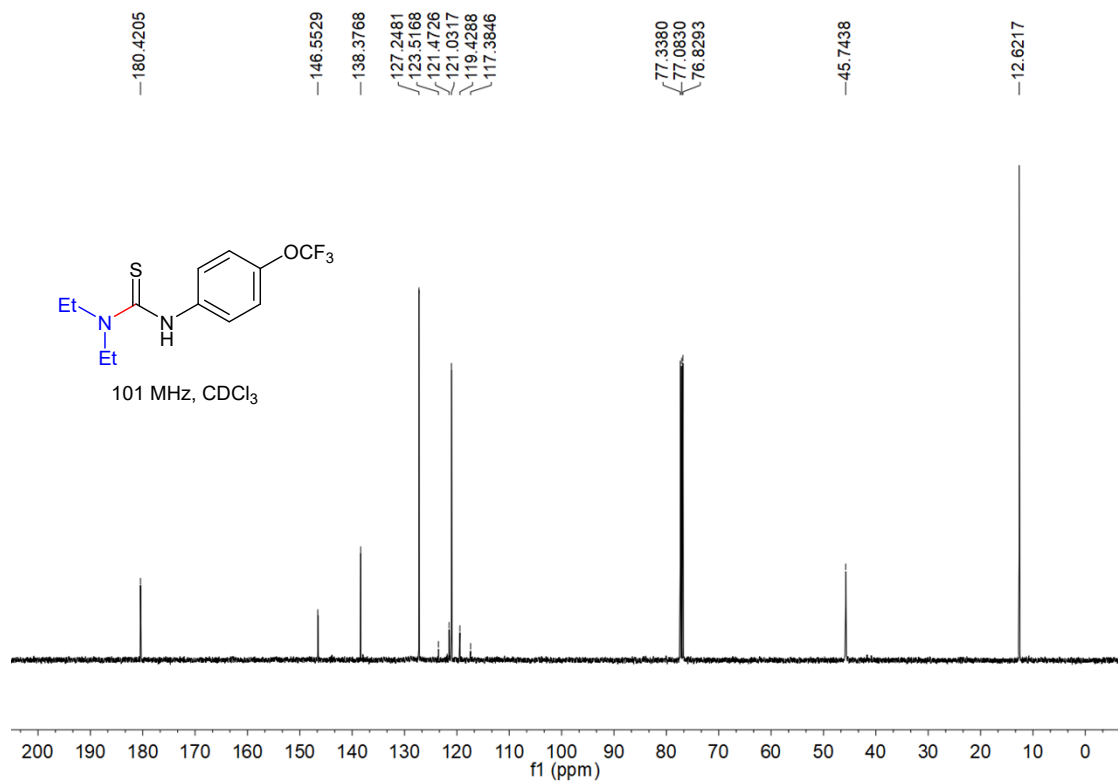

**<sup>19</sup>F NMR**

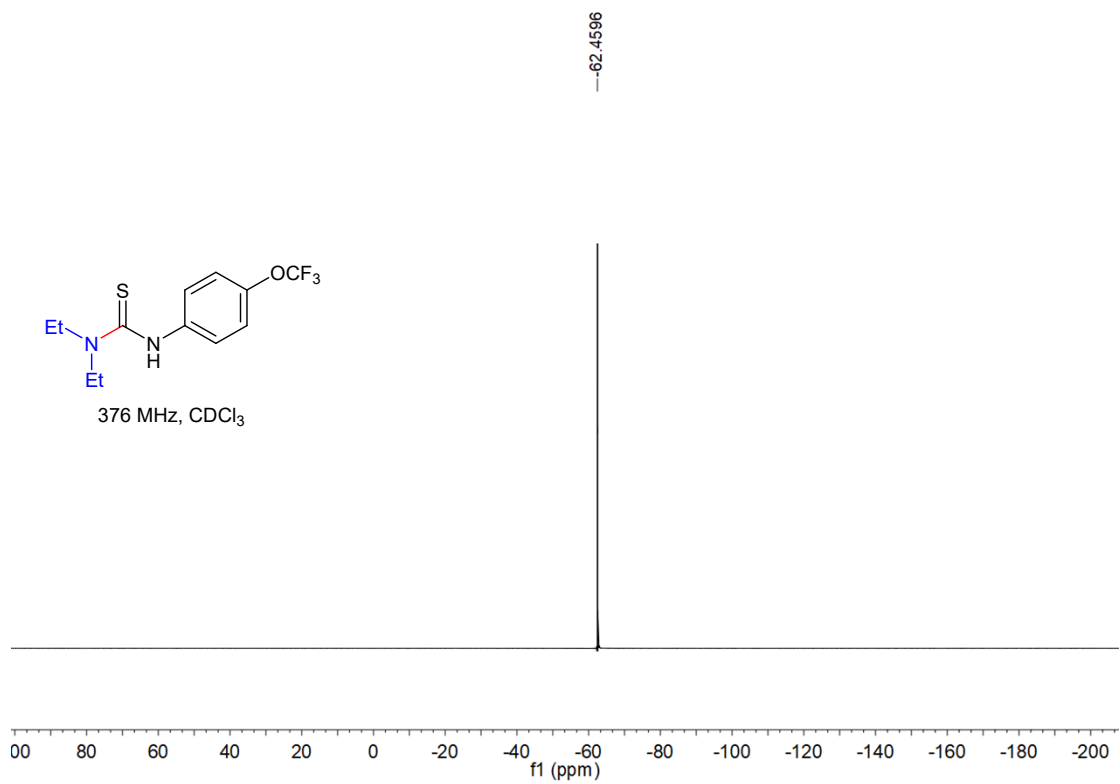

# 11c

## <sup>1</sup>H NMR

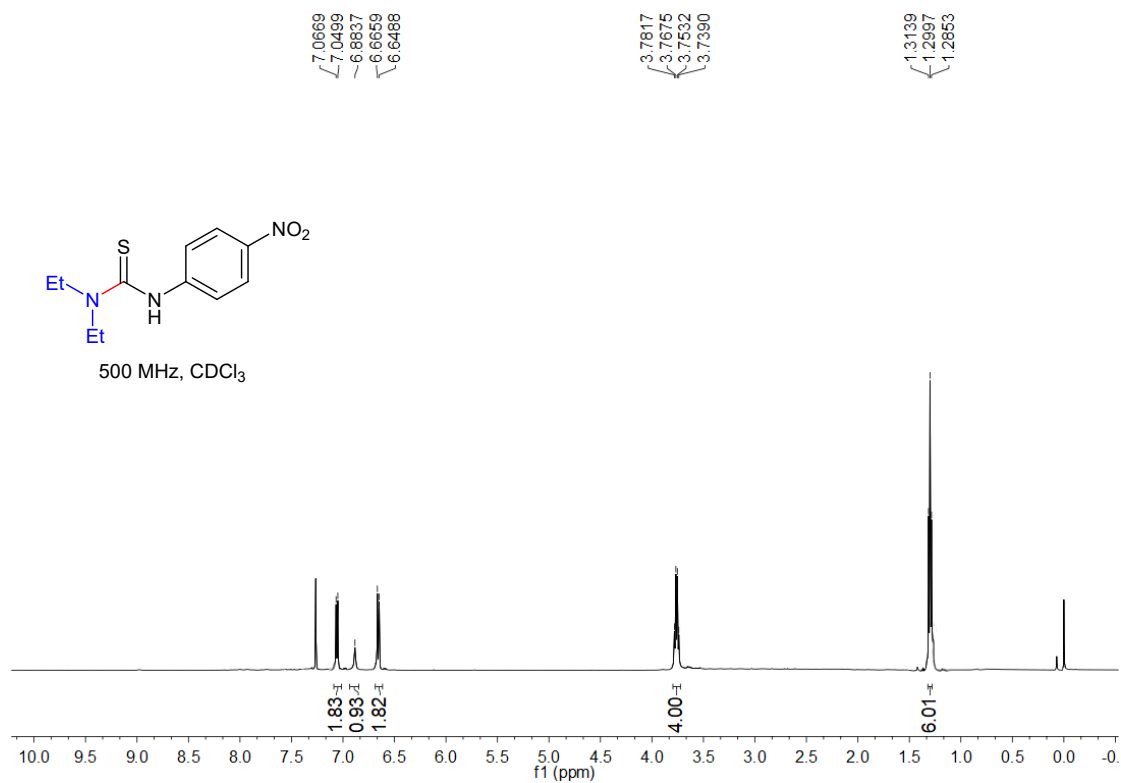

## <sup>13</sup>C NMR

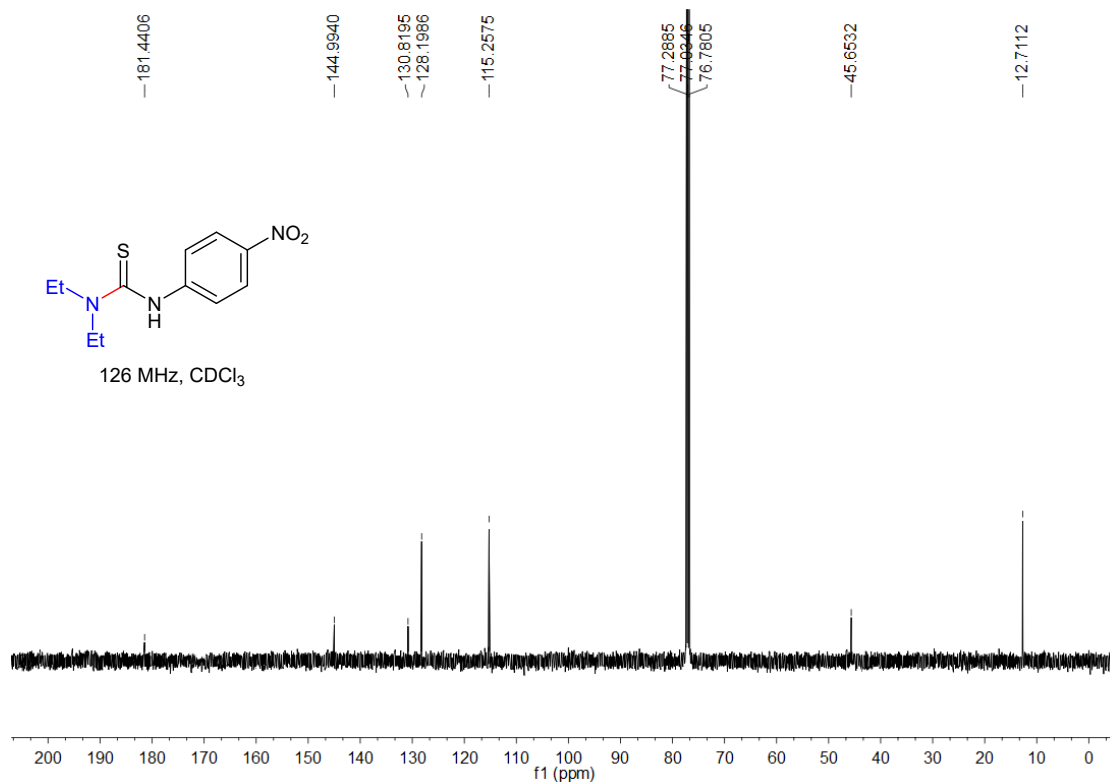



# 12c

## <sup>1</sup>H NMR

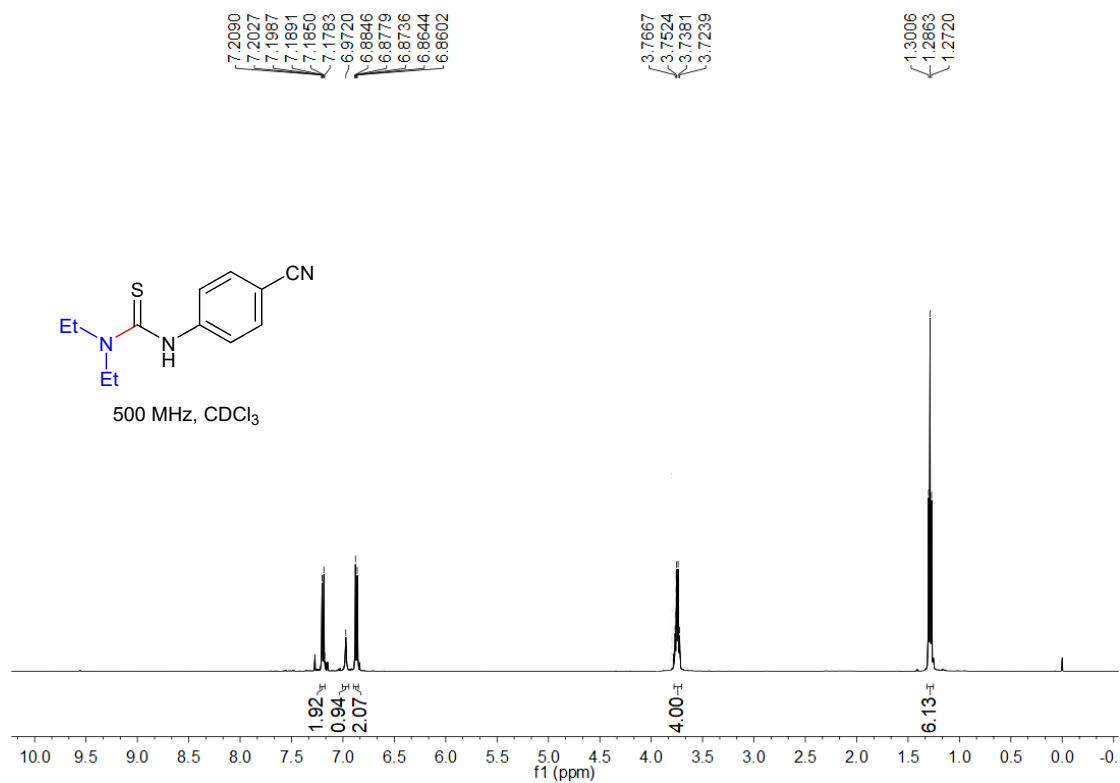

## <sup>13</sup>C NMR

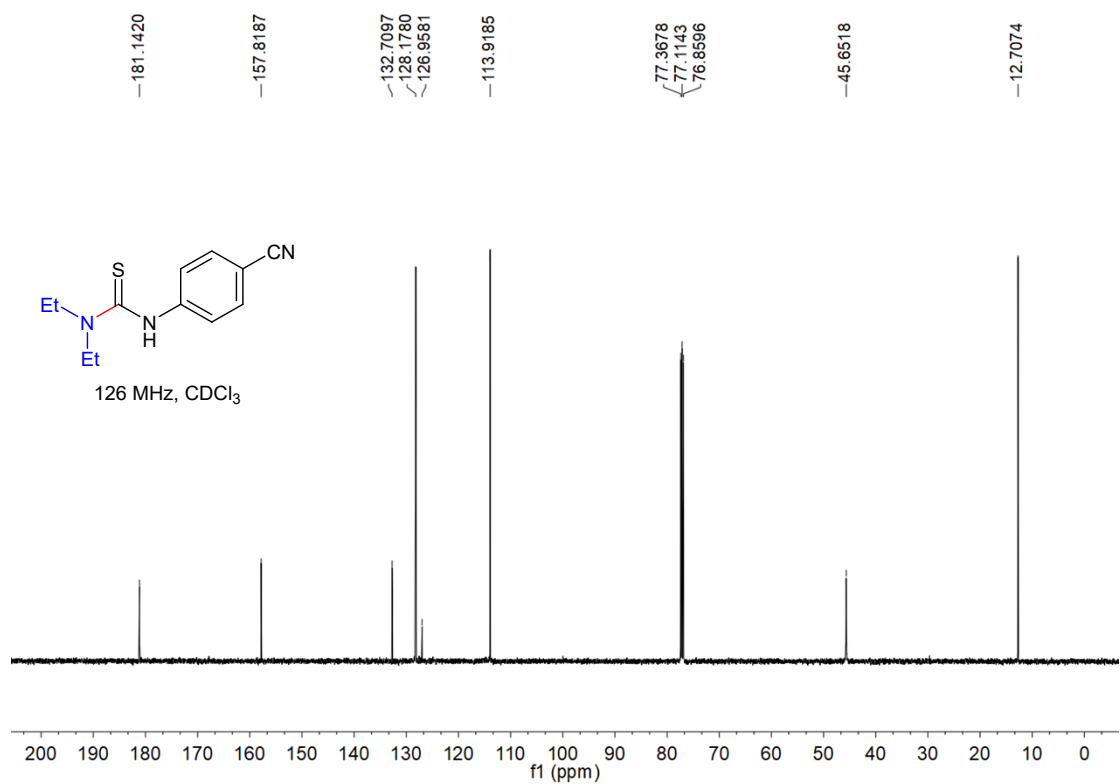

13c

<sup>1</sup>H NMR

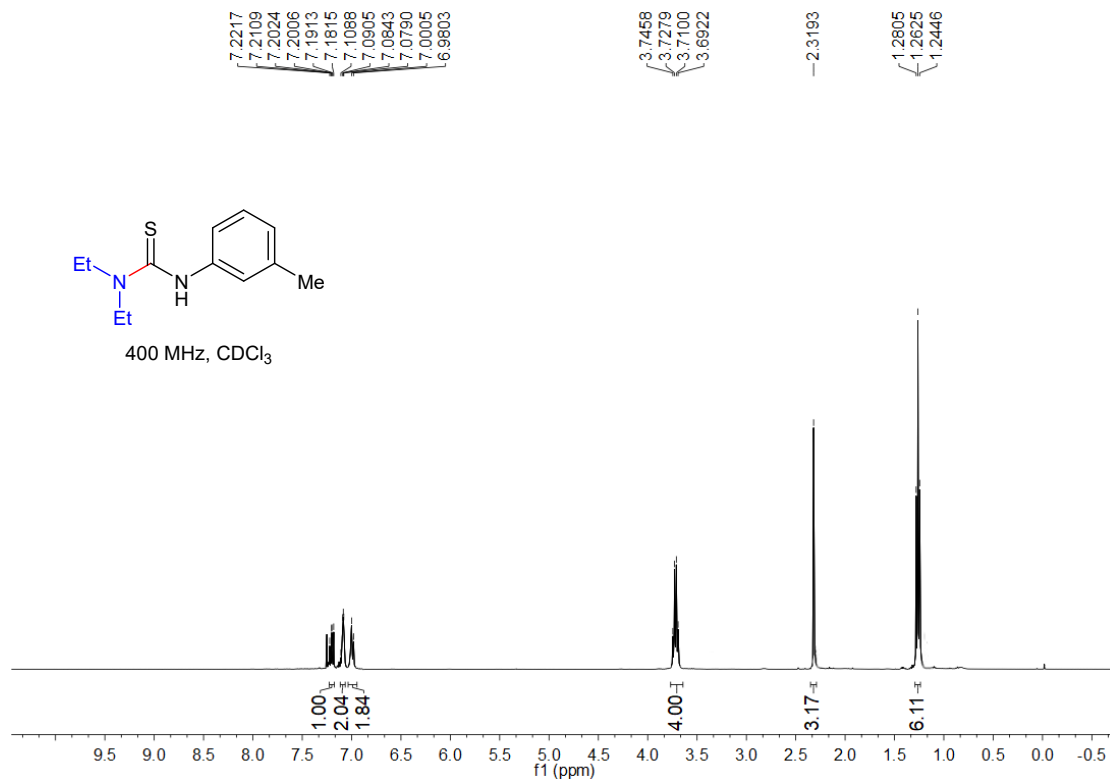

<sup>13</sup>C NMR

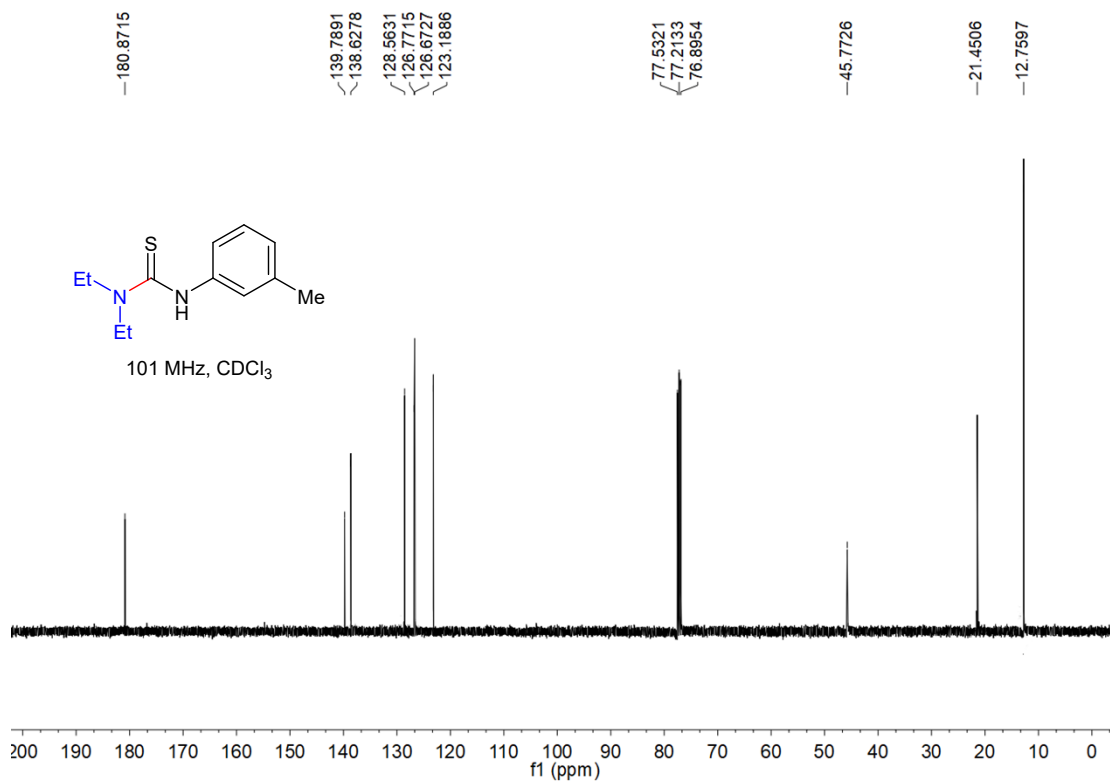

## 14c

<sup>1</sup>H NMR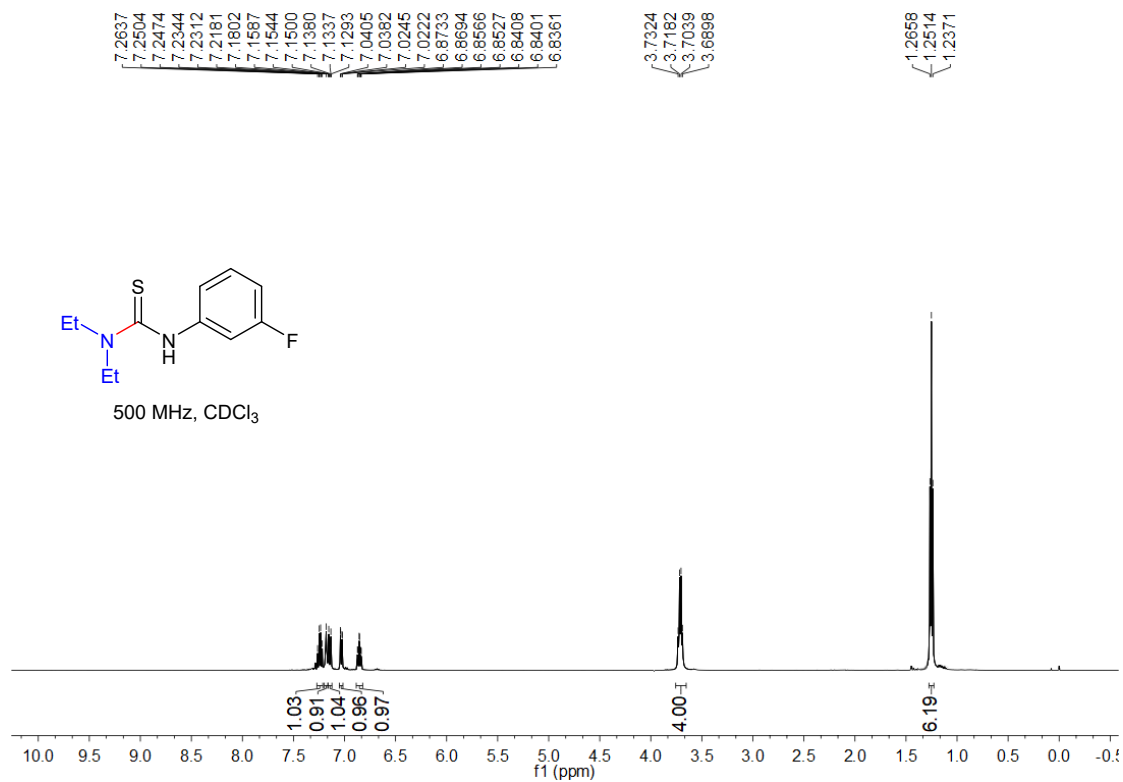<sup>13</sup>C NMR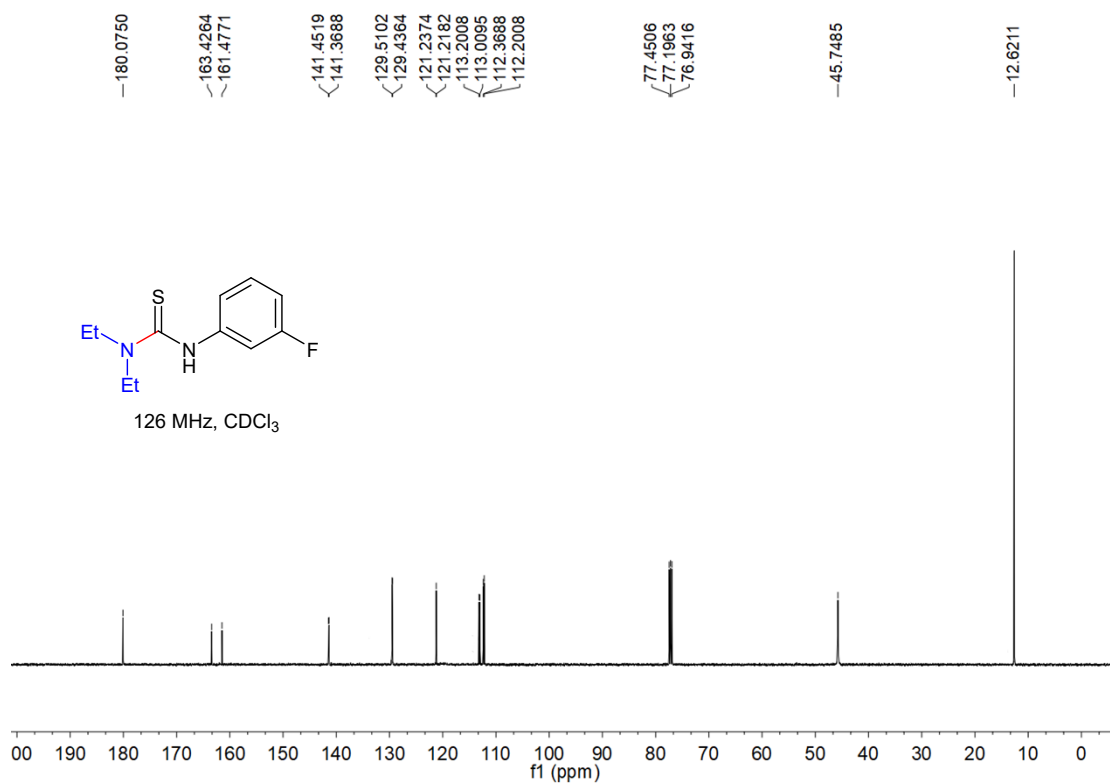

**<sup>19</sup>F NMR**

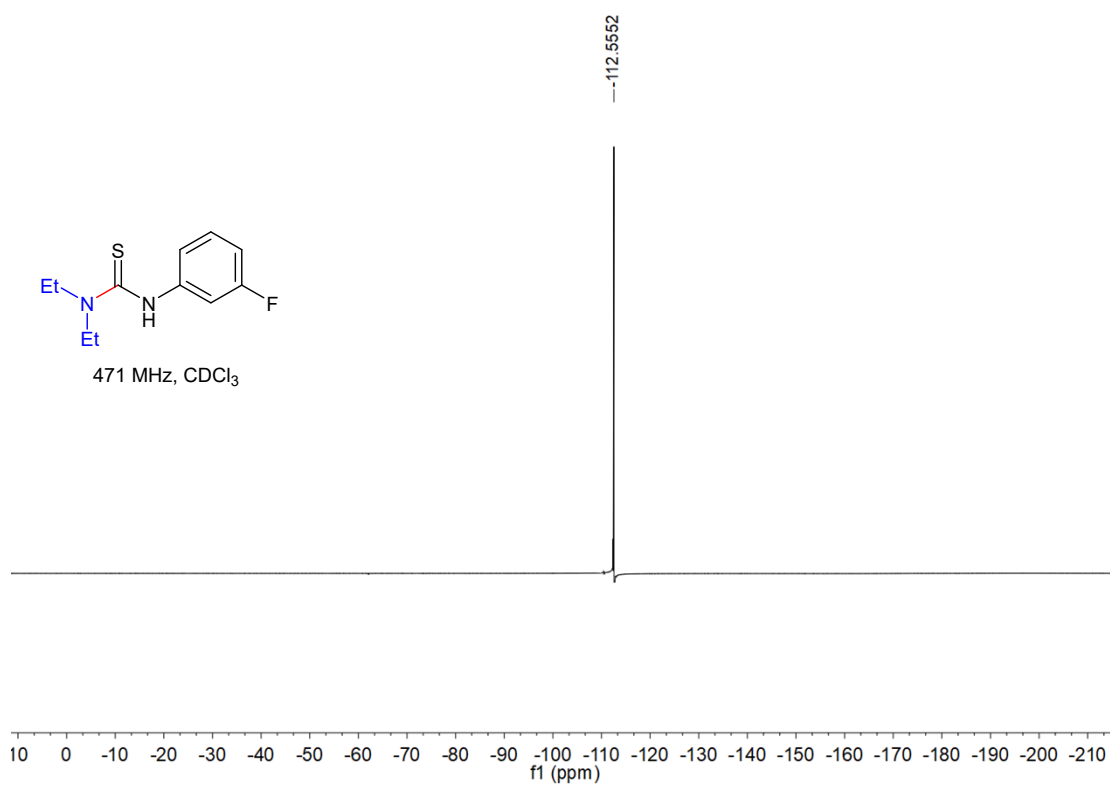

15c

<sup>1</sup>H NMR

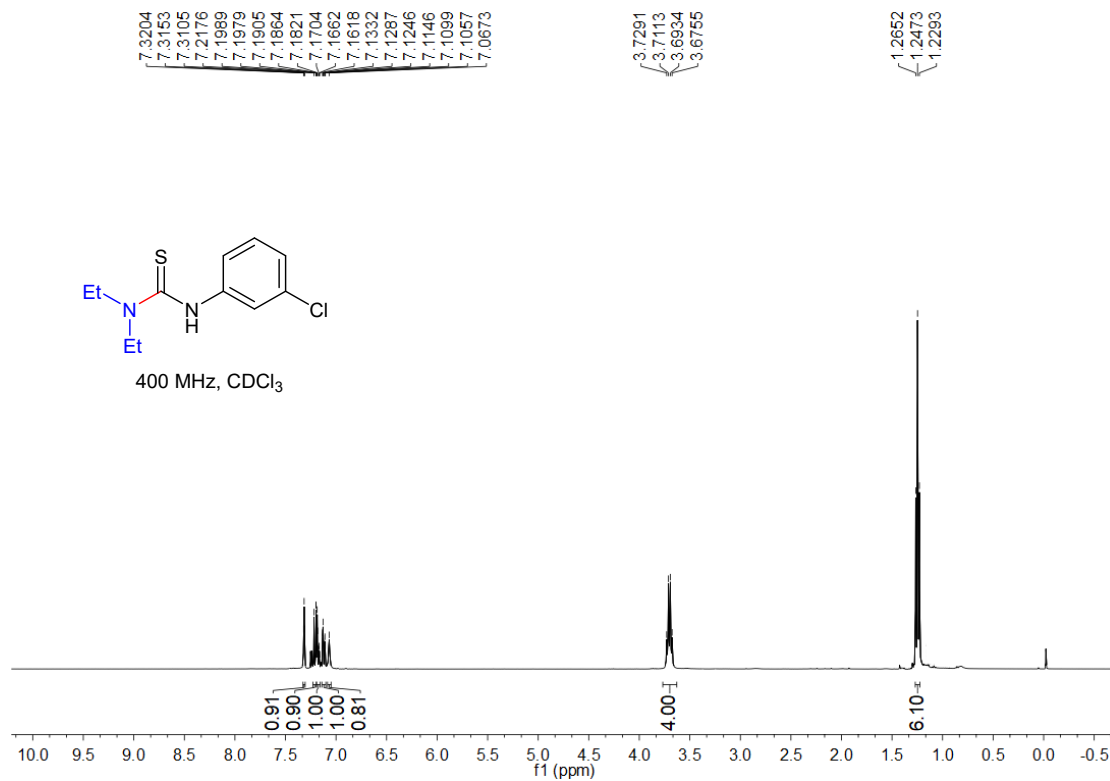

<sup>13</sup>C NMR

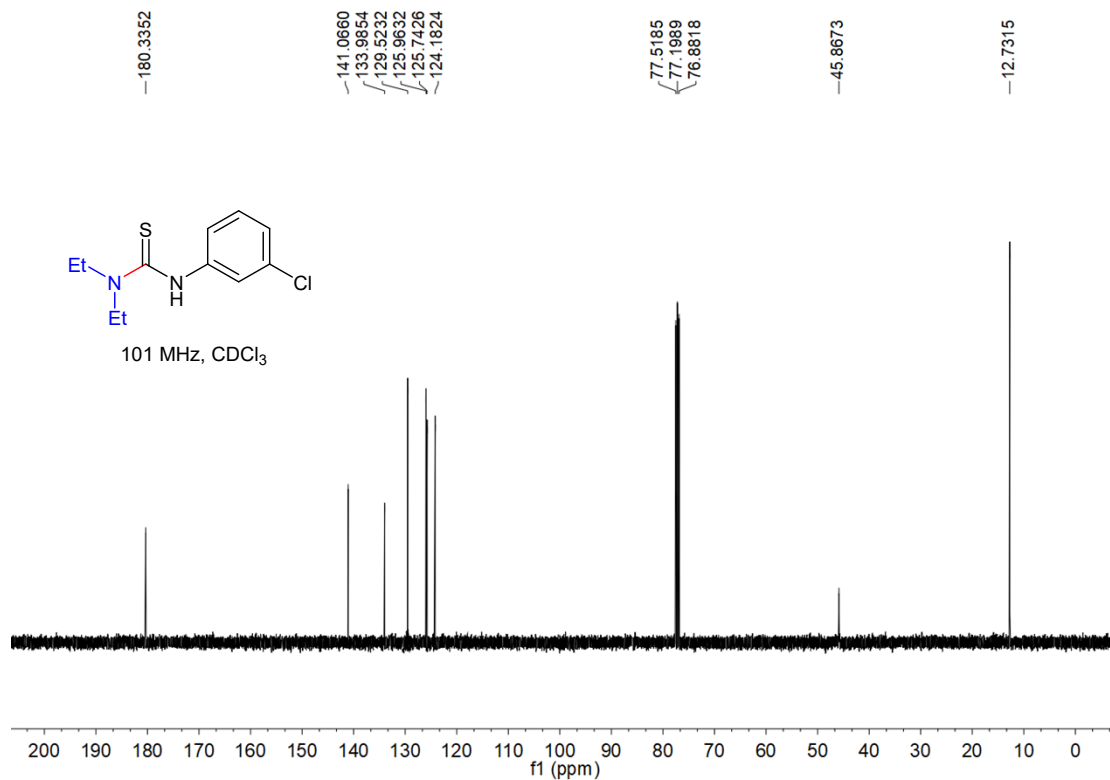

16c

<sup>1</sup>H NMR

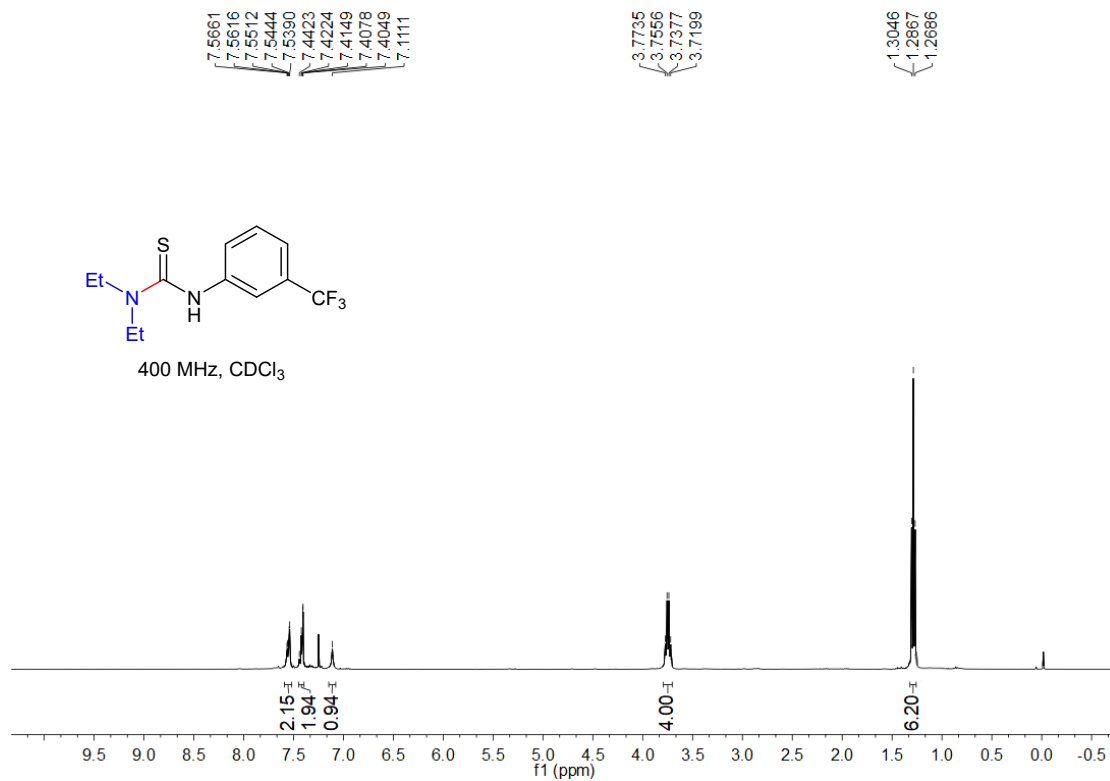

<sup>13</sup>C NMR

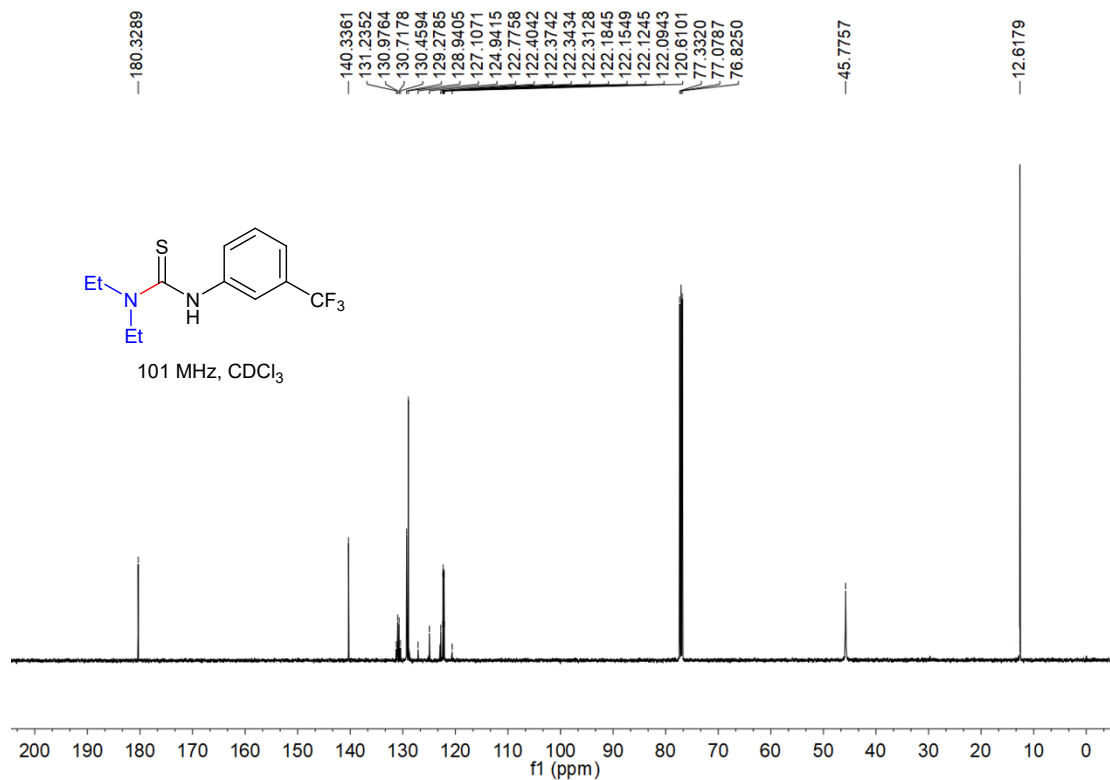

**<sup>19</sup>F NMR**

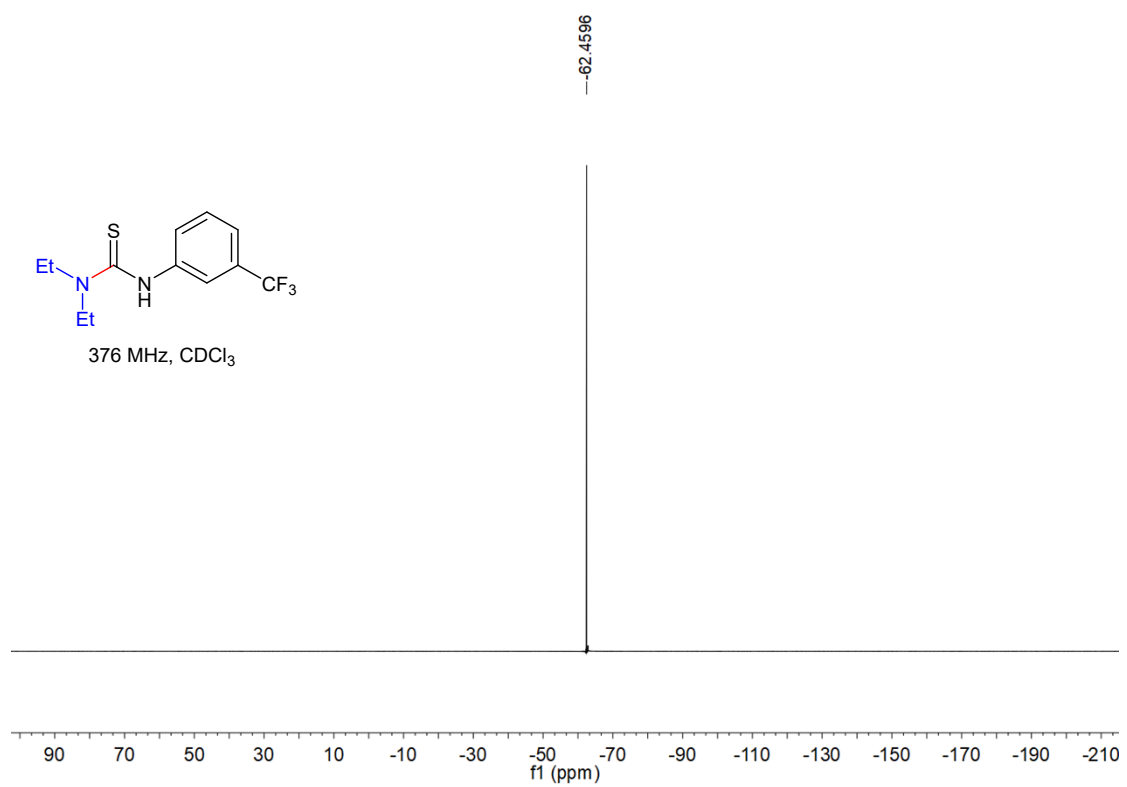

17c

<sup>1</sup>H NMR

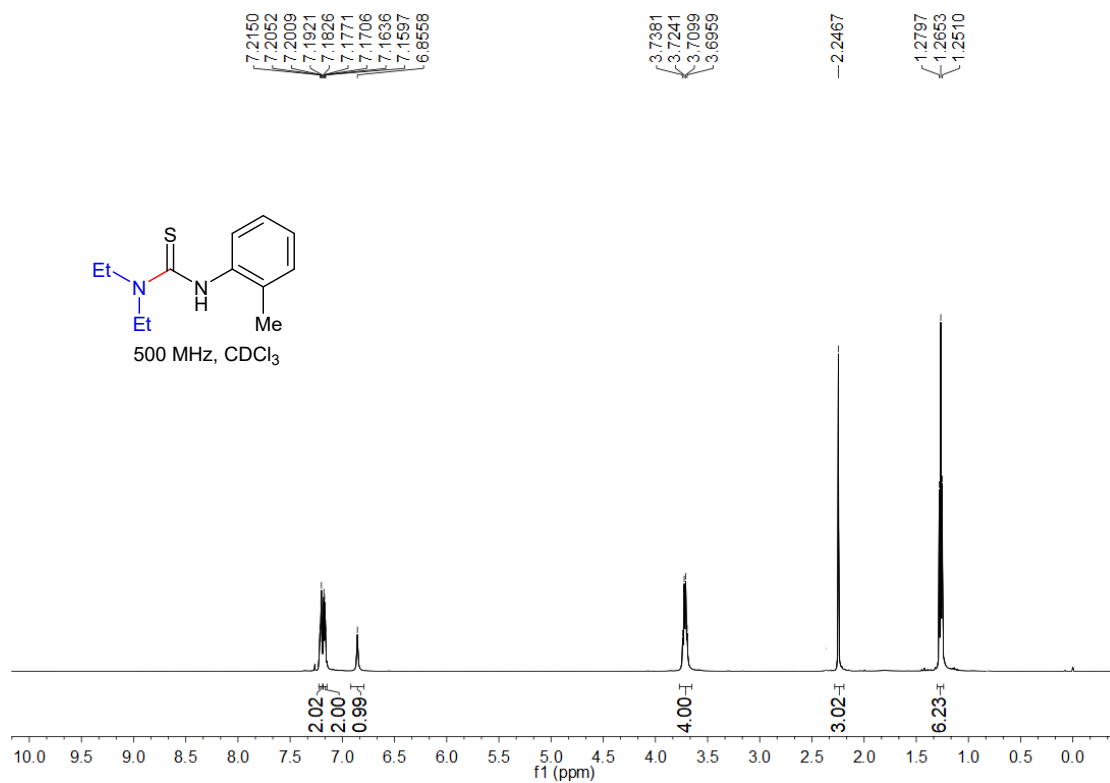

<sup>13</sup>C NMR

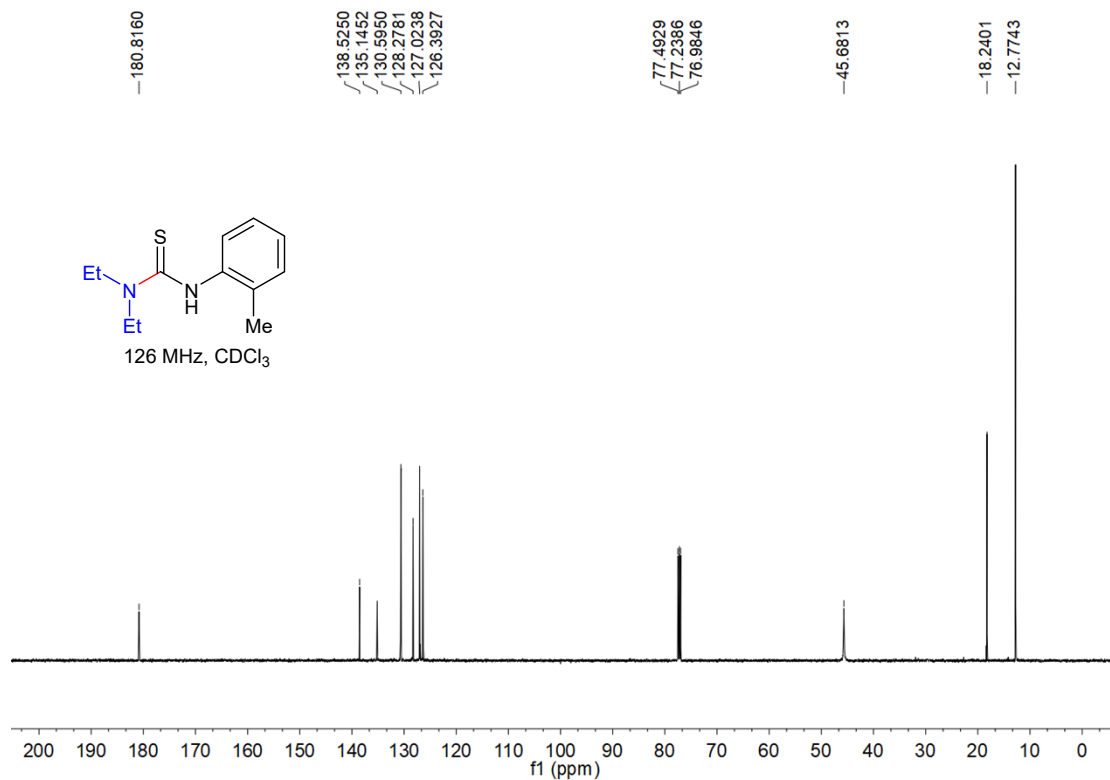



18c

<sup>1</sup>H NMR

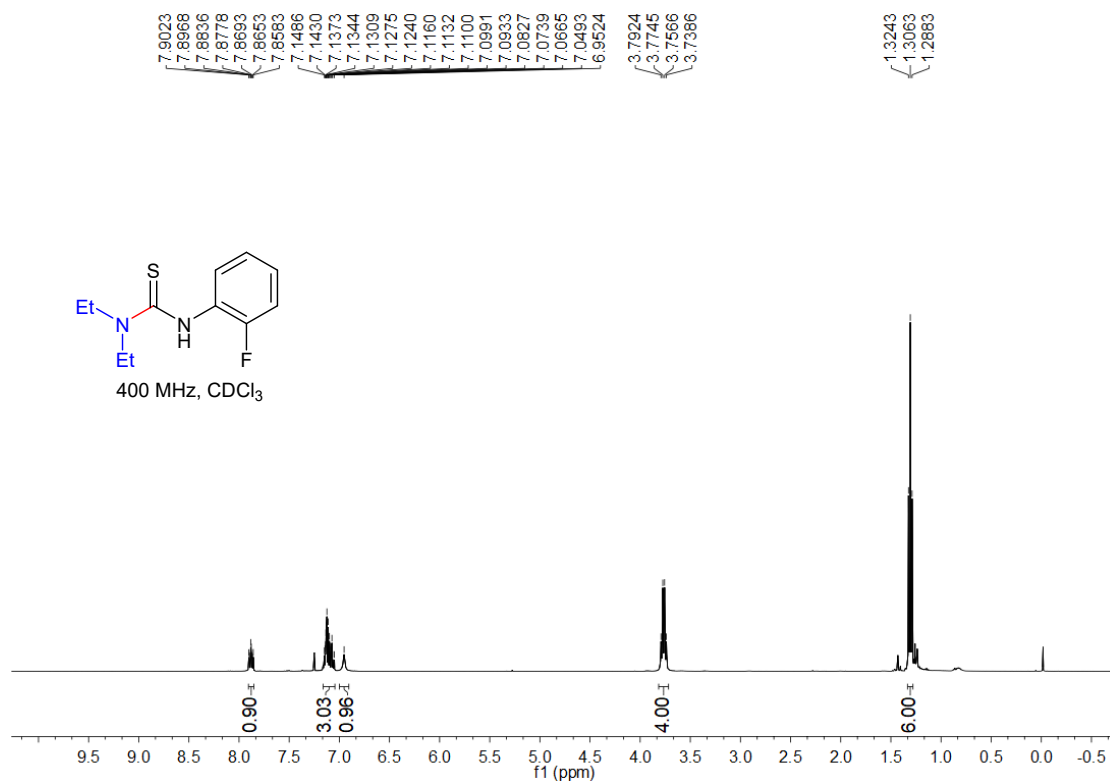

<sup>13</sup>C NMR

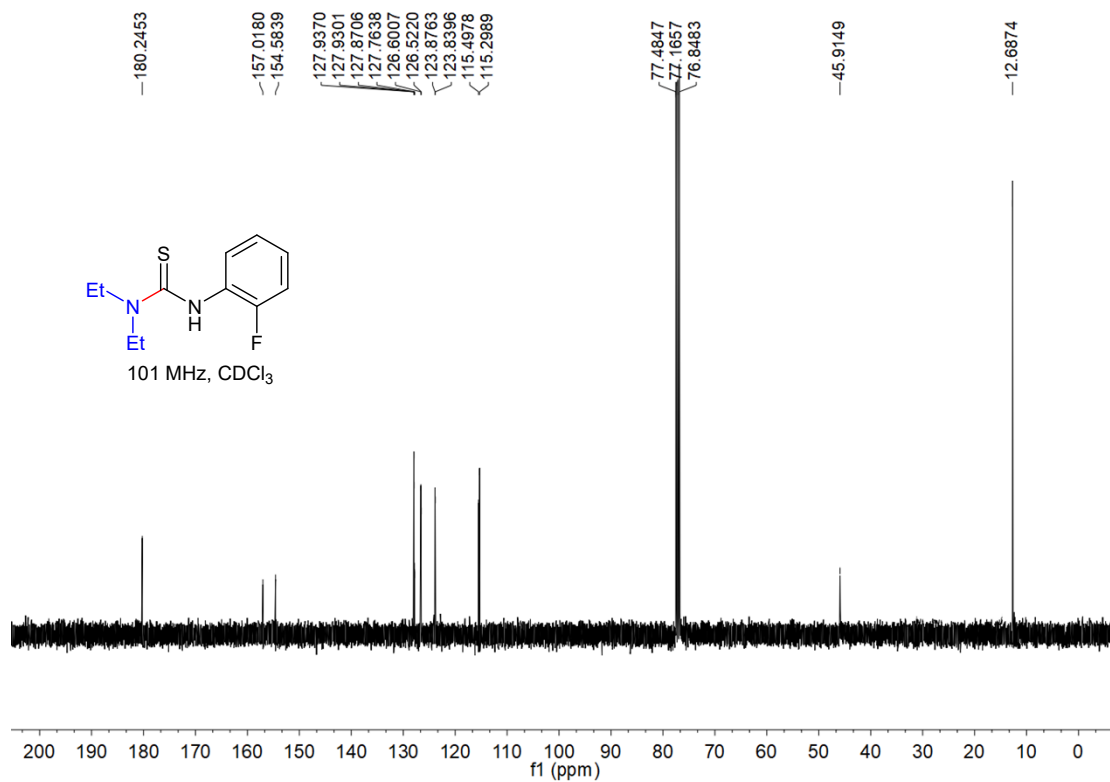

**<sup>19</sup>F NMR**

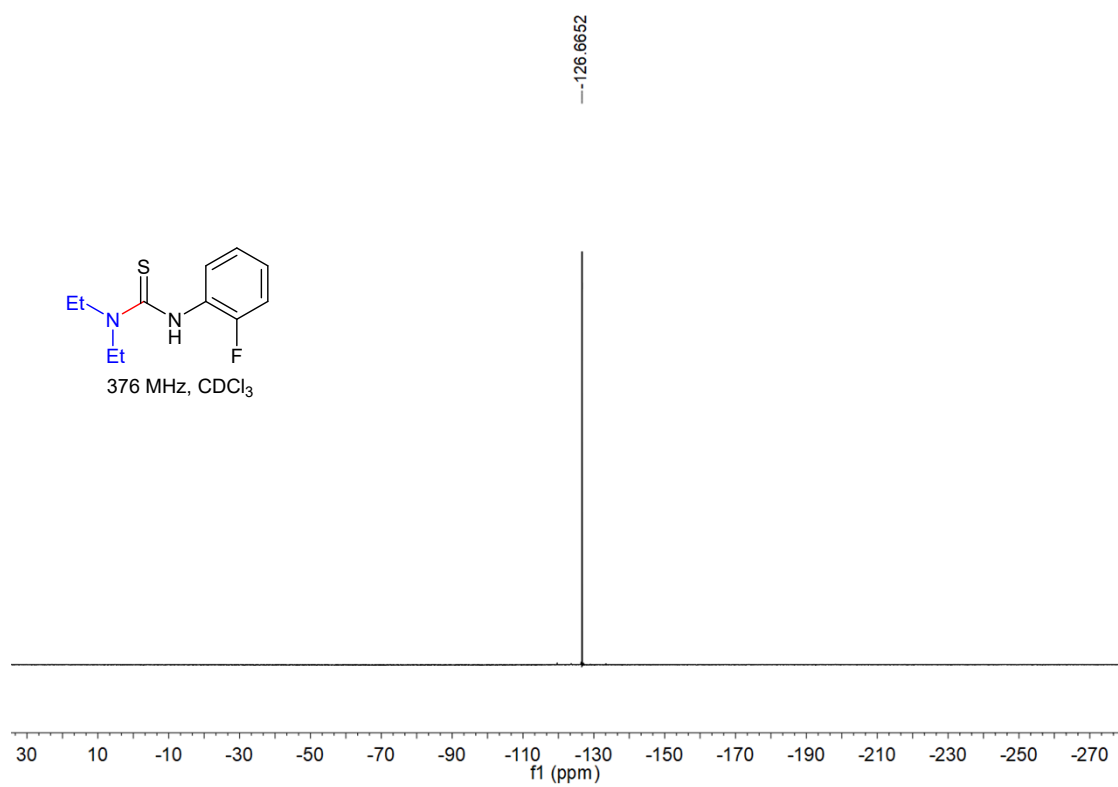

19c

<sup>1</sup>H NMR

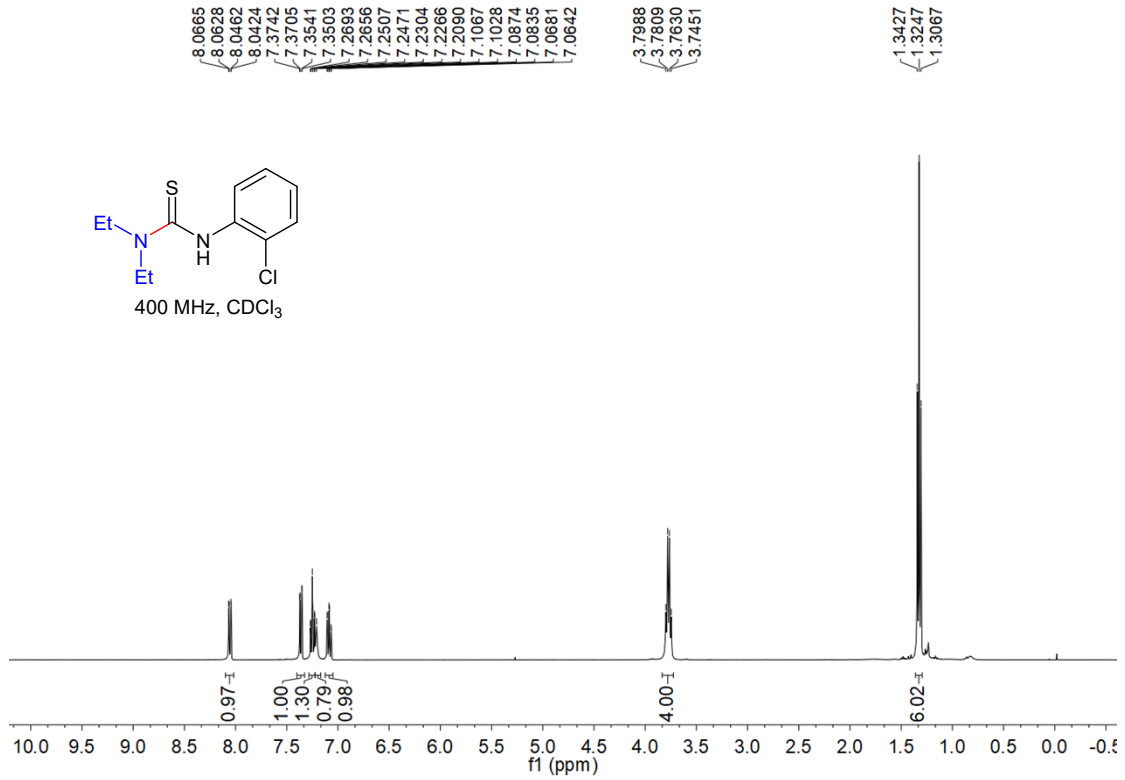

<sup>13</sup>C NMR

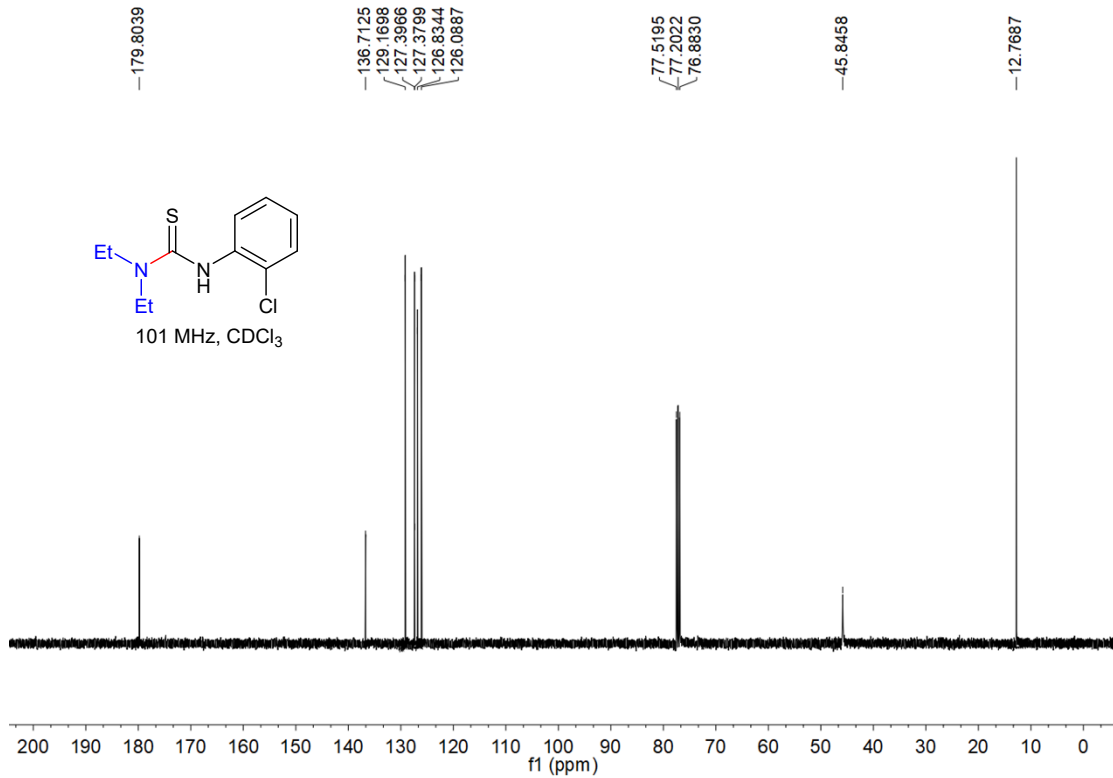

## 20c

 $^1\text{H NMR}$ 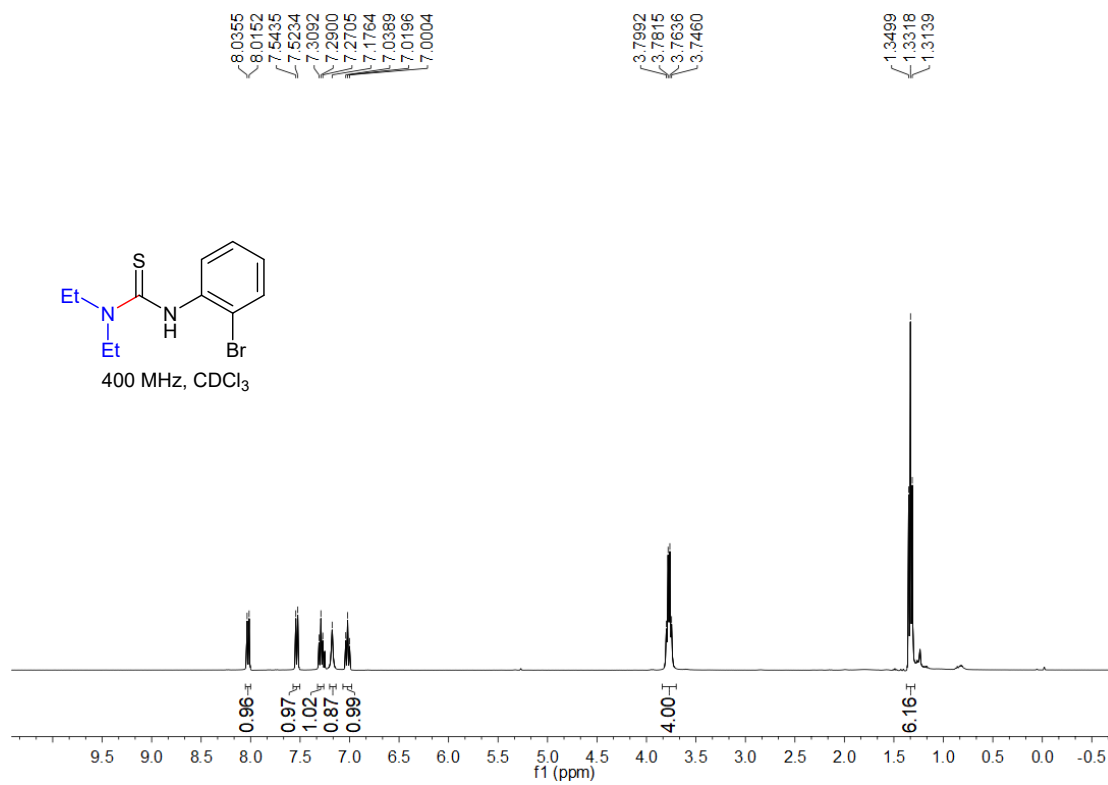 $^{13}\text{C NMR}$ 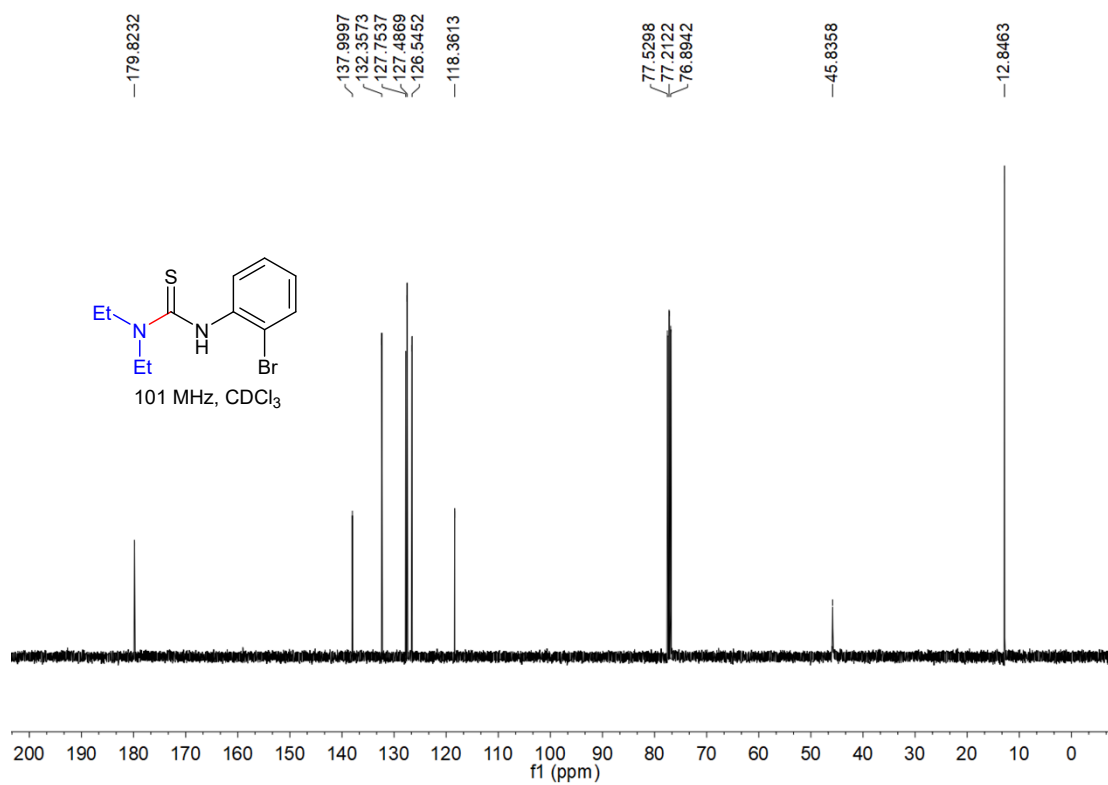

21c

<sup>1</sup>H NMR

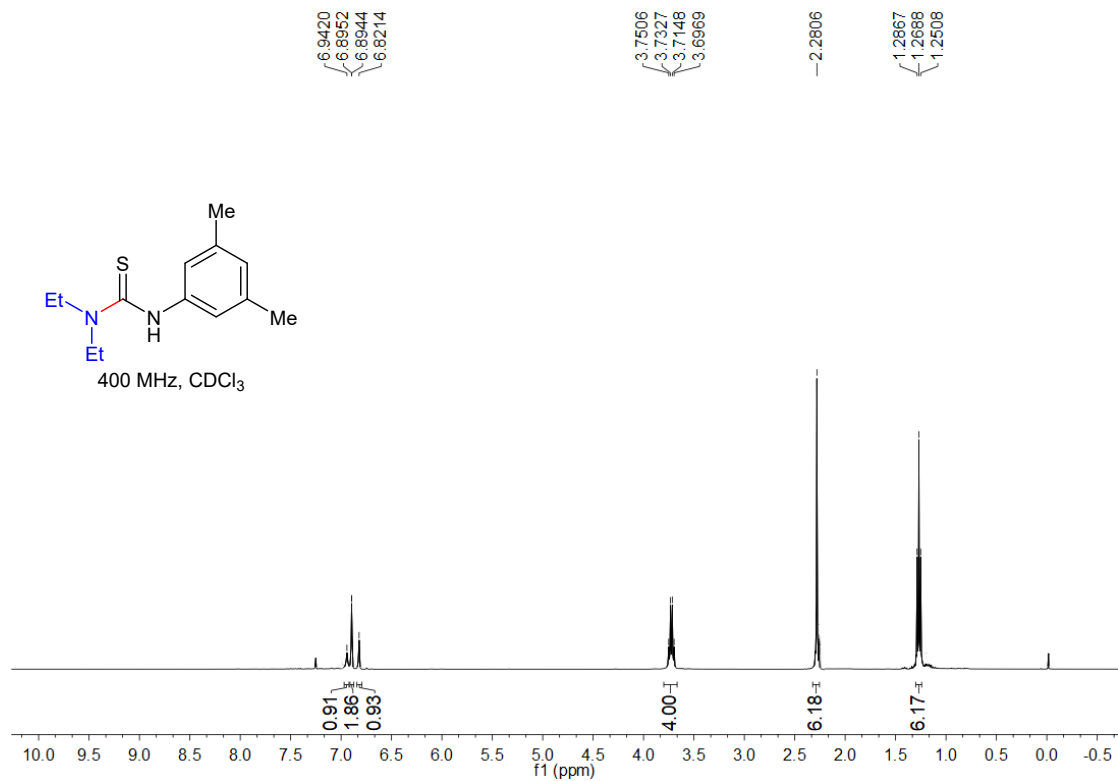

<sup>13</sup>C NMR

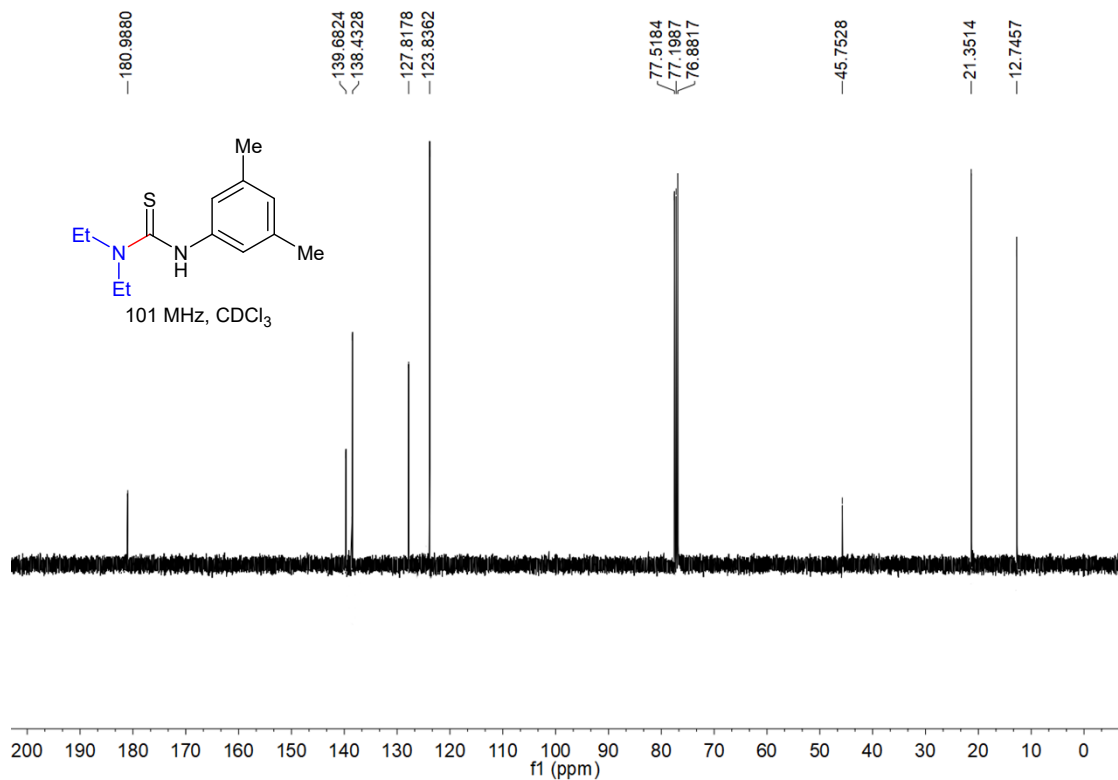

22c

<sup>1</sup>H NMR

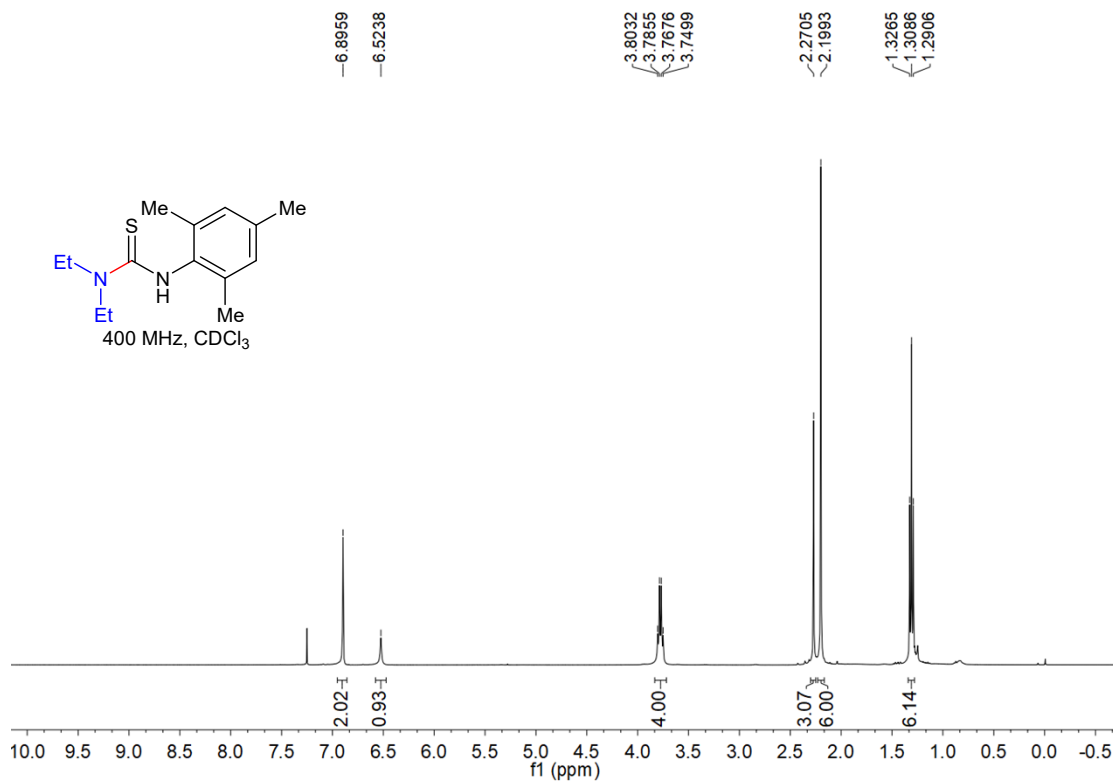

<sup>13</sup>C NMR

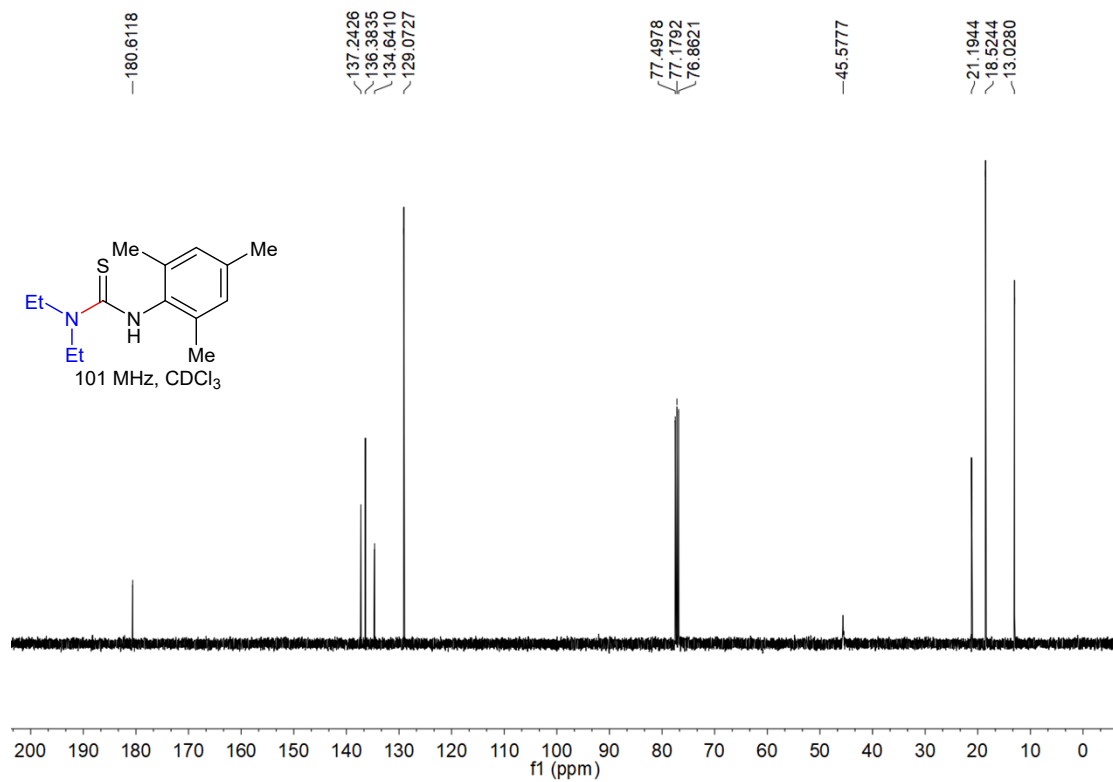

23c

<sup>1</sup>H NMR

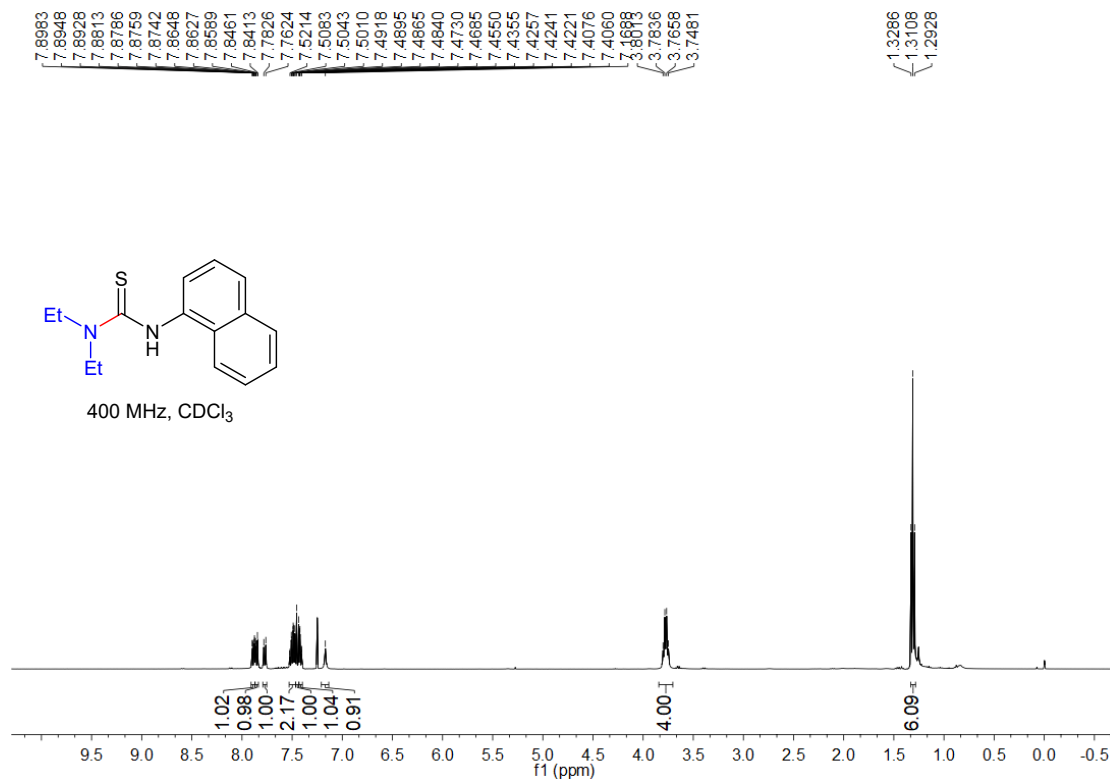

<sup>13</sup>C NMR

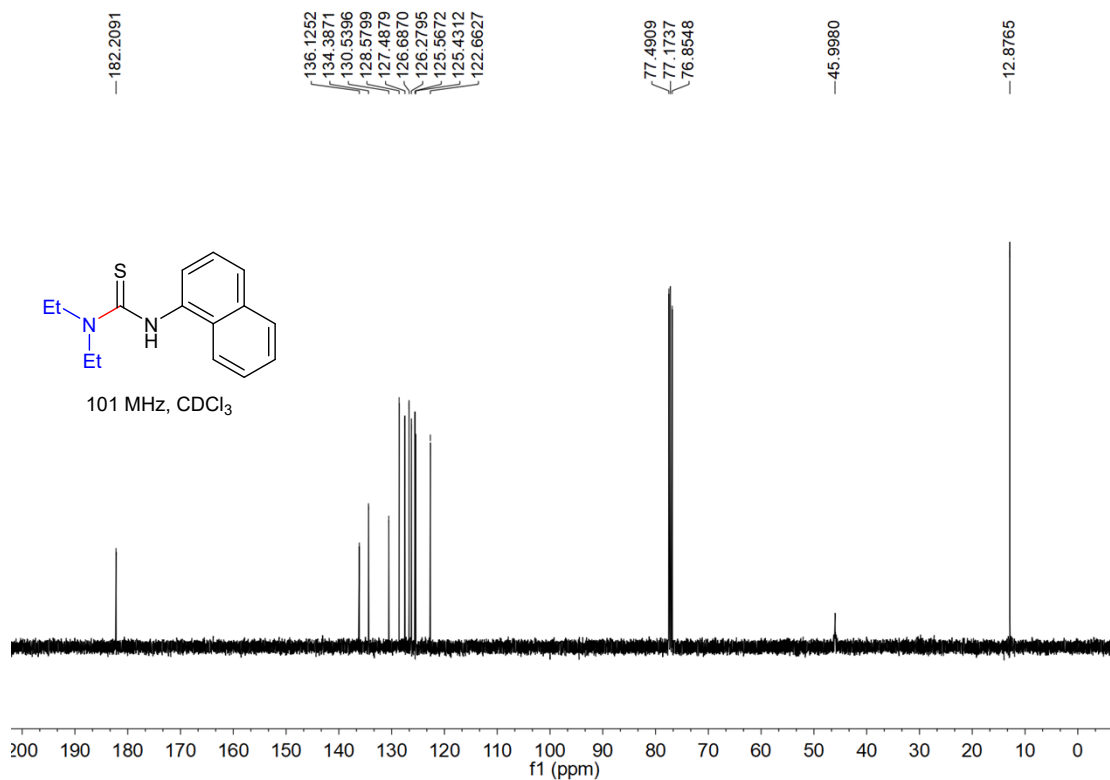

## 24c

<sup>1</sup>H NMR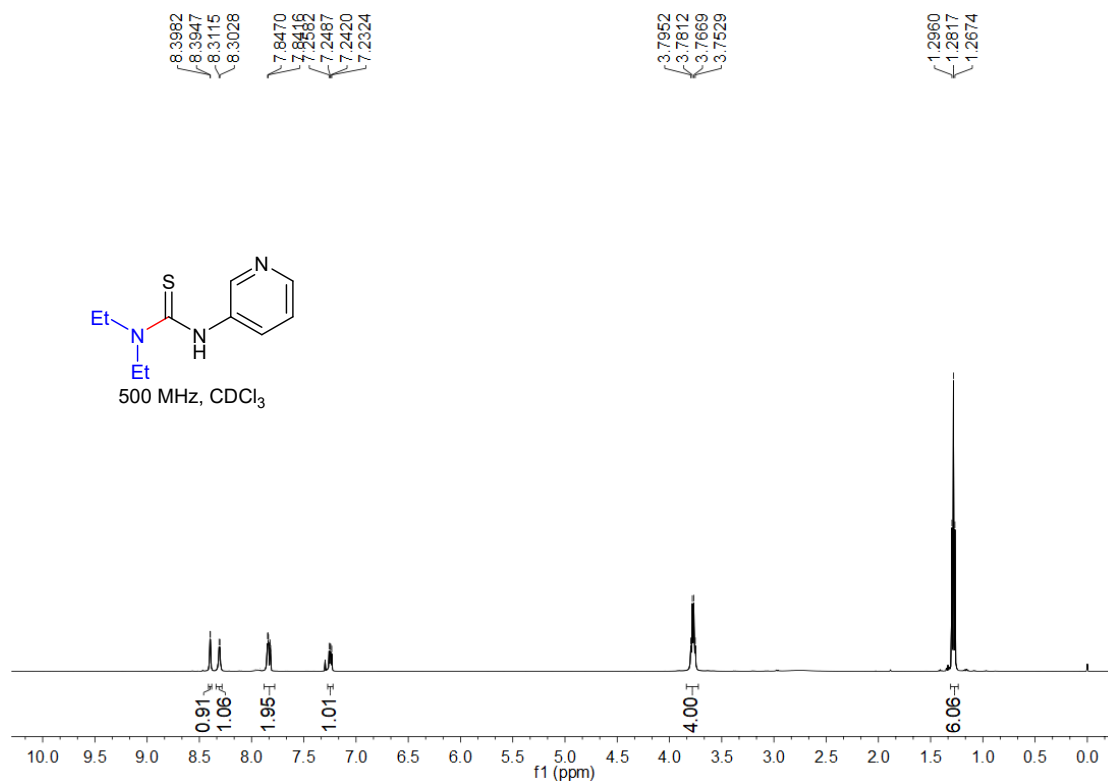<sup>13</sup>C NMR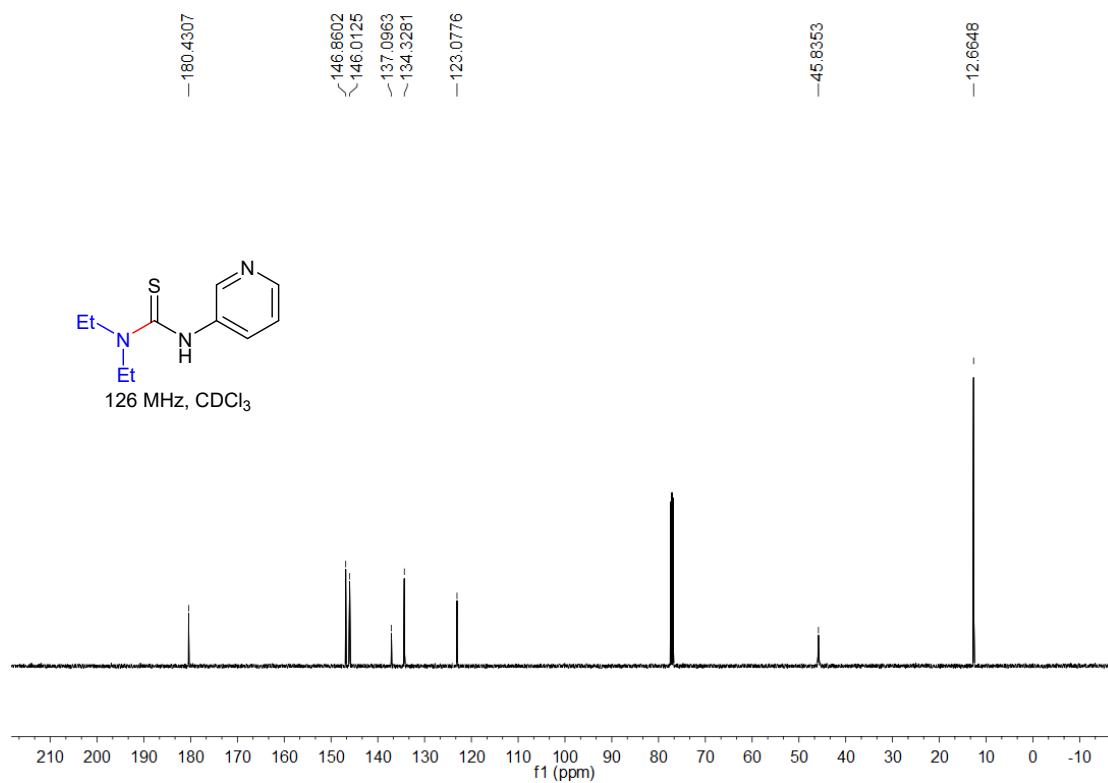



## 25c

<sup>1</sup>H NMR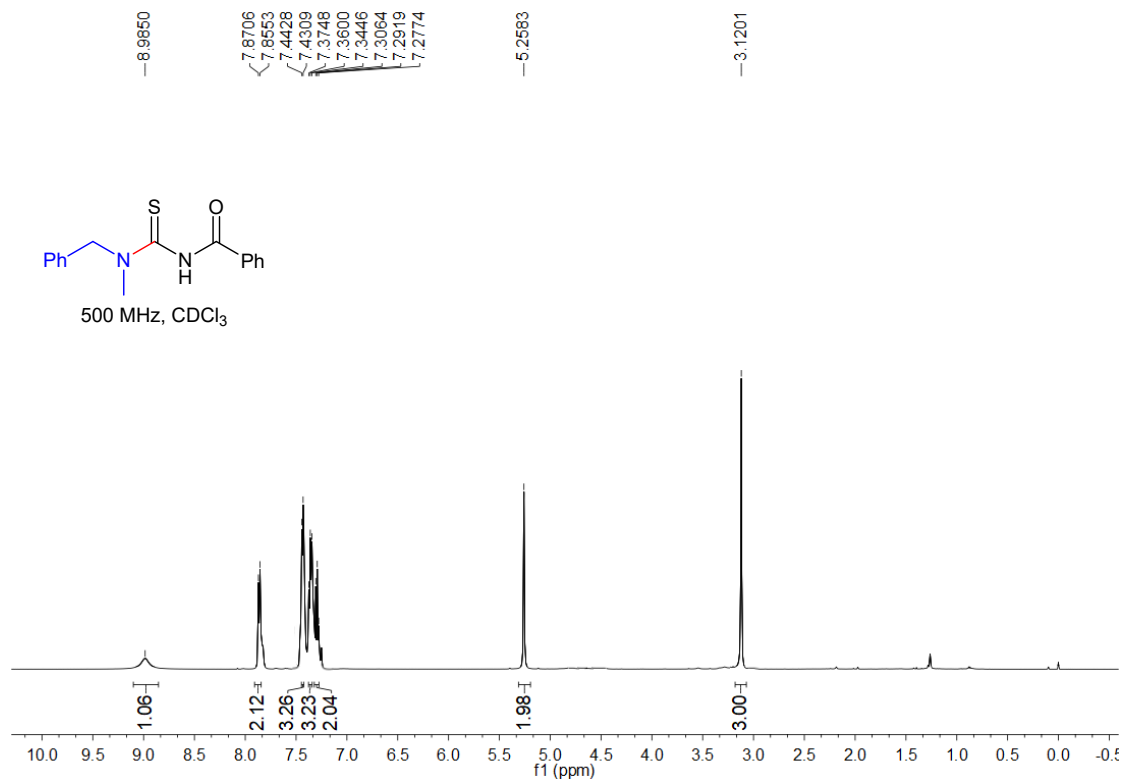<sup>13</sup>C NMR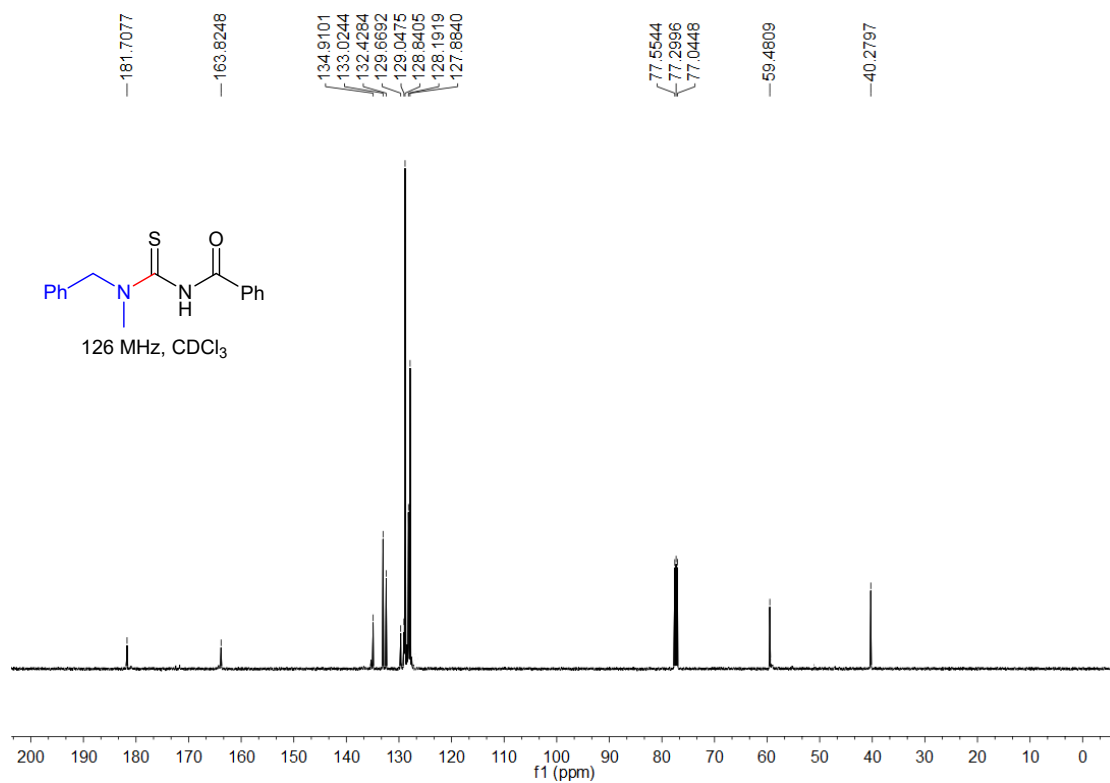

26c

<sup>1</sup>H NMR

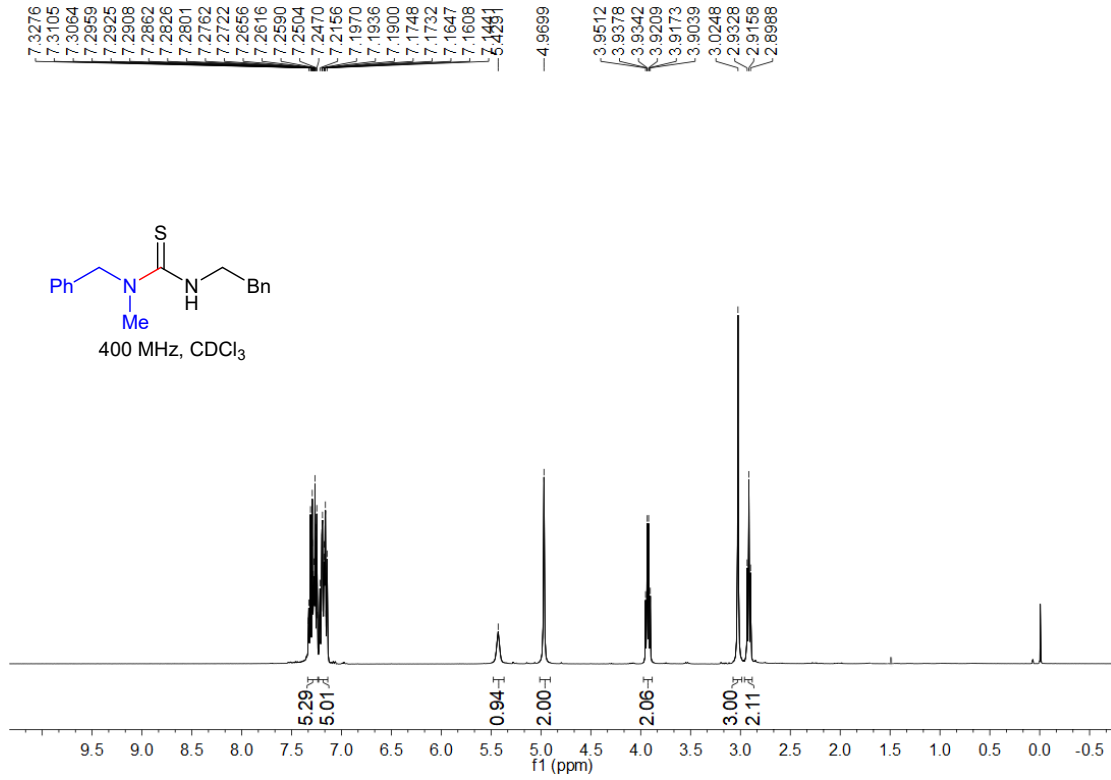

<sup>13</sup>C NMR

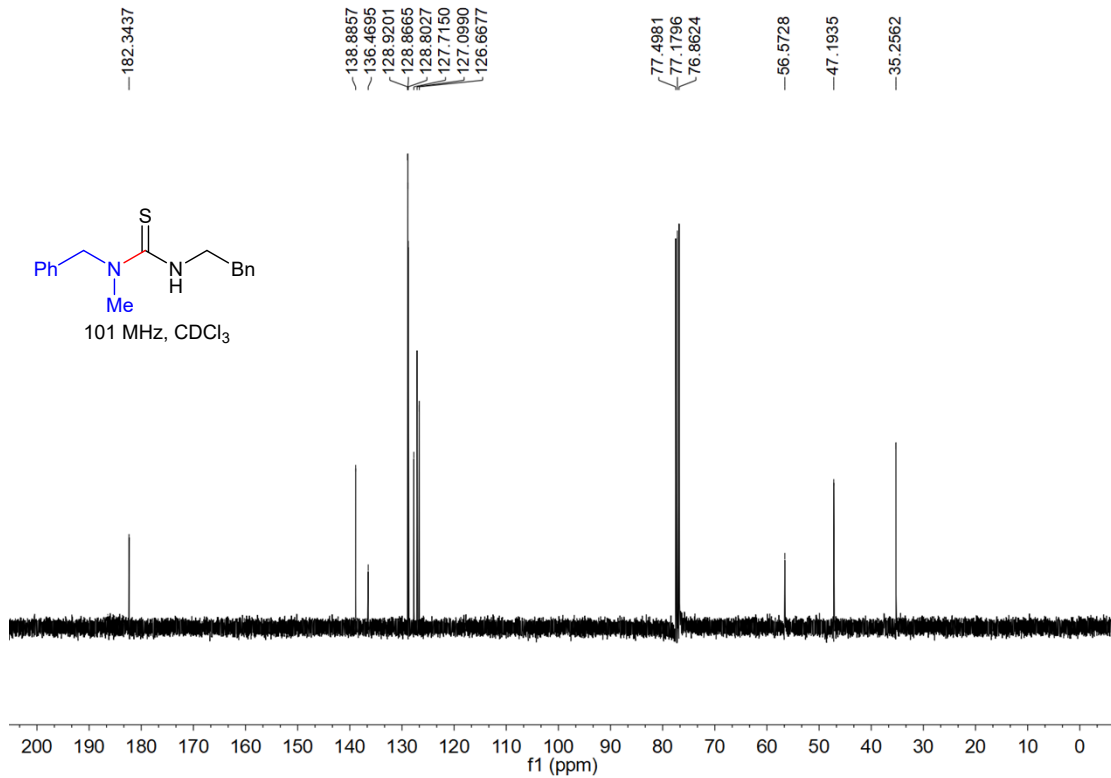

27c

<sup>1</sup>H NMR

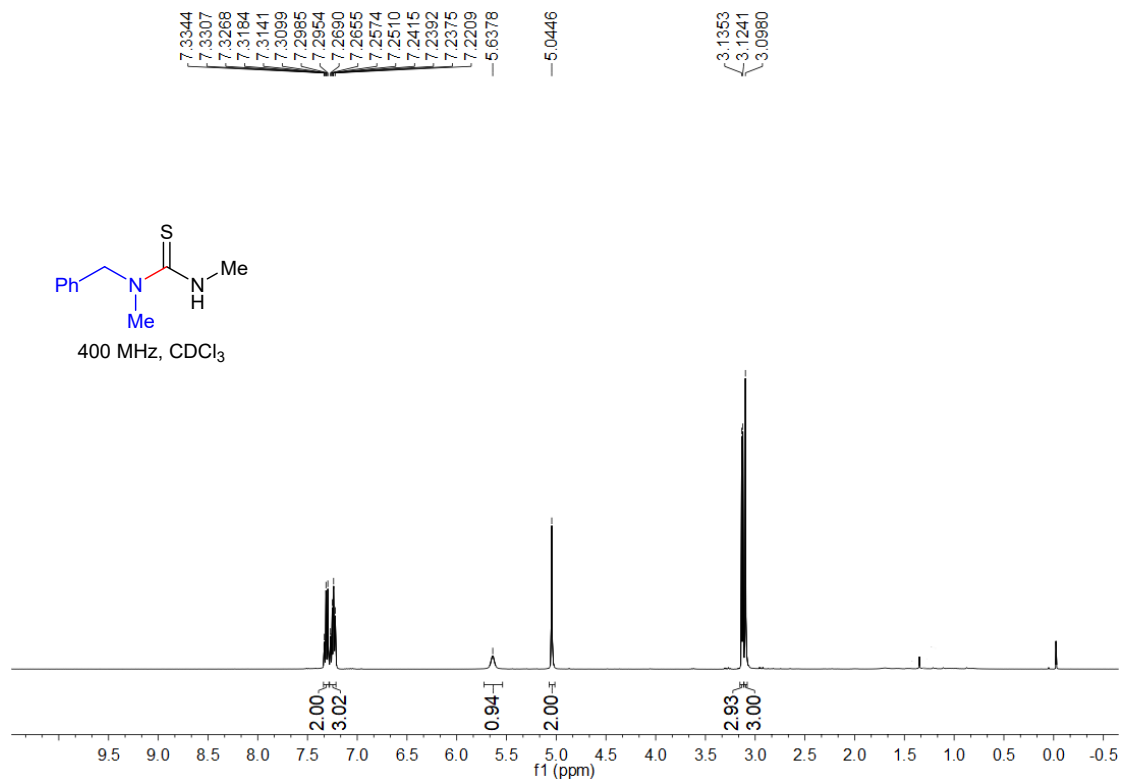

<sup>13</sup>C NMR

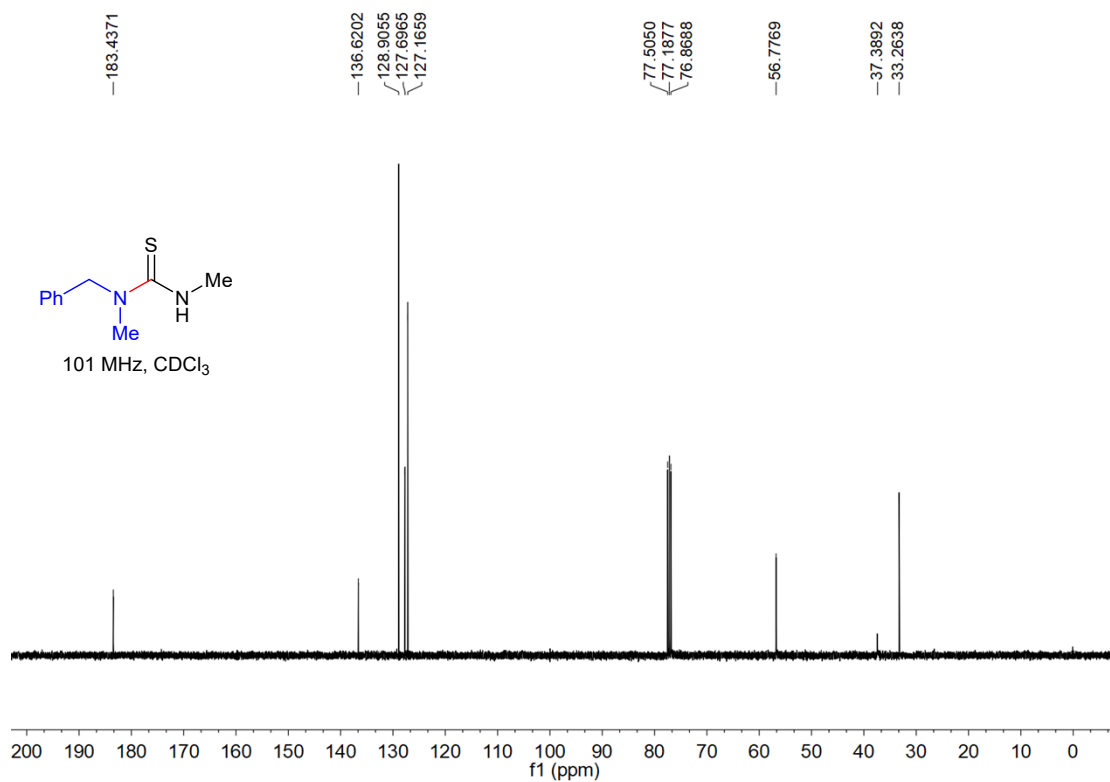

## 28c

<sup>1</sup>H NMR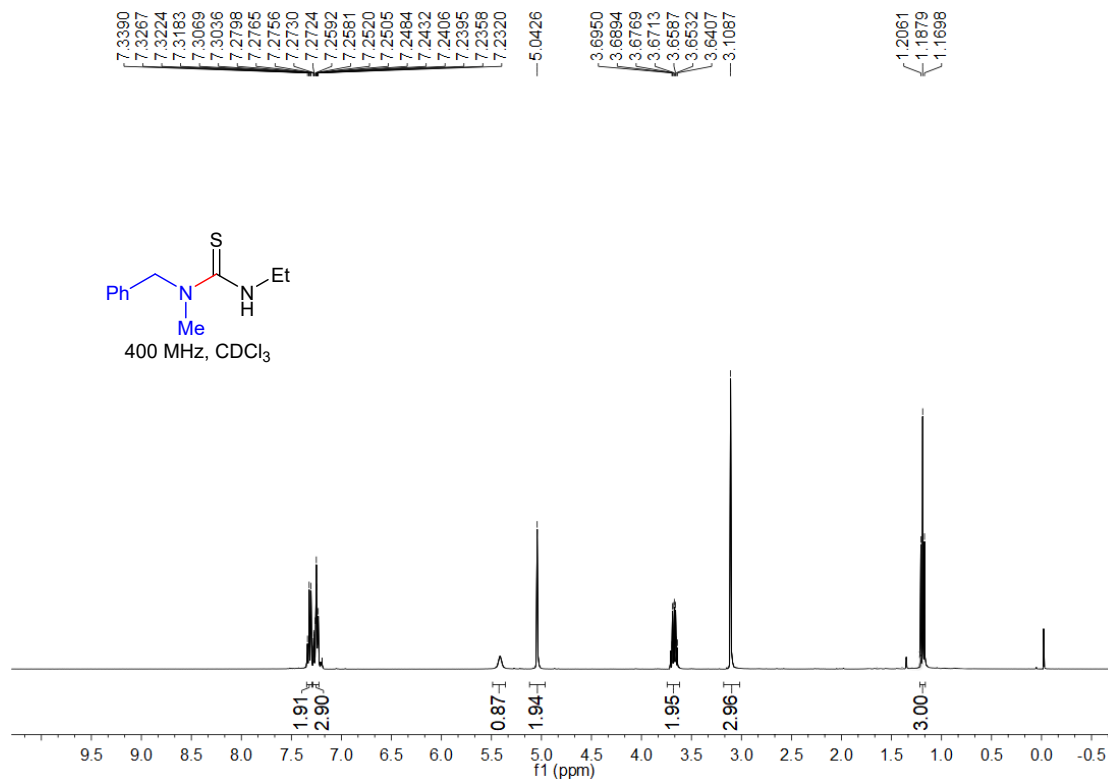<sup>13</sup>C NMR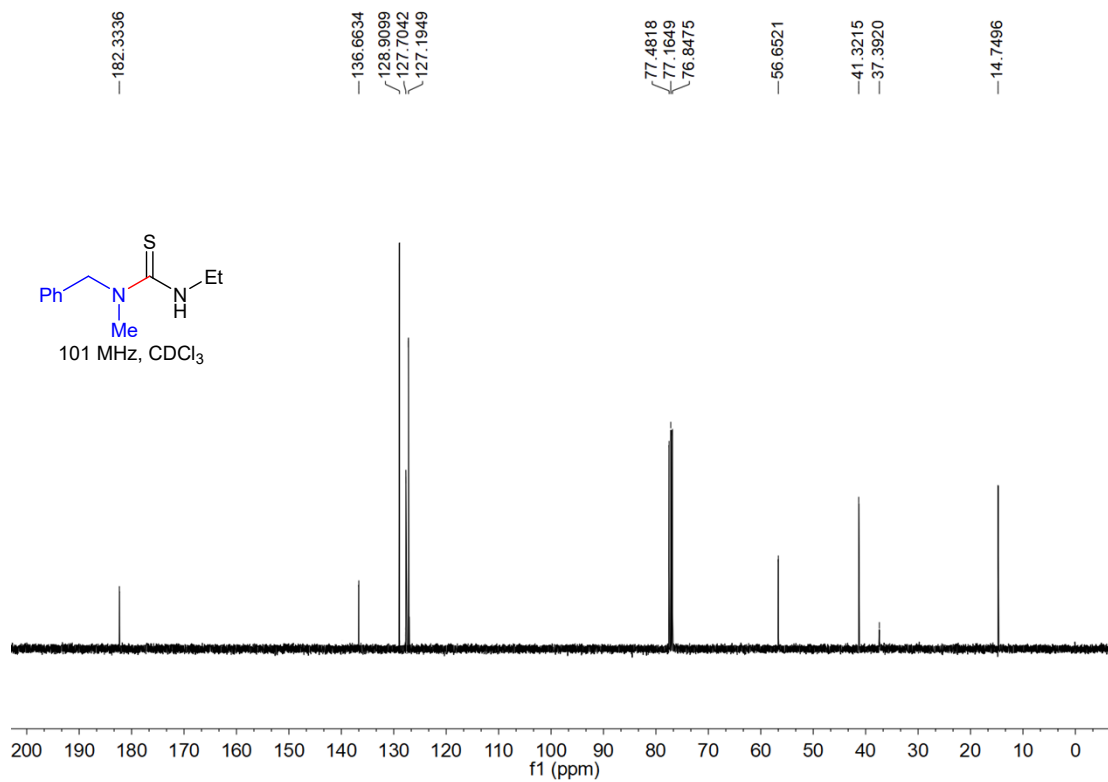

29c

<sup>1</sup>H NMR

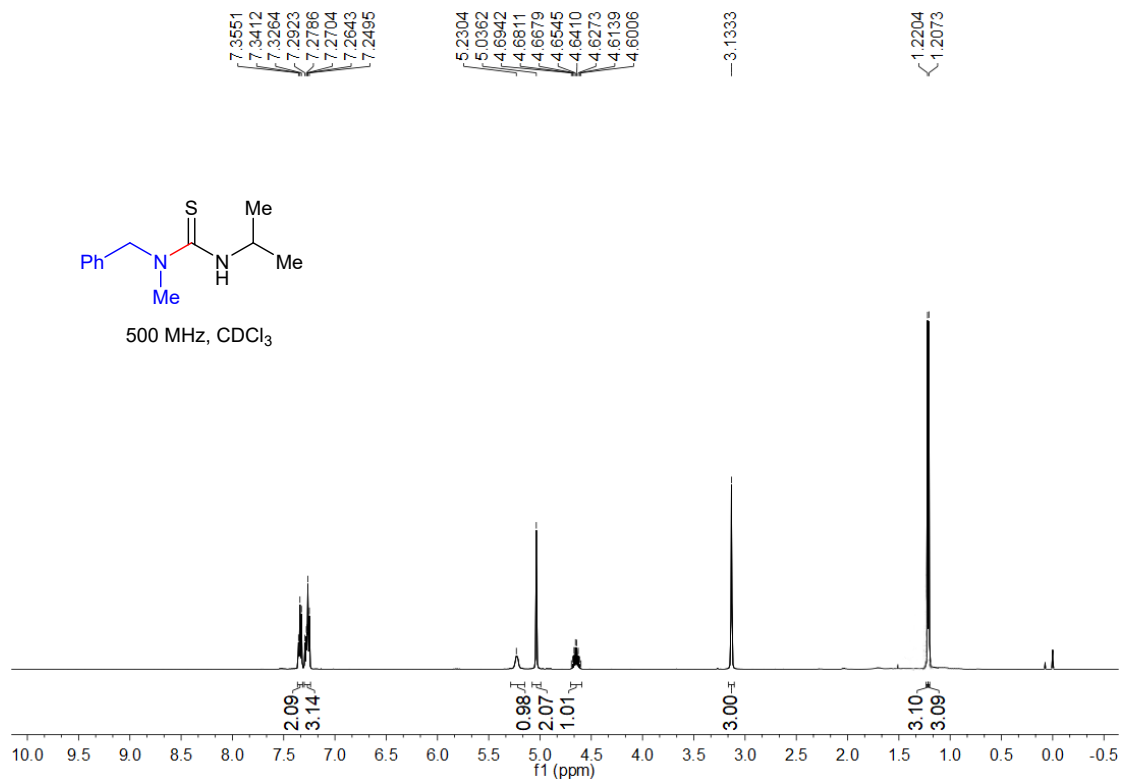

<sup>13</sup>C NMR

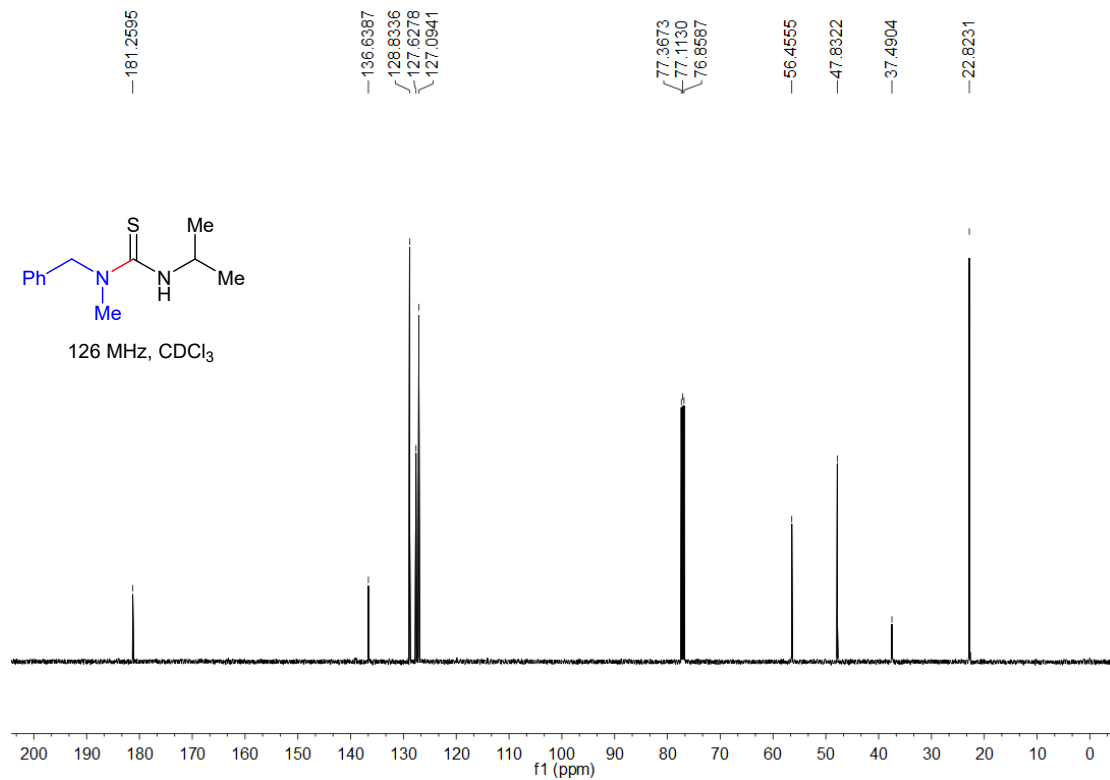

## 30c

 $^1\text{H NMR}$ 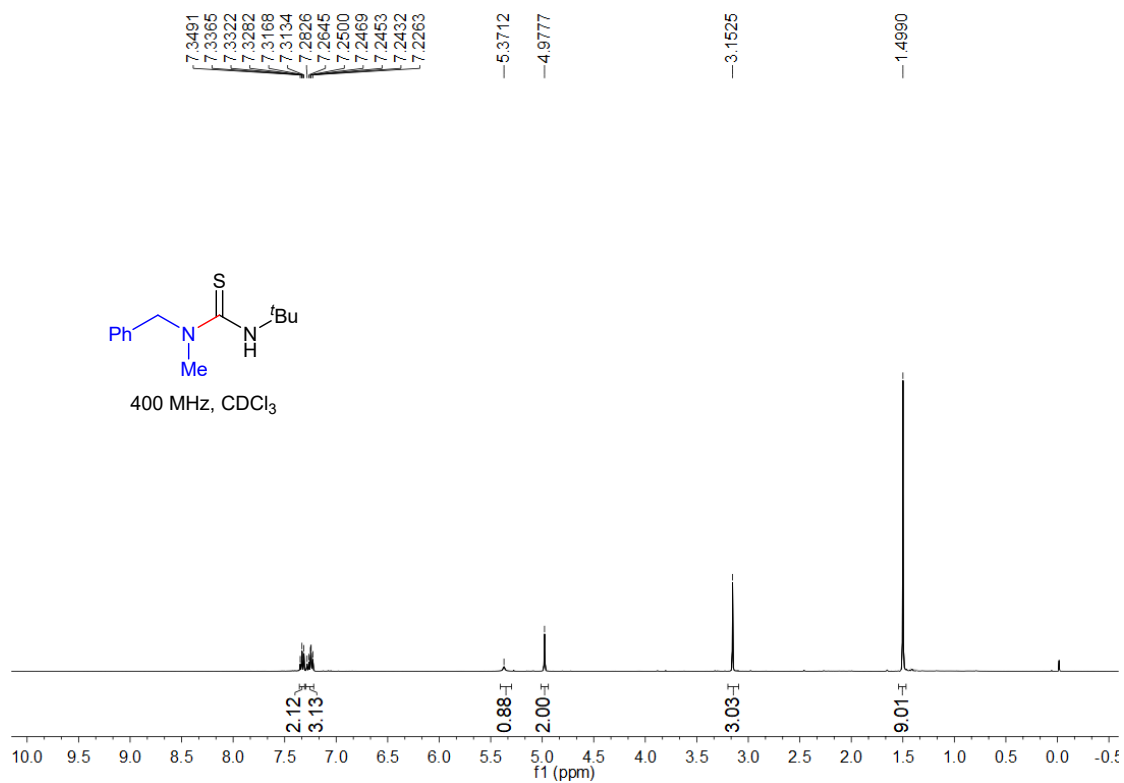 $^{13}\text{C NMR}$ 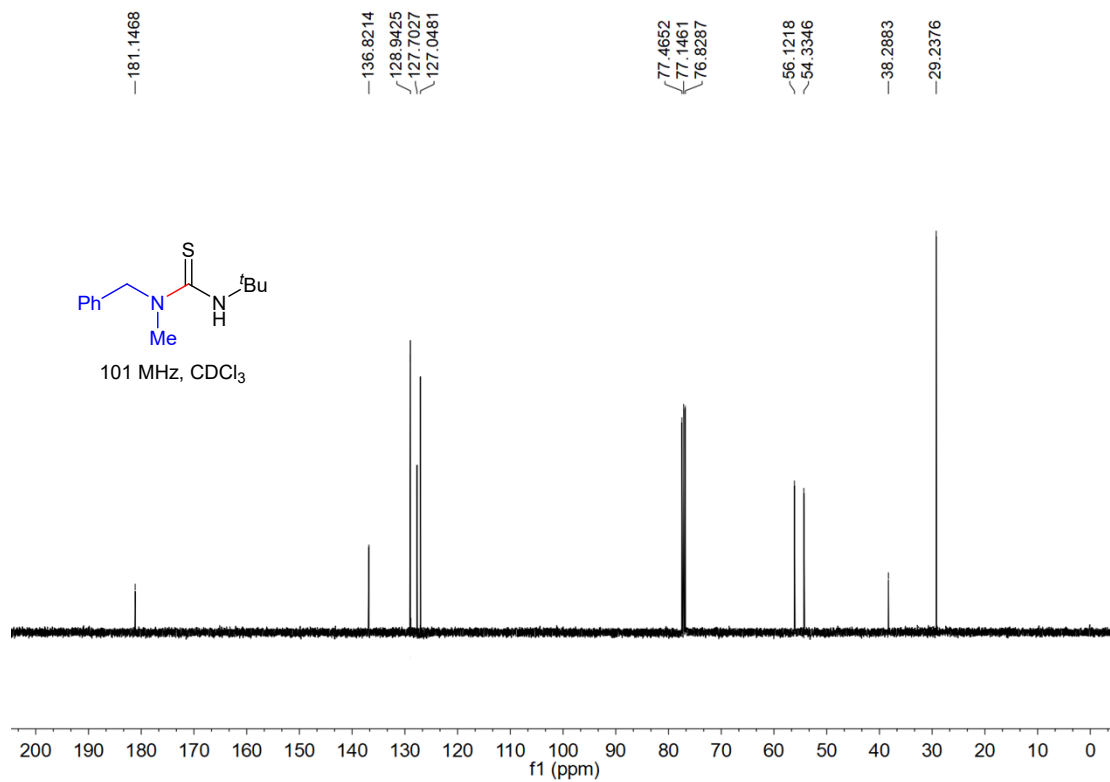

### 31c

#### <sup>1</sup>H NMR

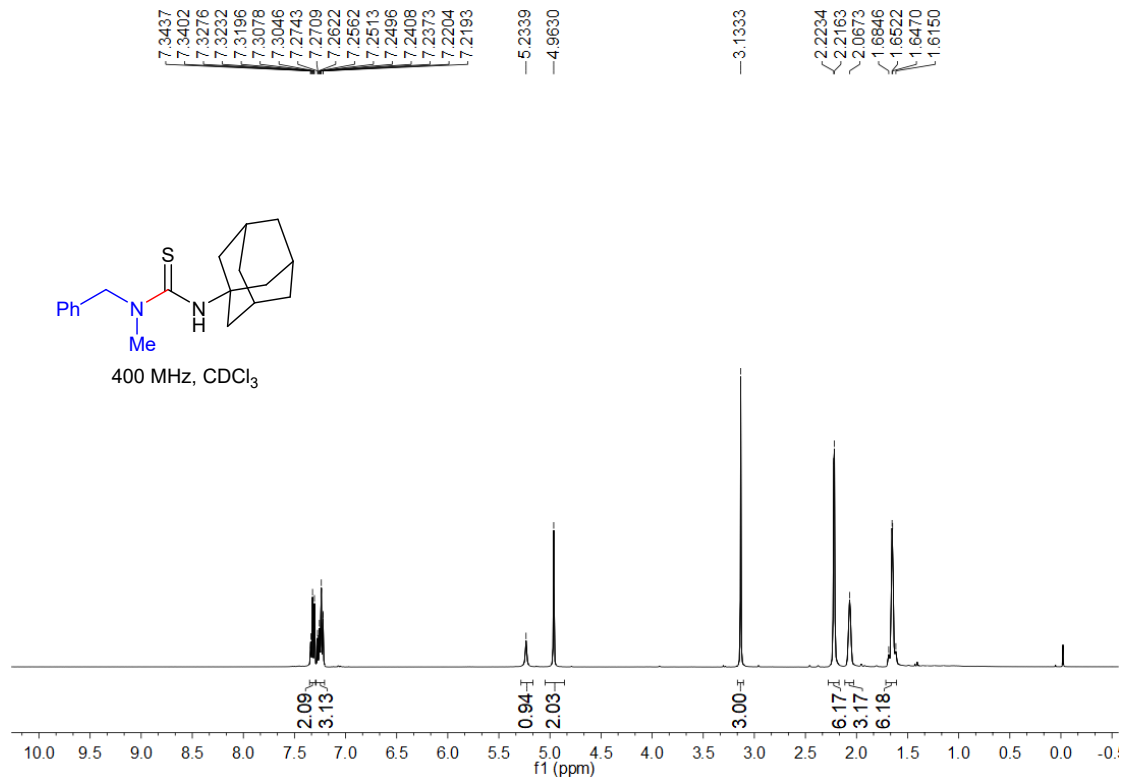

#### <sup>13</sup>C NMR

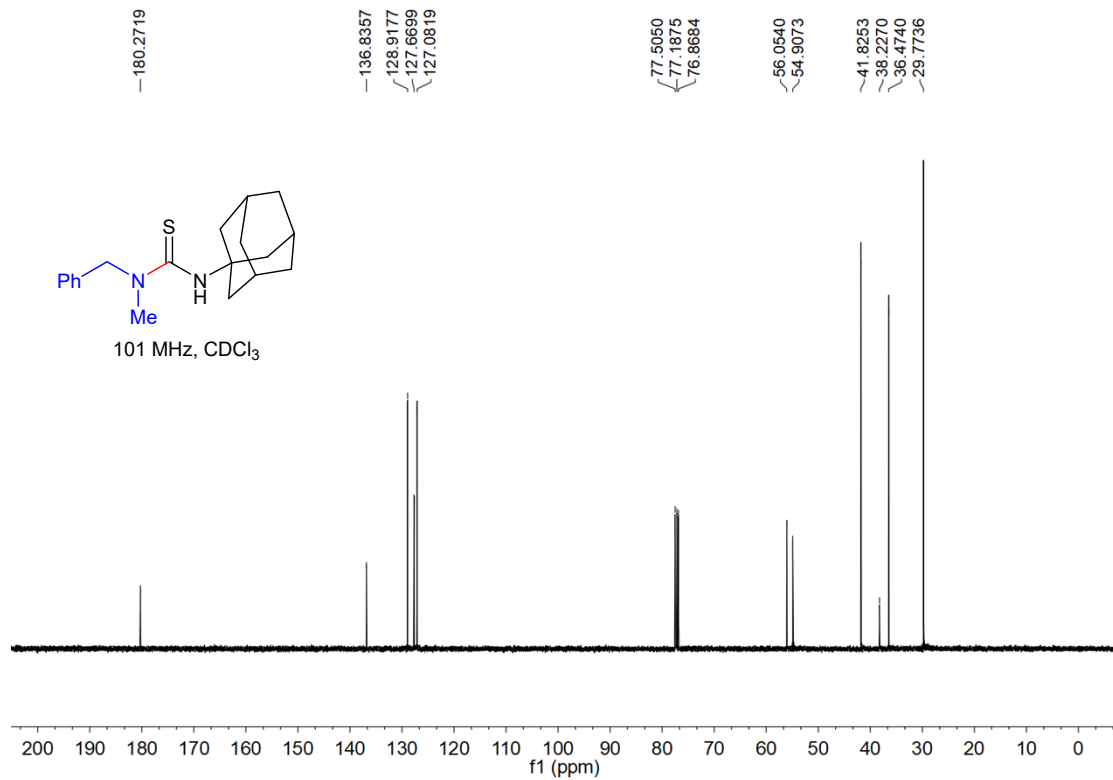

## 32c

<sup>1</sup>H NMR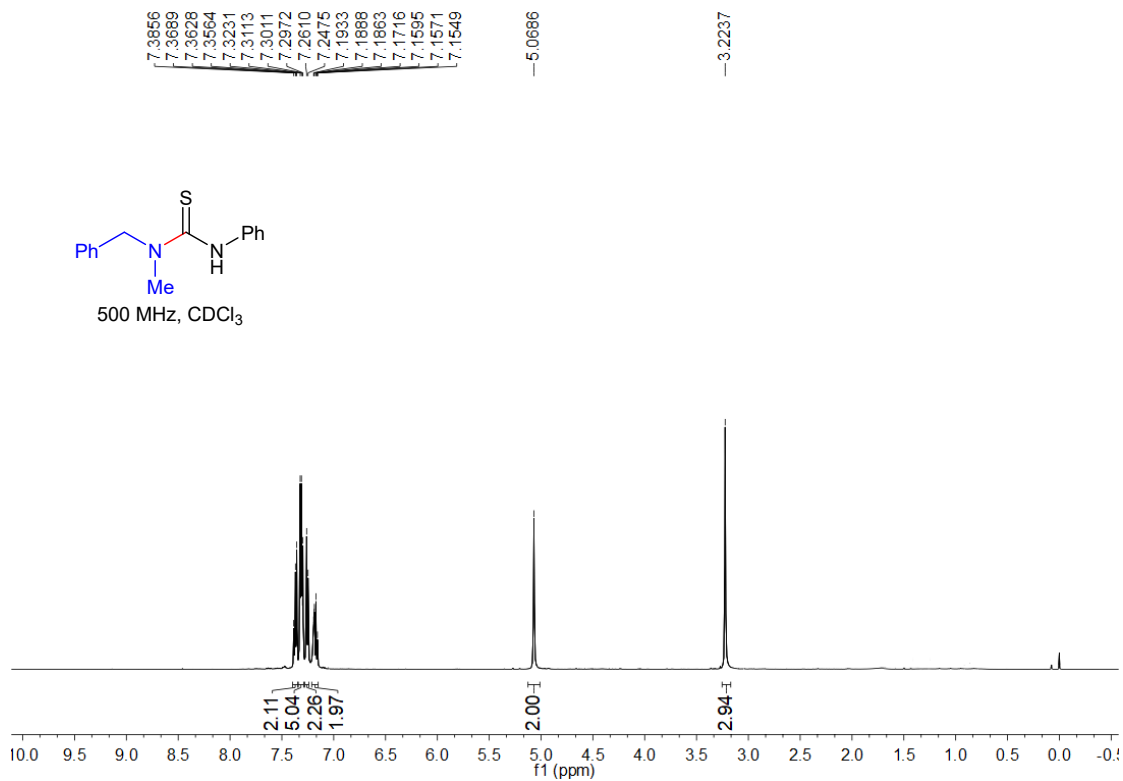<sup>13</sup>C NMR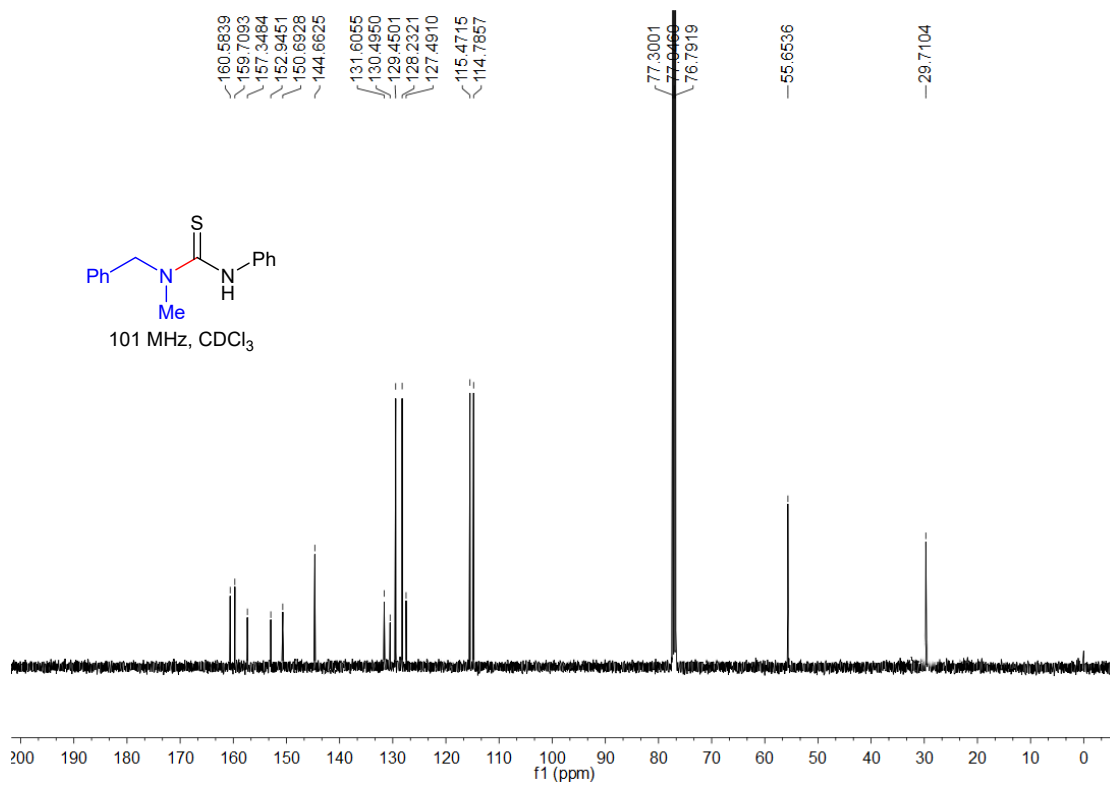



## 33c

<sup>1</sup>H NMR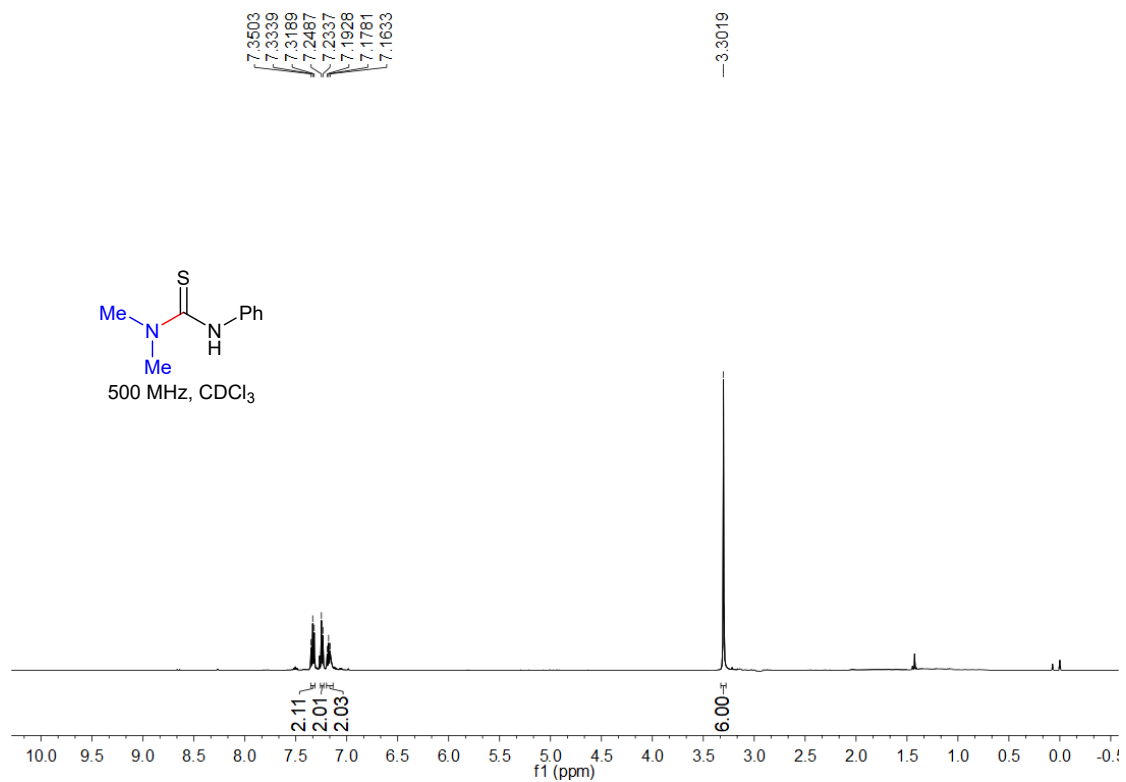<sup>13</sup>C NMR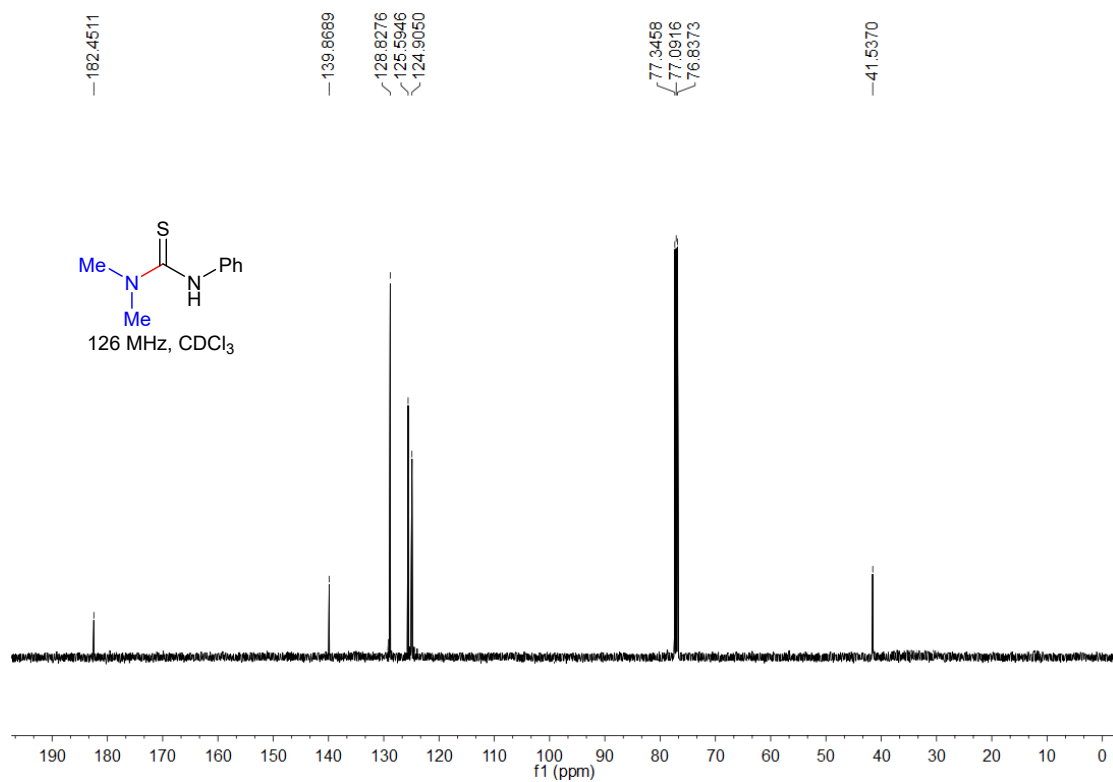

## 34c

<sup>1</sup>H NMR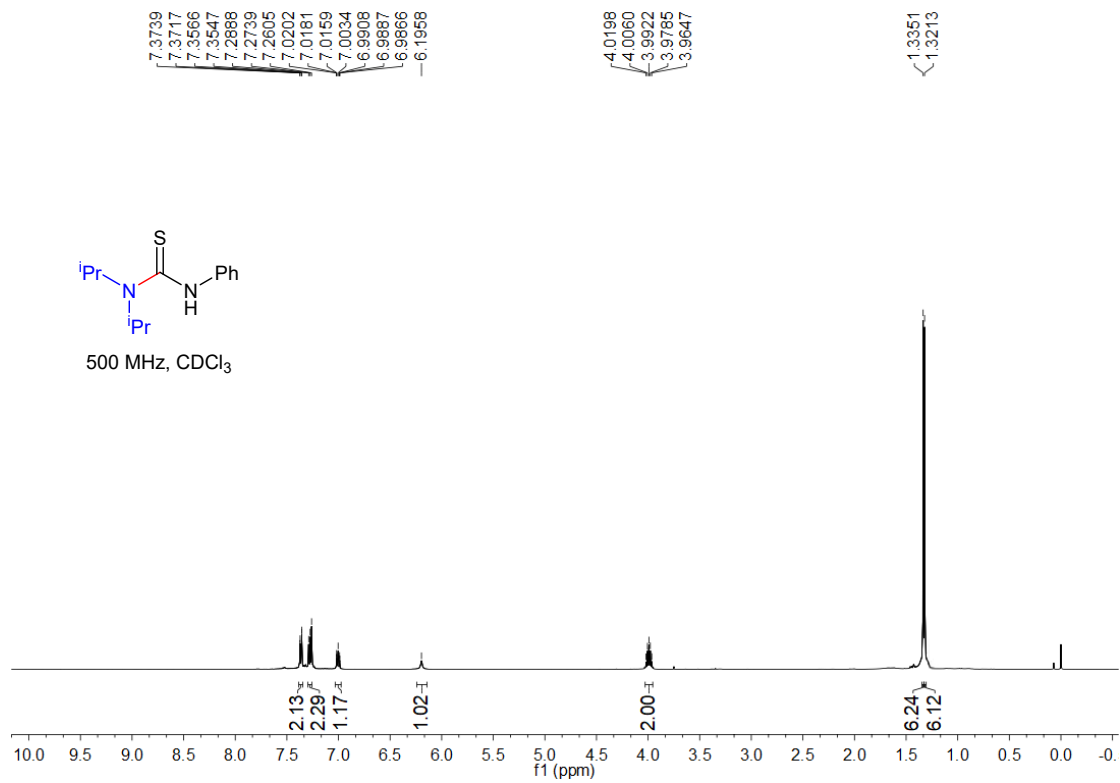<sup>13</sup>C NMR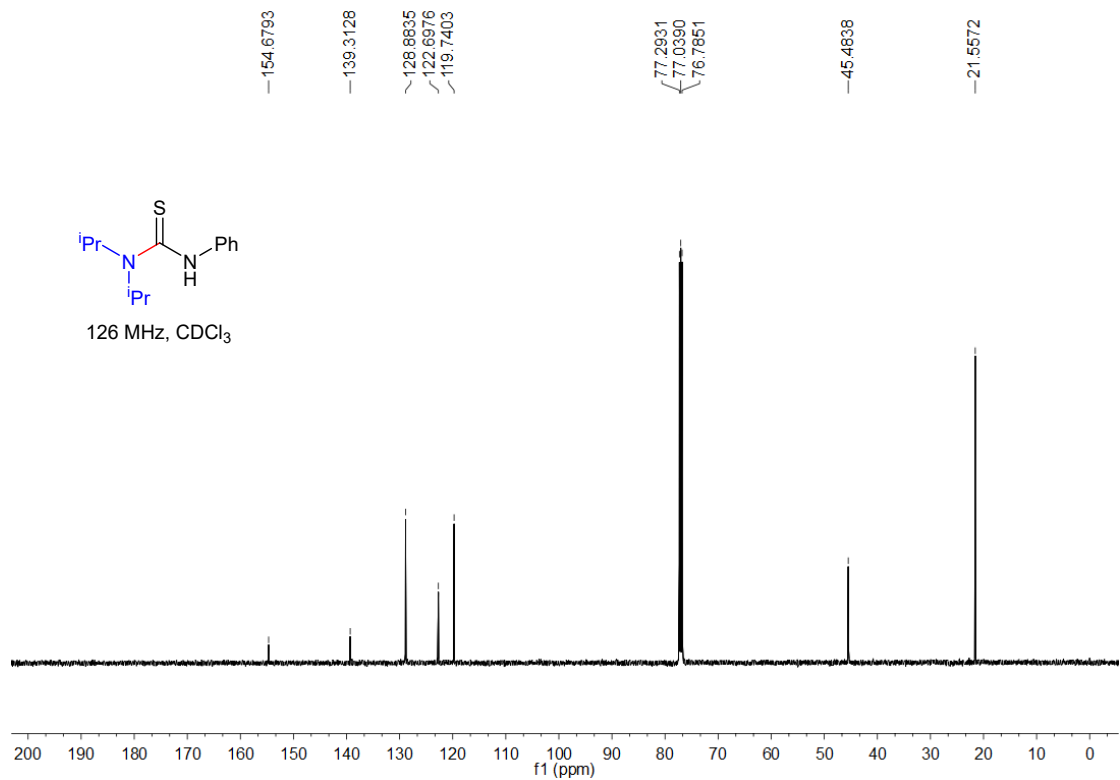

## 35c

<sup>1</sup>H NMR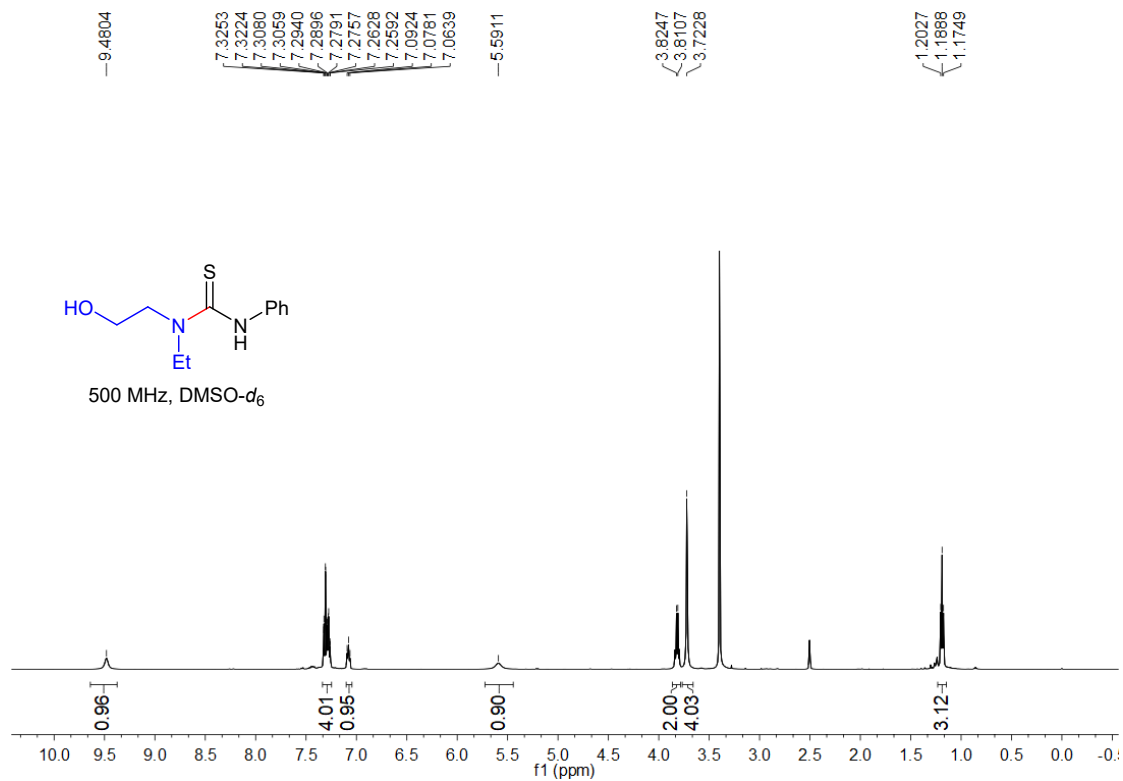<sup>13</sup>C NMR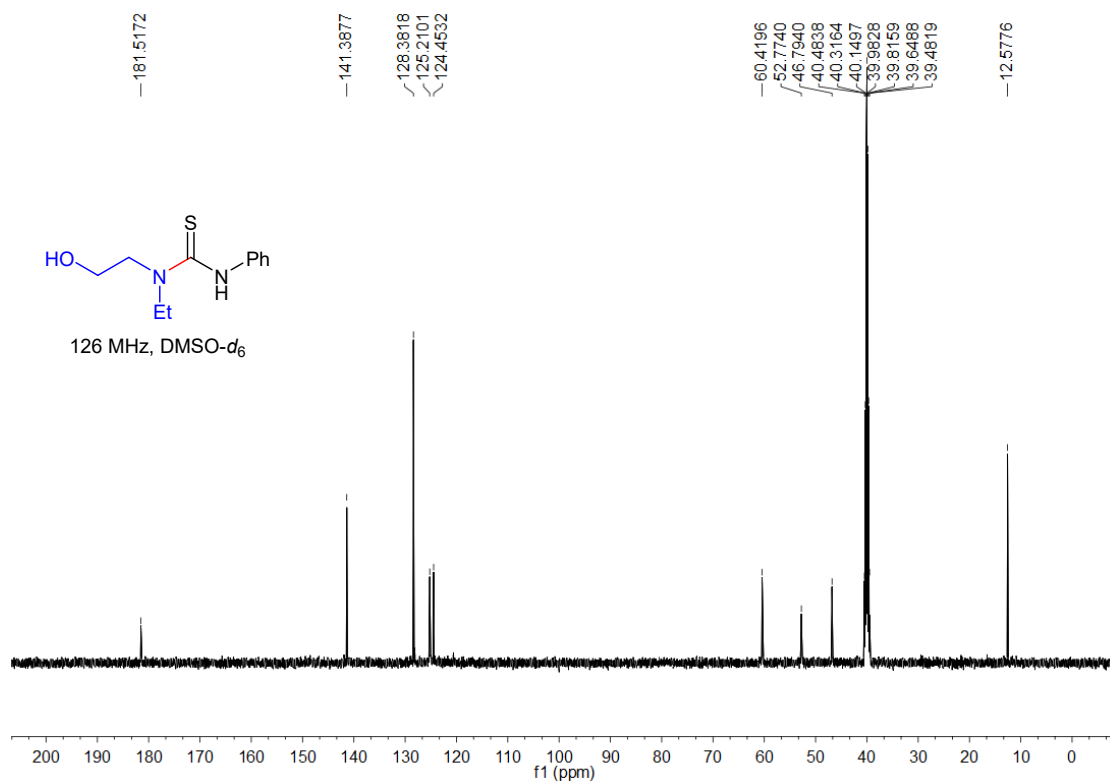

## 36c

<sup>1</sup>H NMR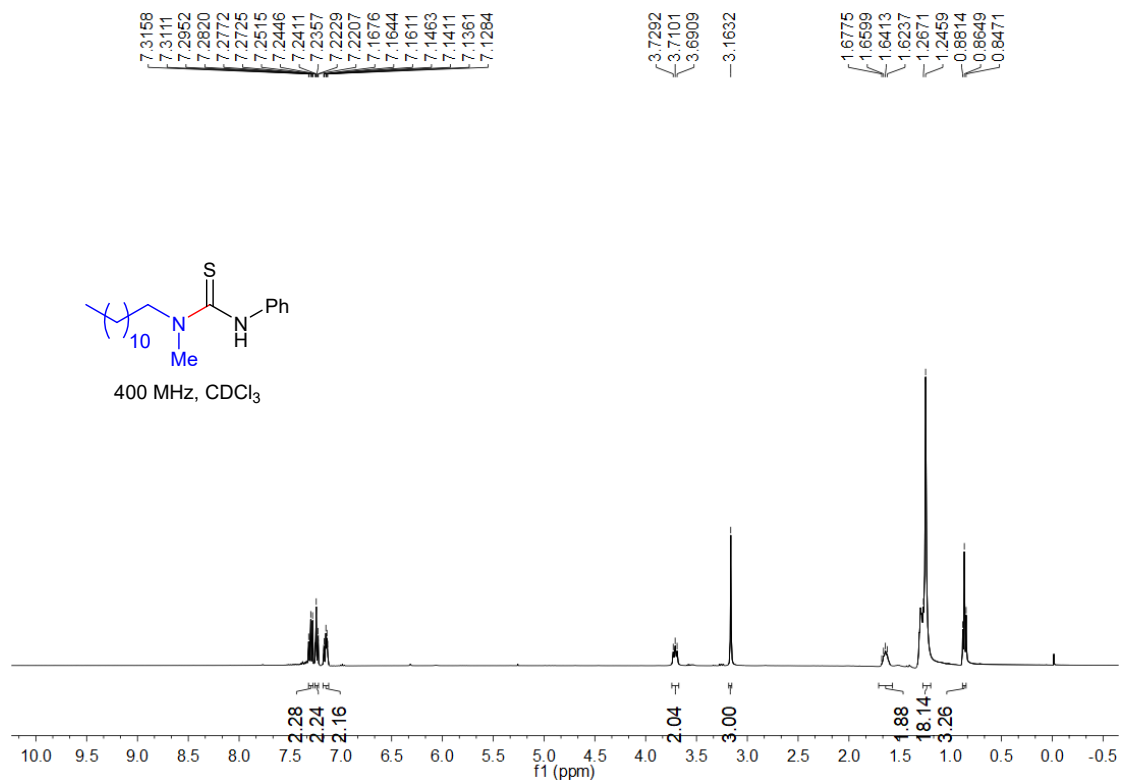<sup>13</sup>C NMR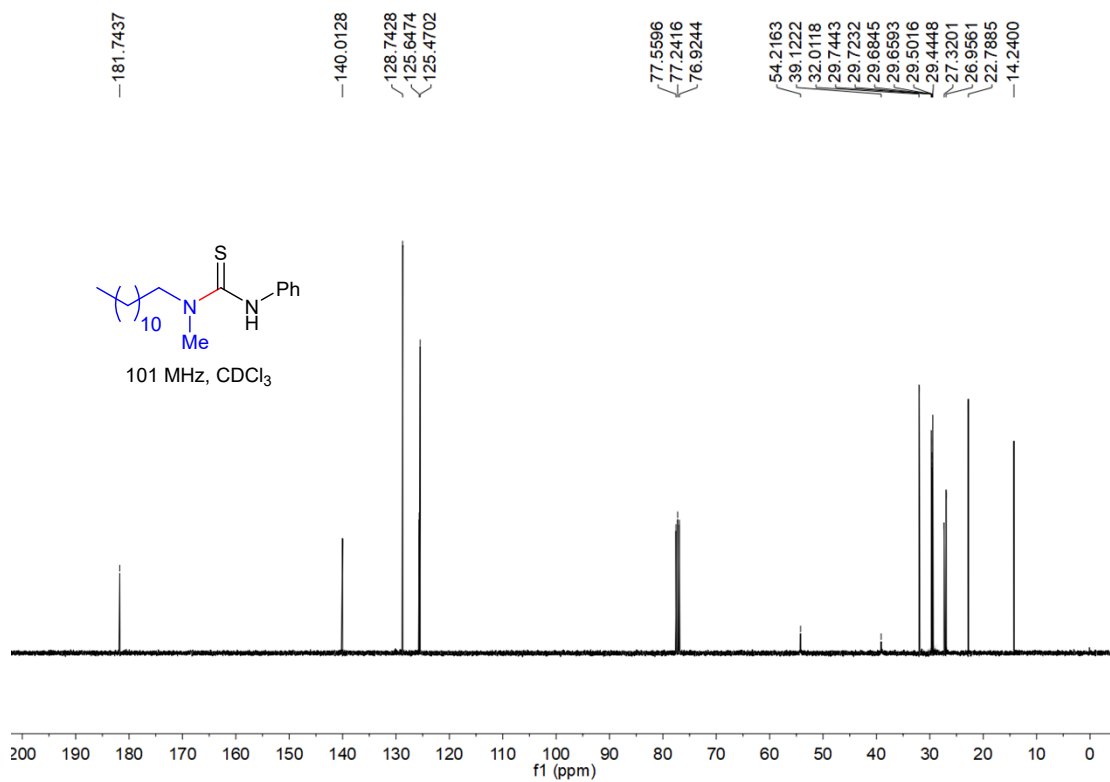

37c

<sup>1</sup>H NMR

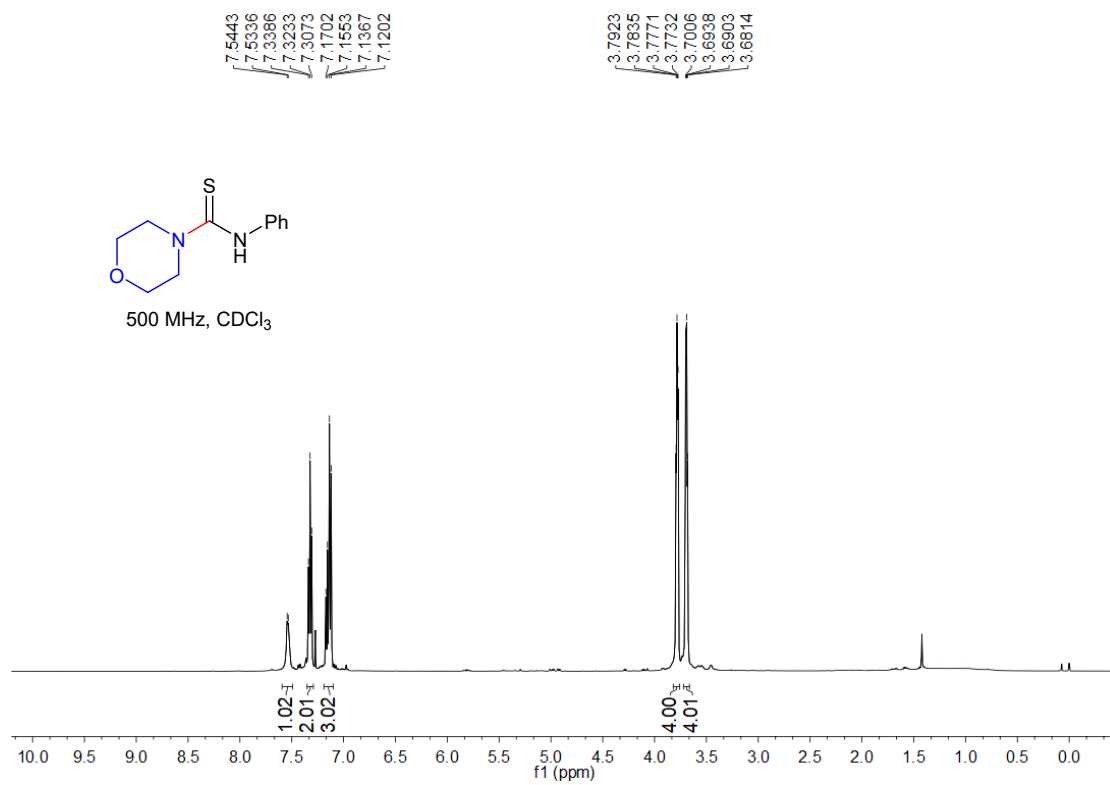

<sup>13</sup>C NMR

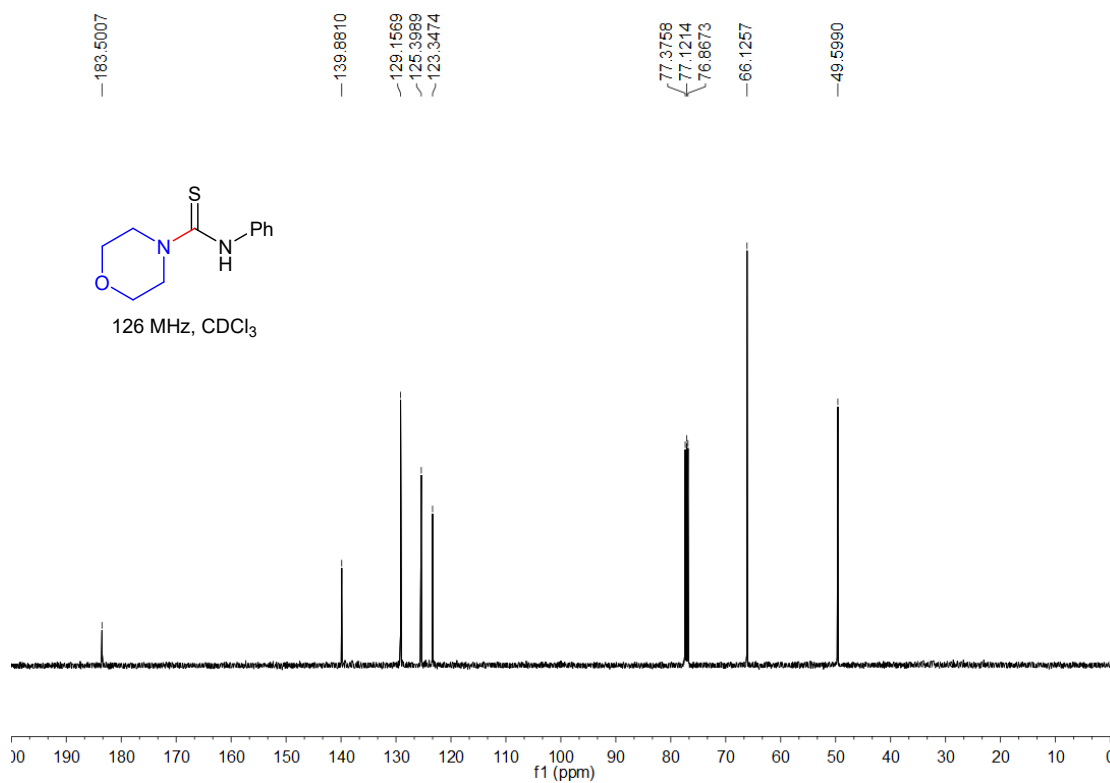

## 38c

<sup>1</sup>H NMR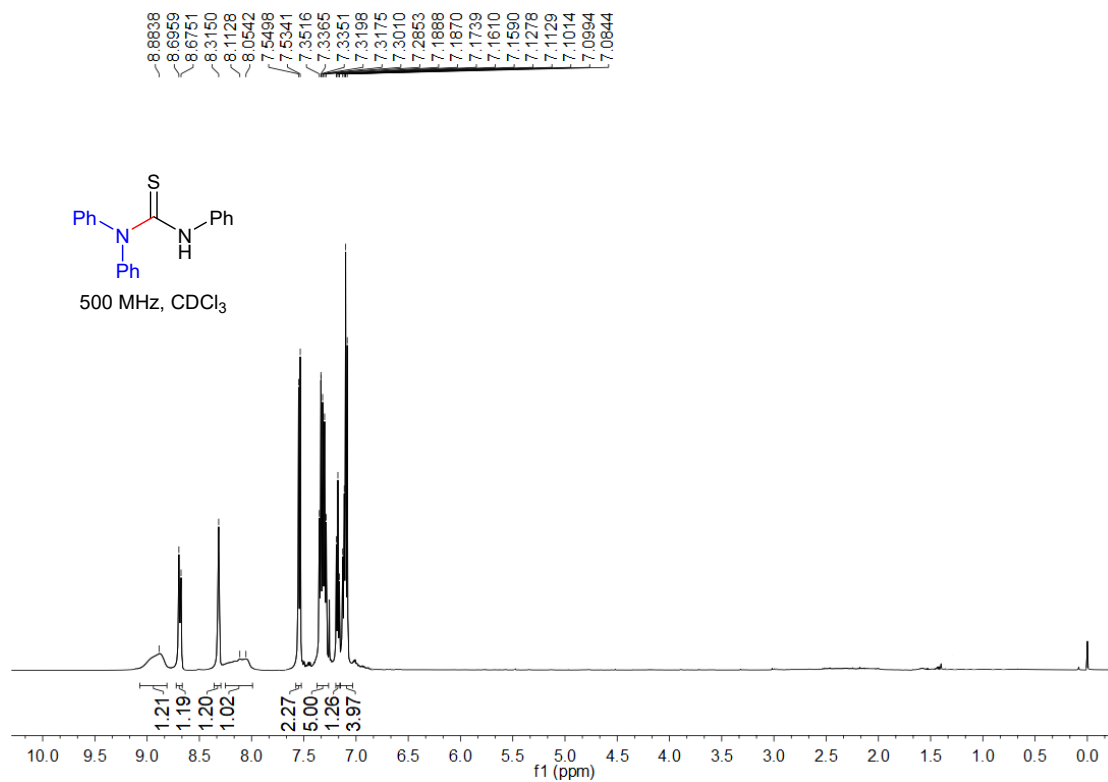<sup>13</sup>C NMR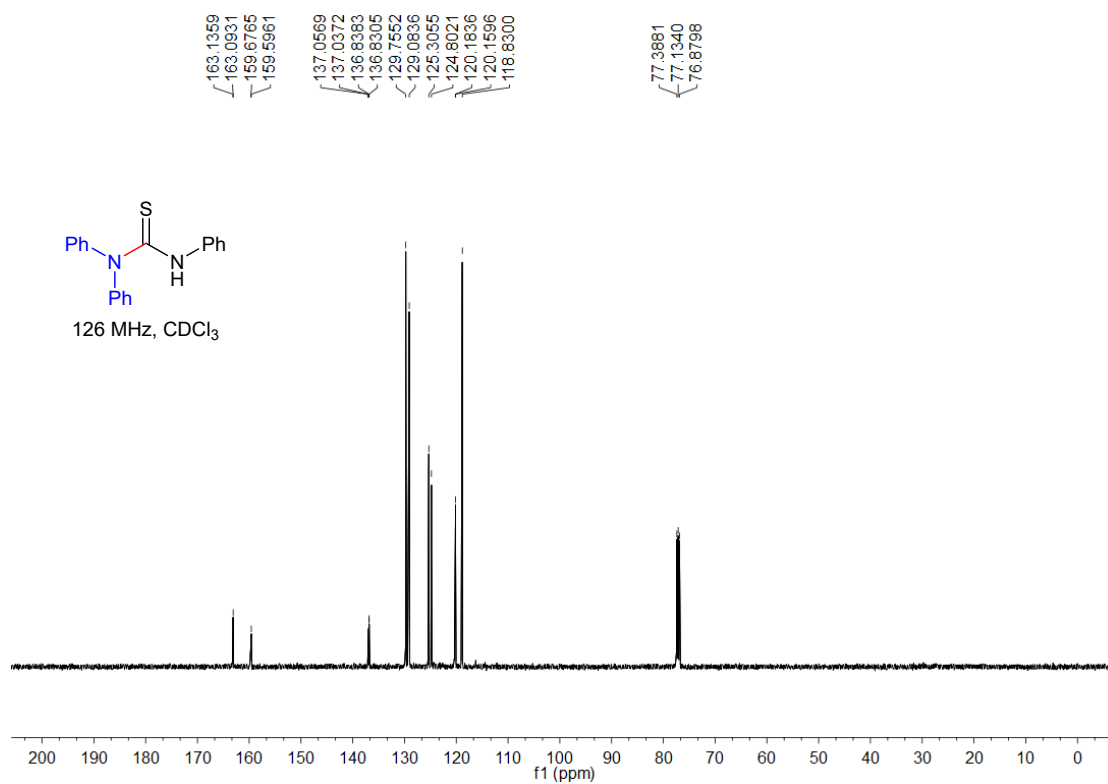

1e

<sup>1</sup>H NMR

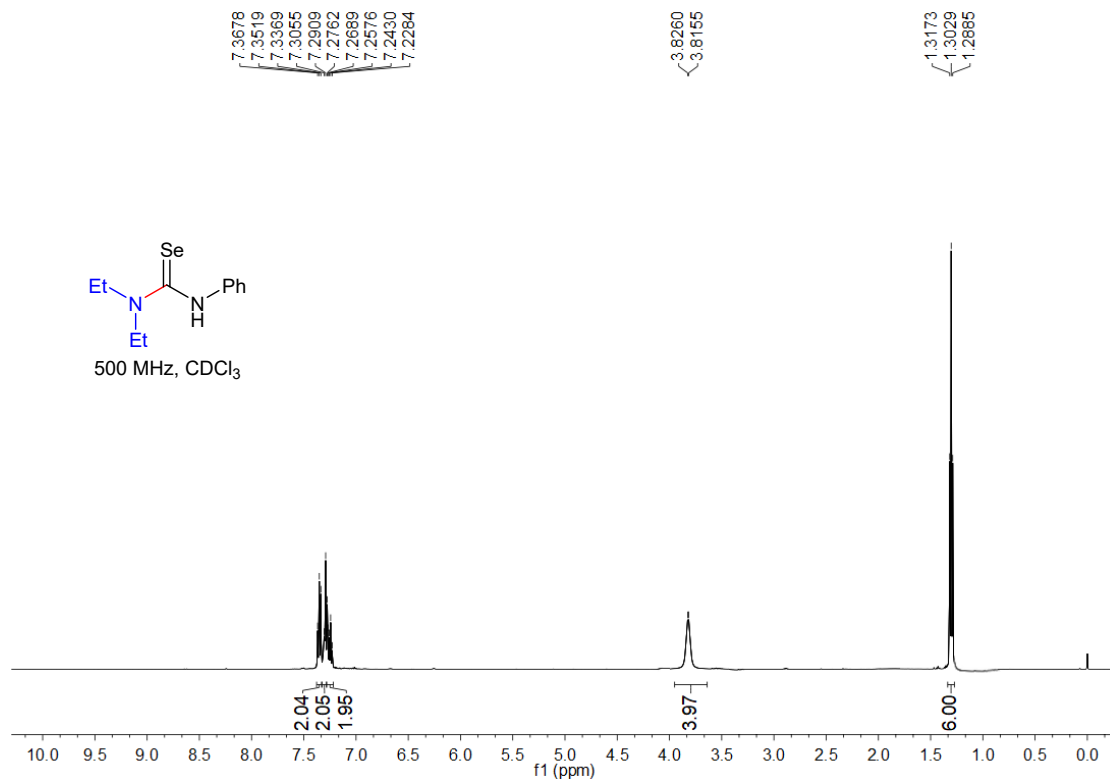

<sup>13</sup>C NMR

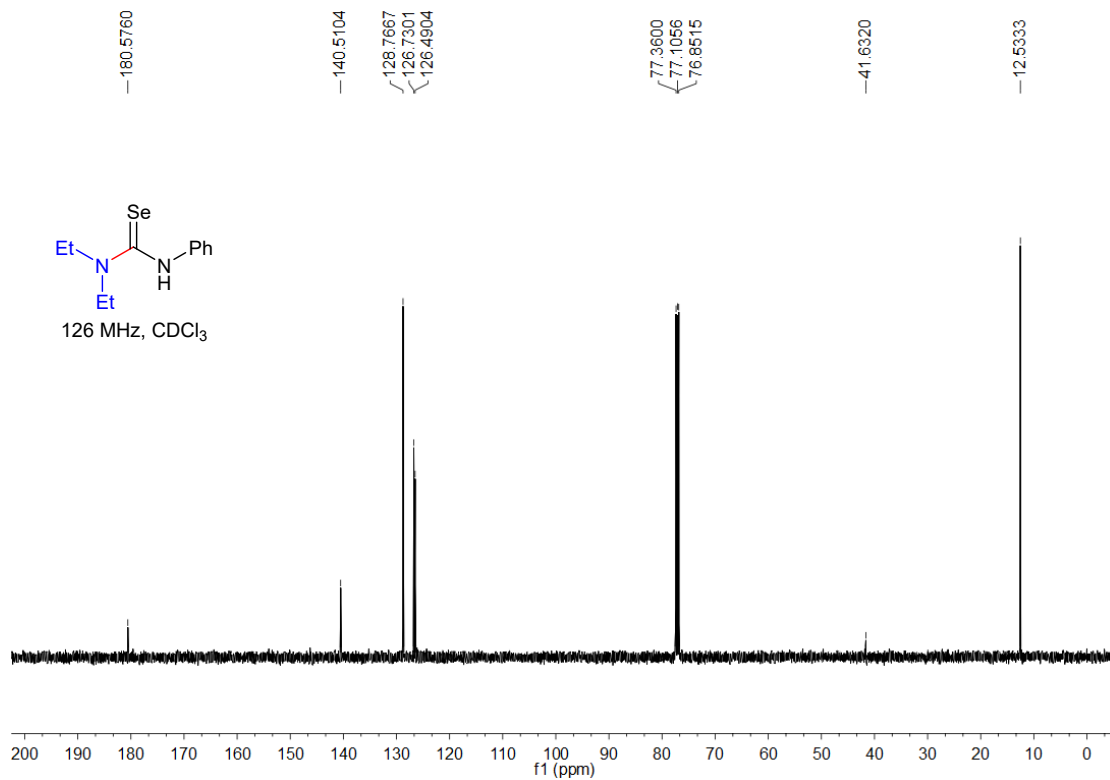

2e

<sup>1</sup>H NMR

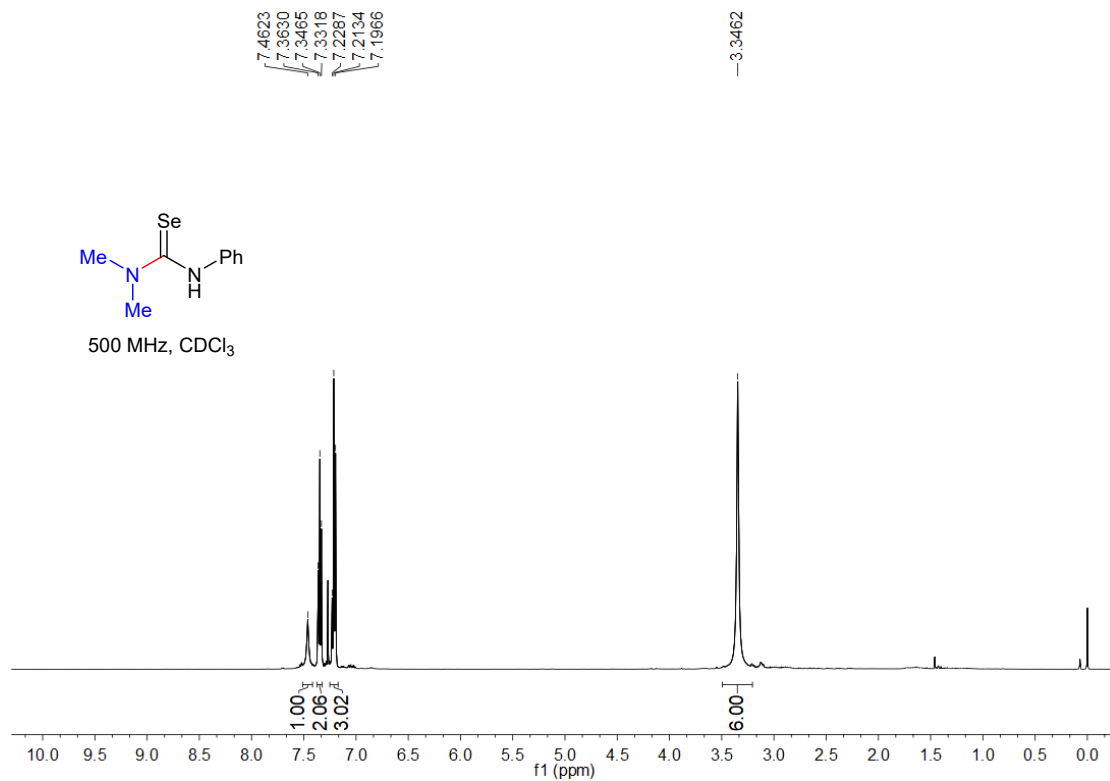

<sup>13</sup>C NMR

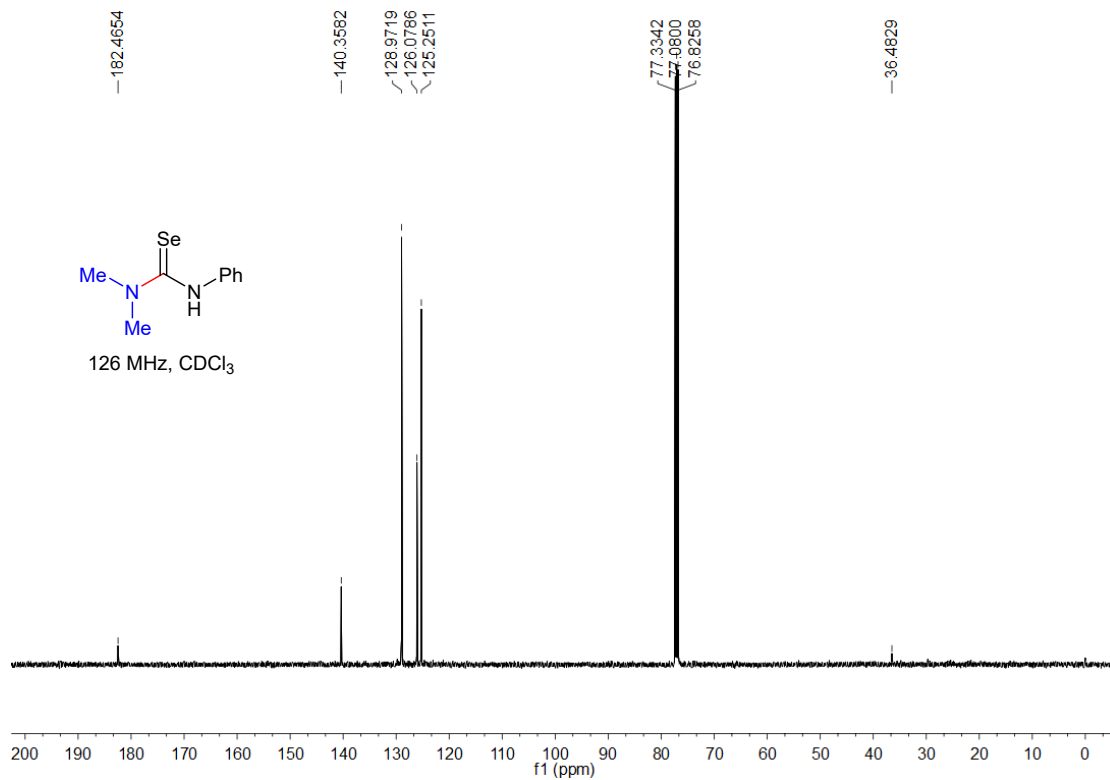



3e

<sup>1</sup>H NMR

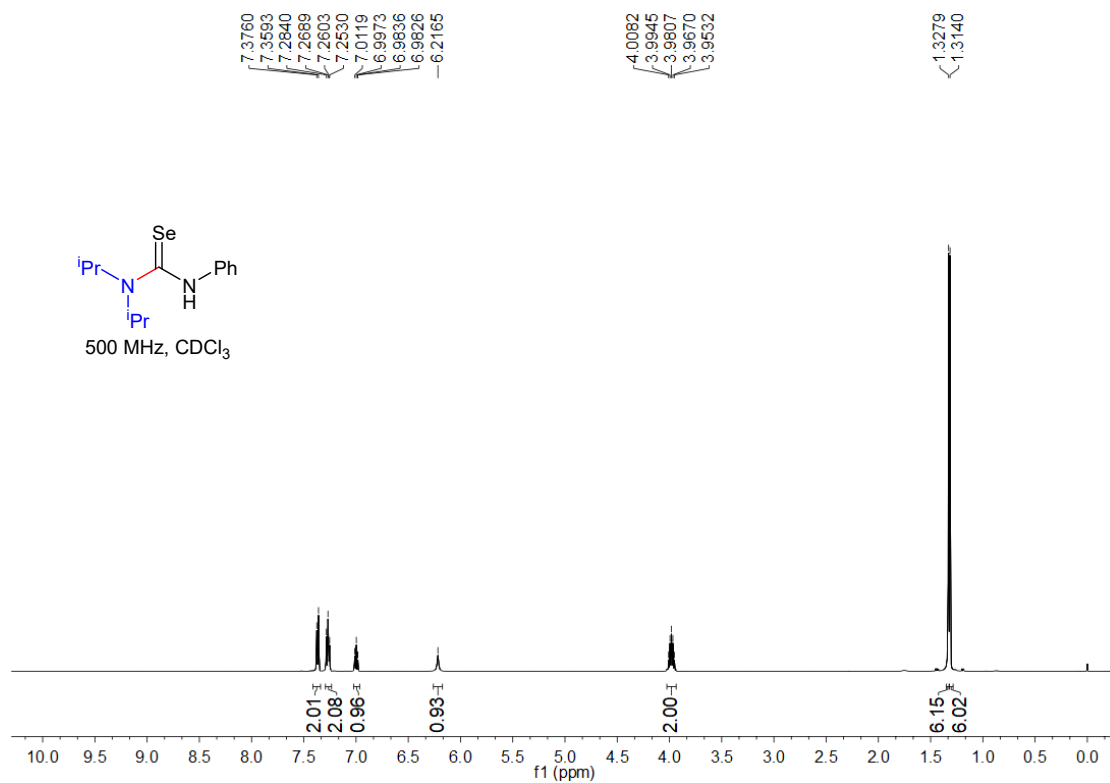

<sup>13</sup>C NMR

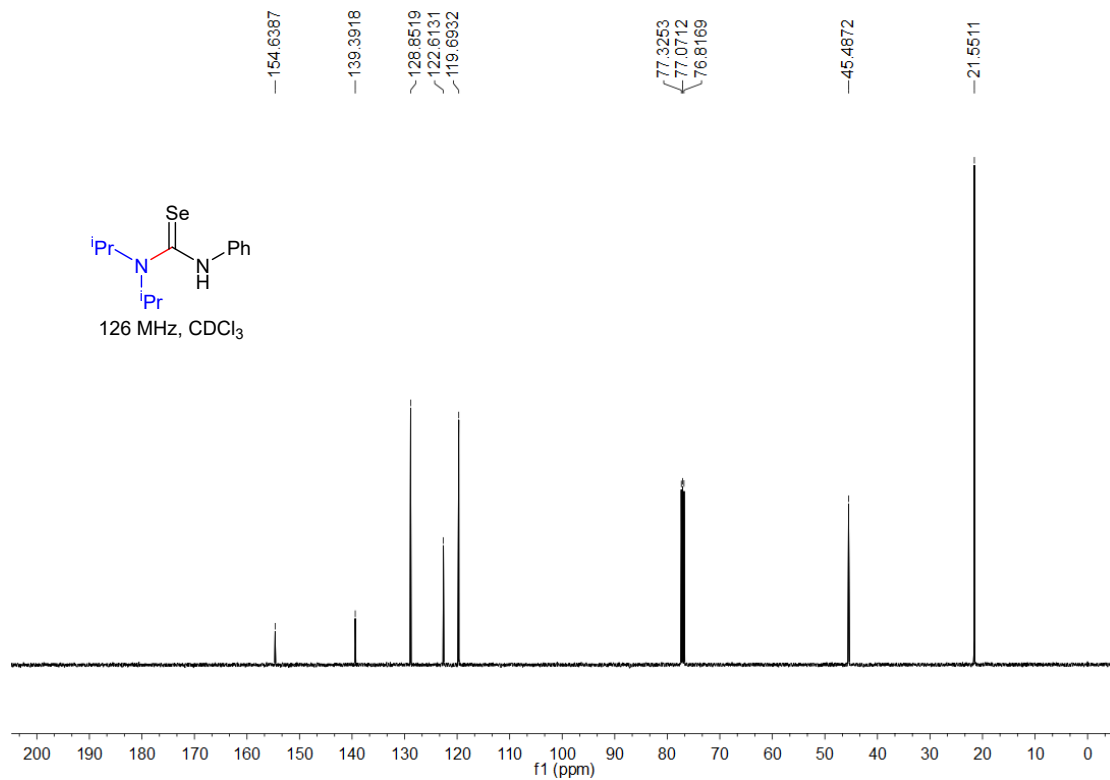

4e

<sup>1</sup>H NMR

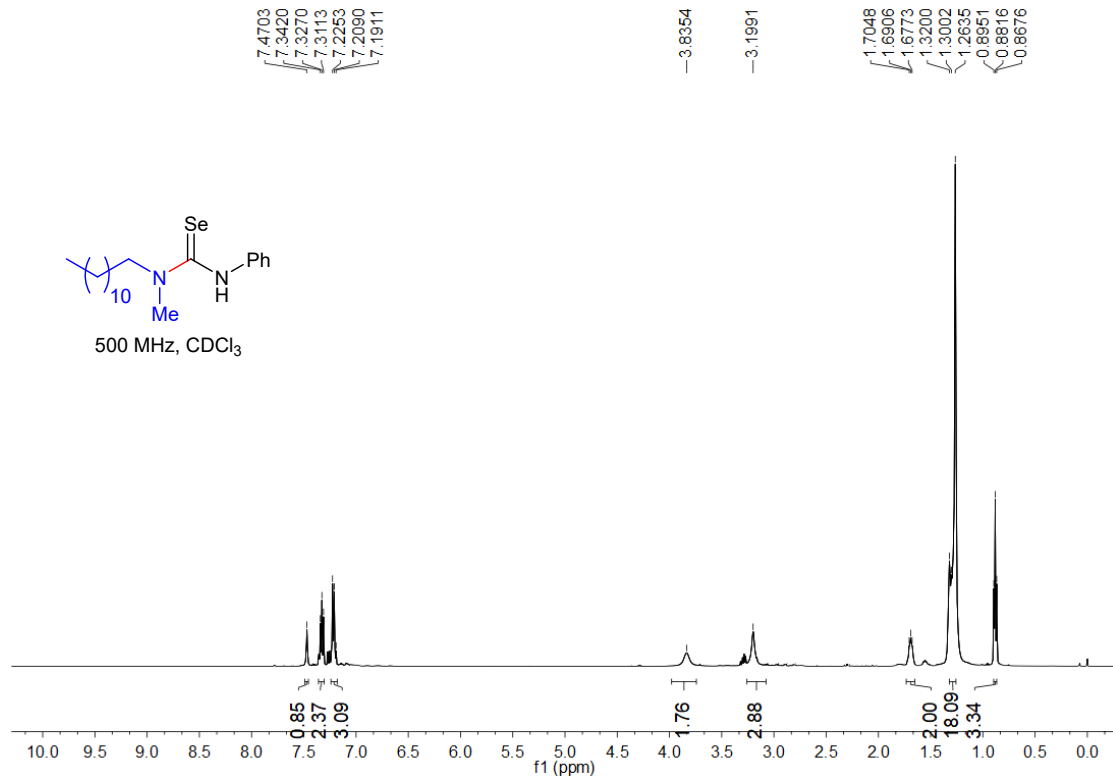

<sup>13</sup>C NMR

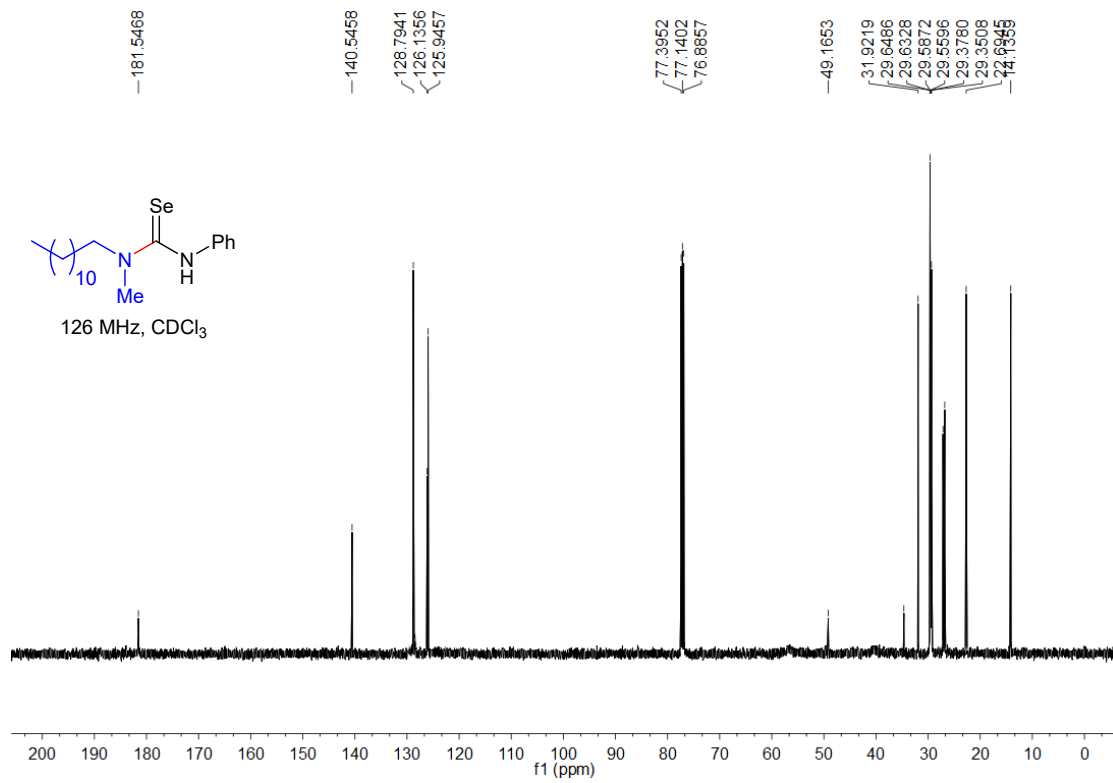

5e

<sup>1</sup>H NMR

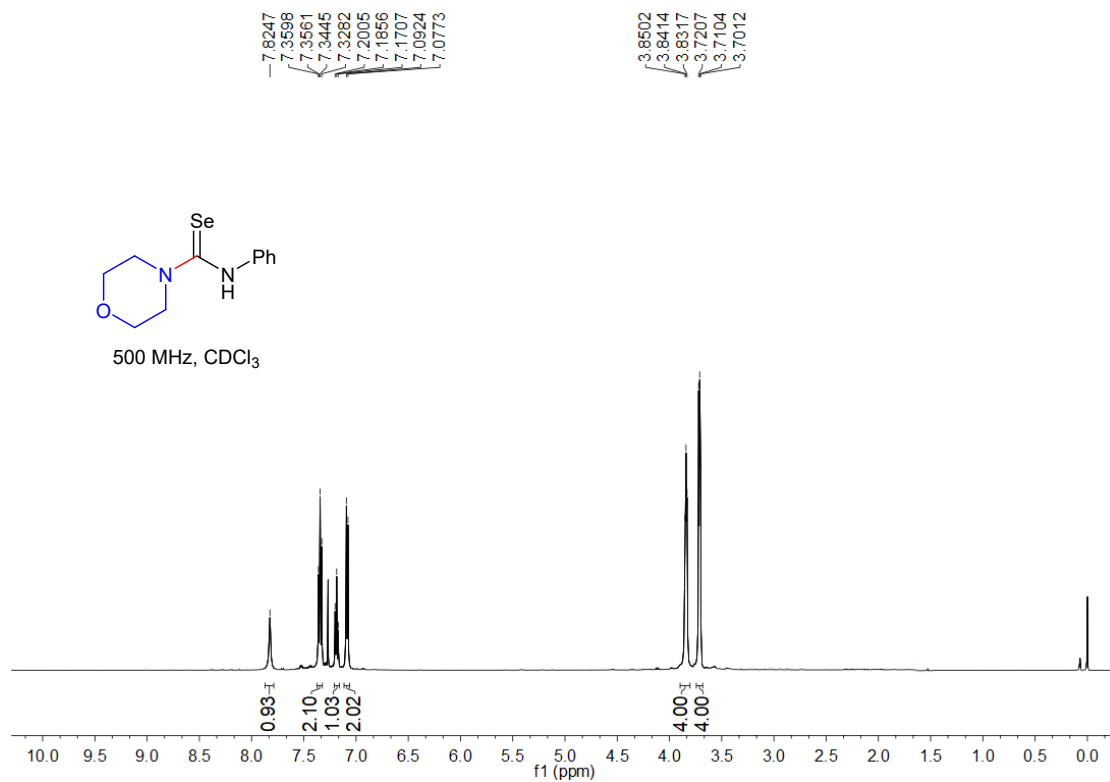

<sup>13</sup>C NMR

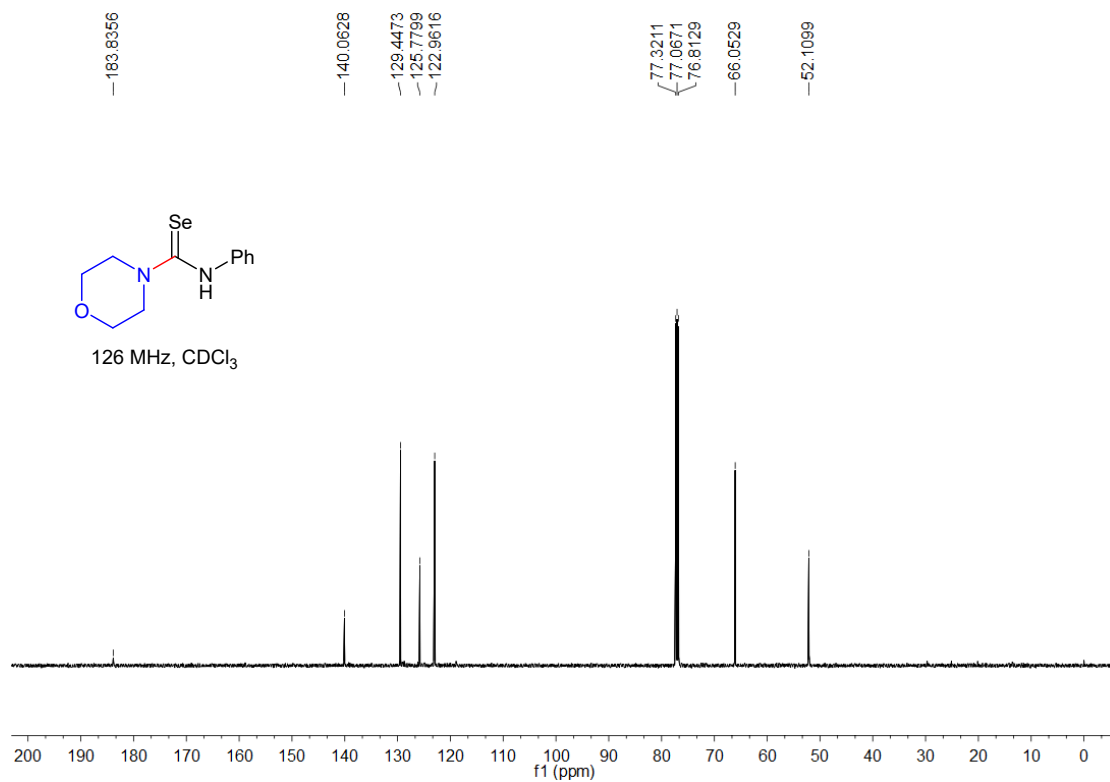

6e

<sup>1</sup>H NMR

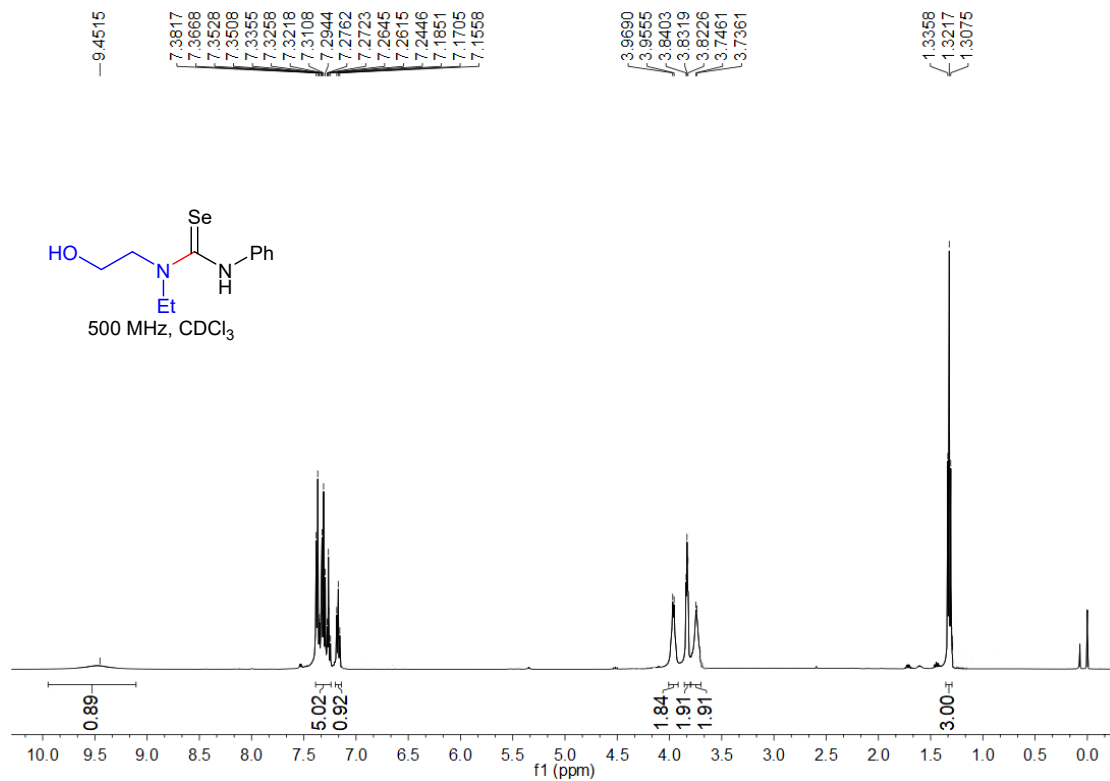

<sup>13</sup>C NMR

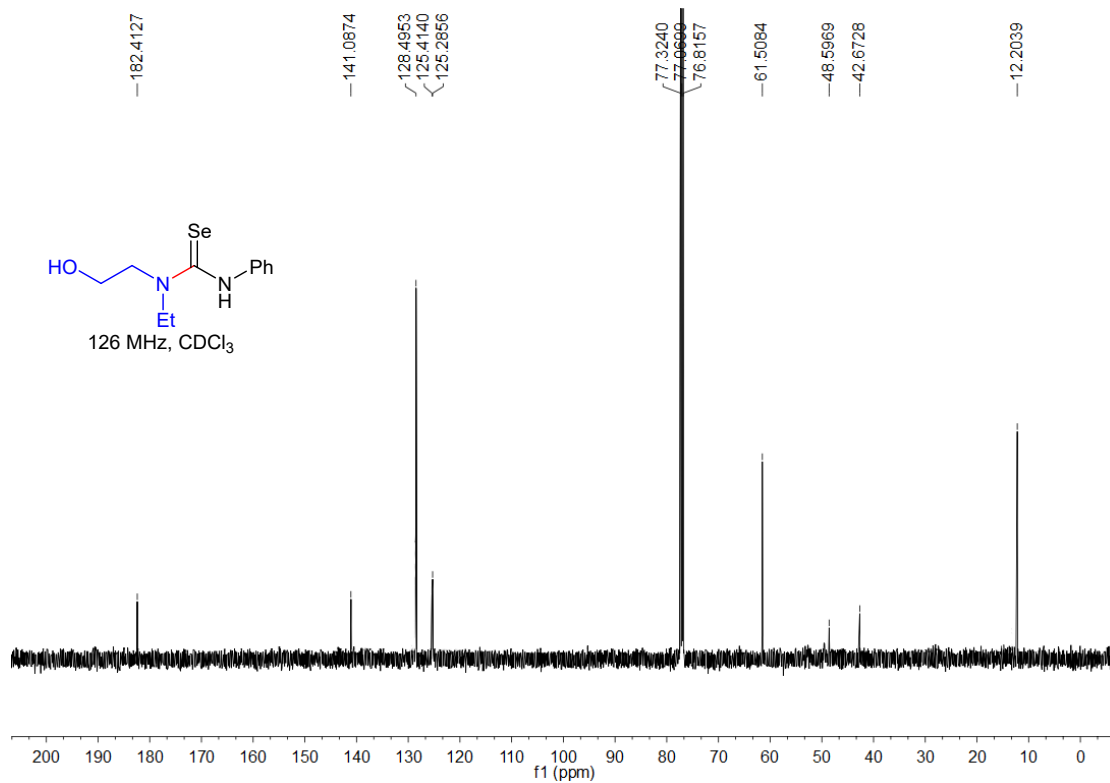

7e

<sup>1</sup>H NMR

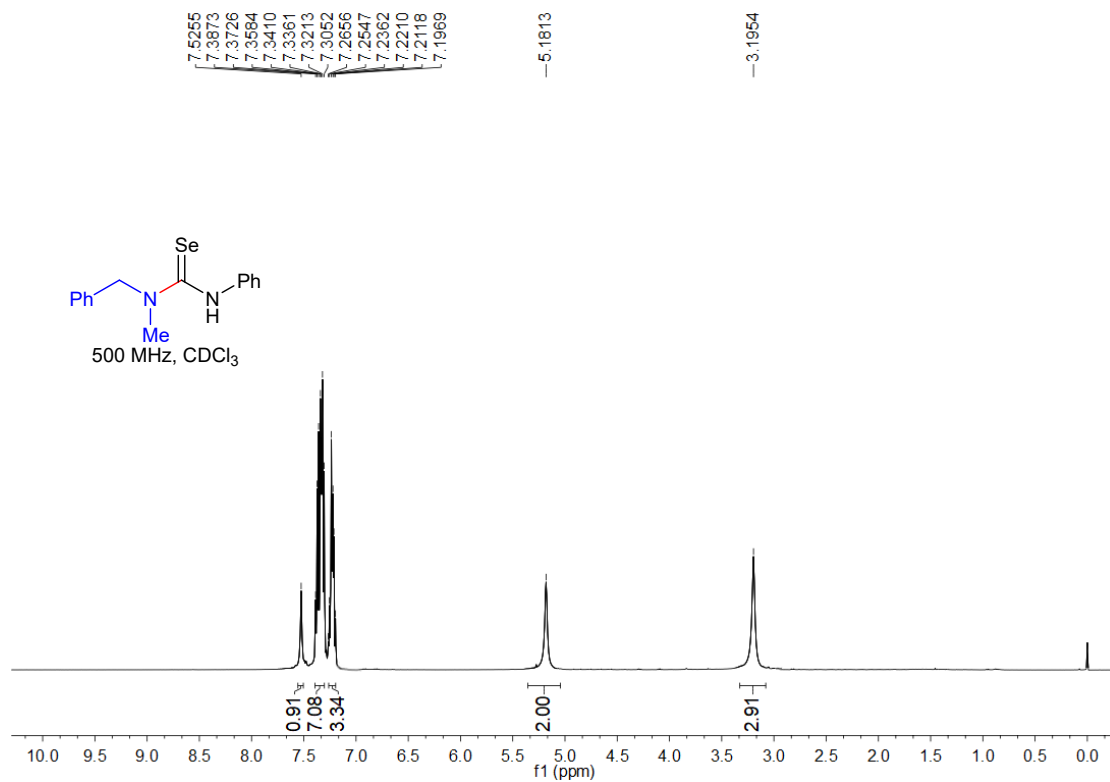

<sup>13</sup>C NMR

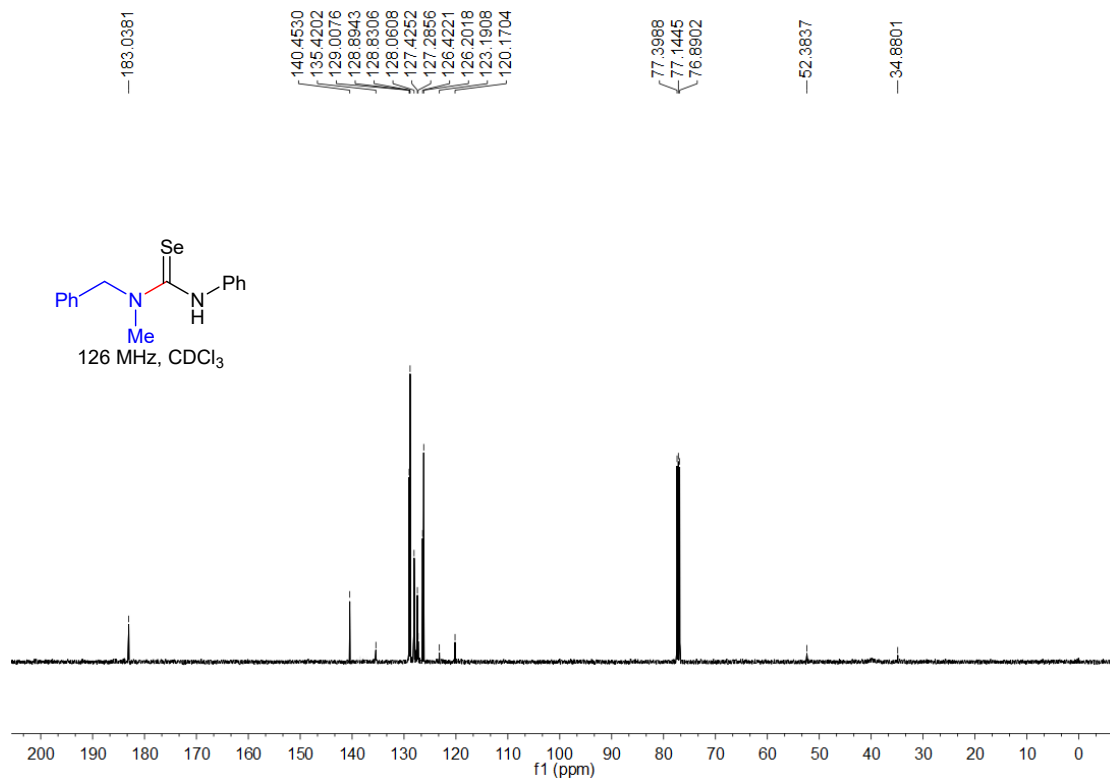

1f

<sup>1</sup>H NMR

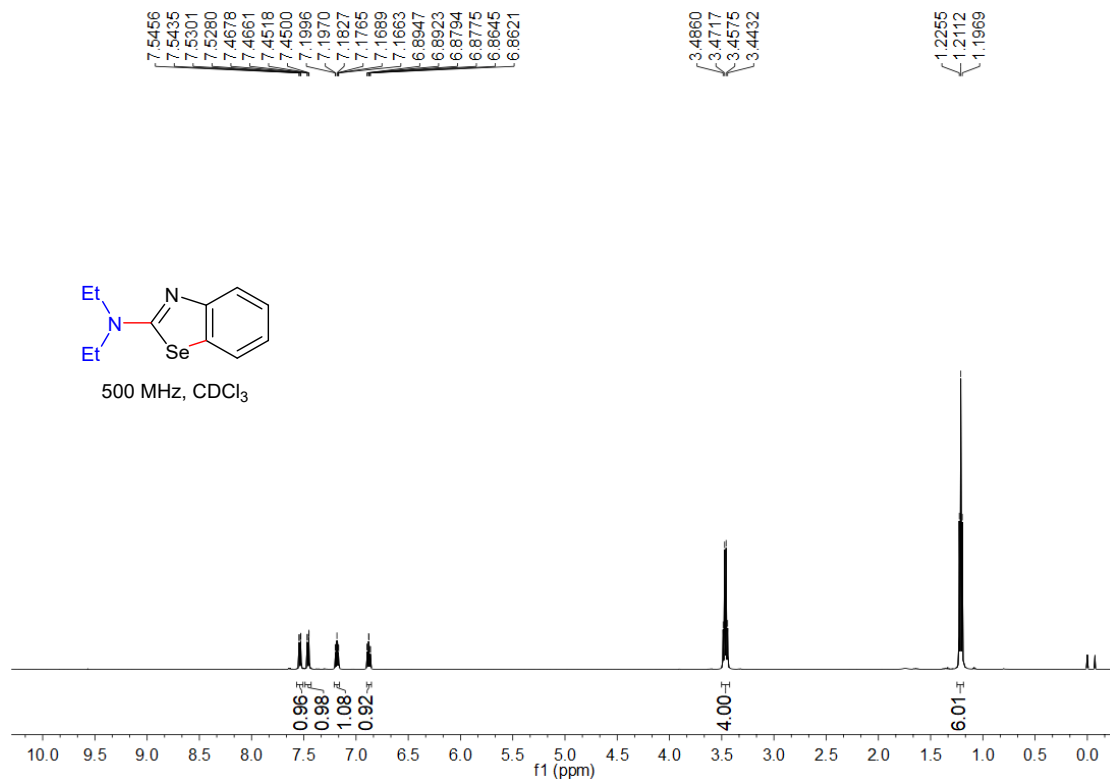

<sup>13</sup>C NMR

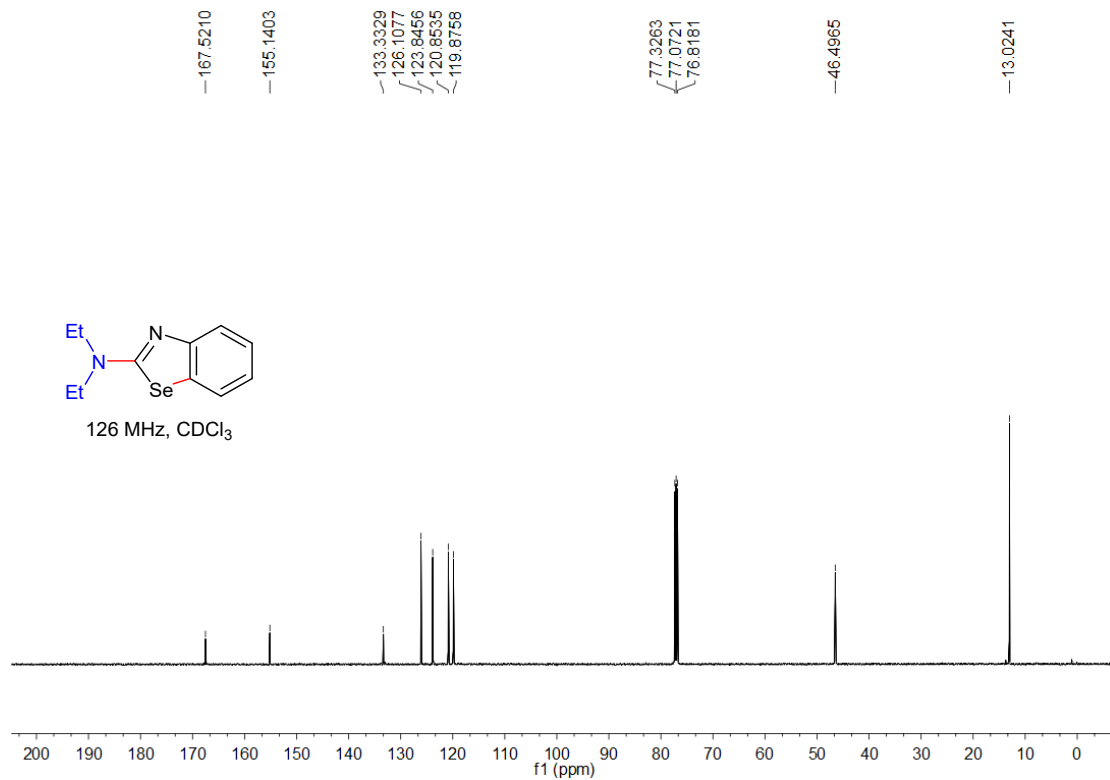

## 2f

<sup>1</sup>H NMR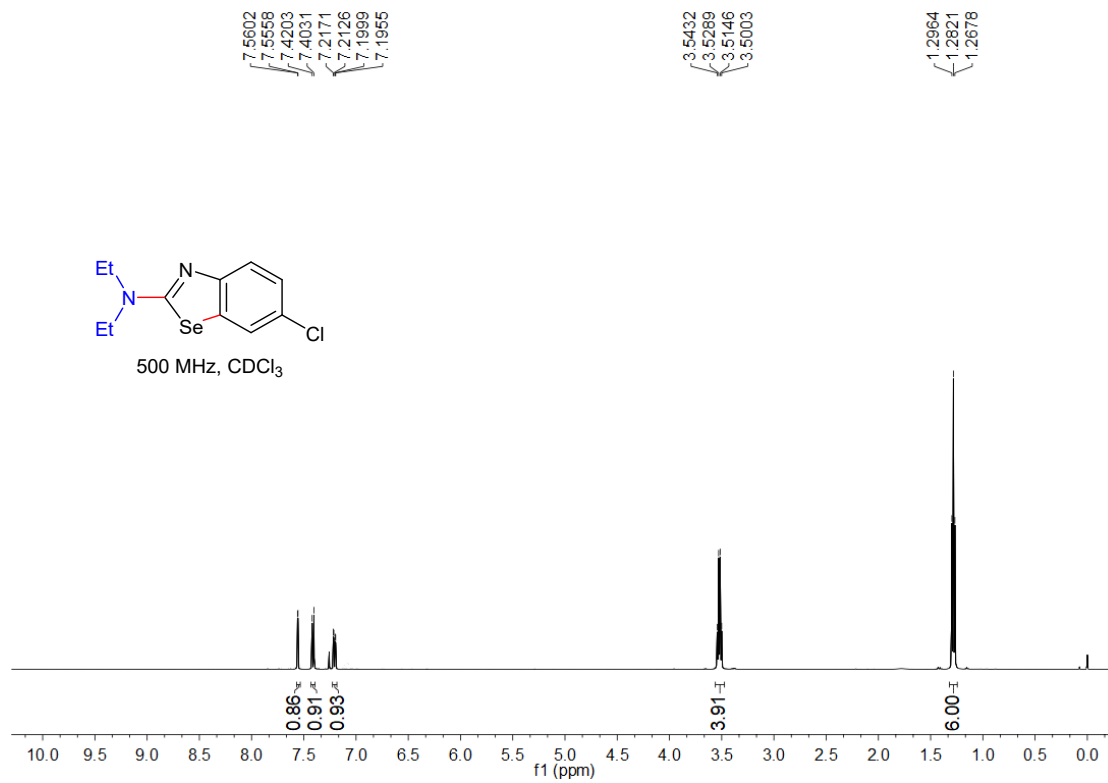<sup>13</sup>C NMR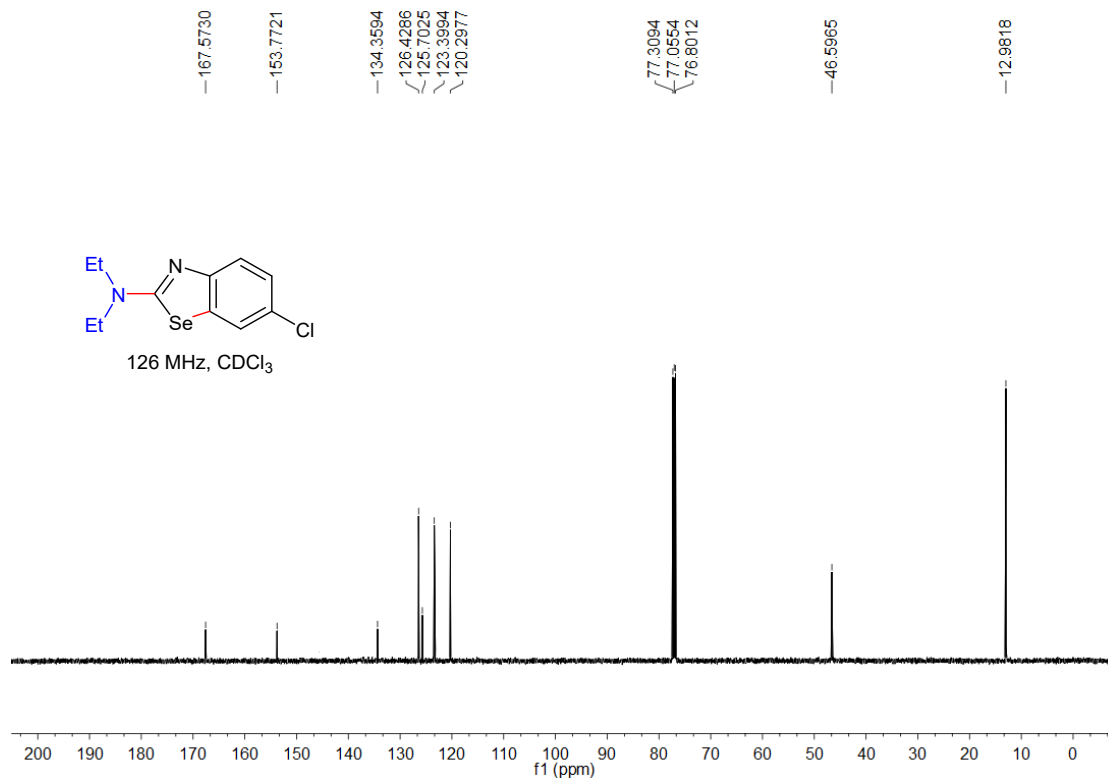

3f

<sup>1</sup>H NMR

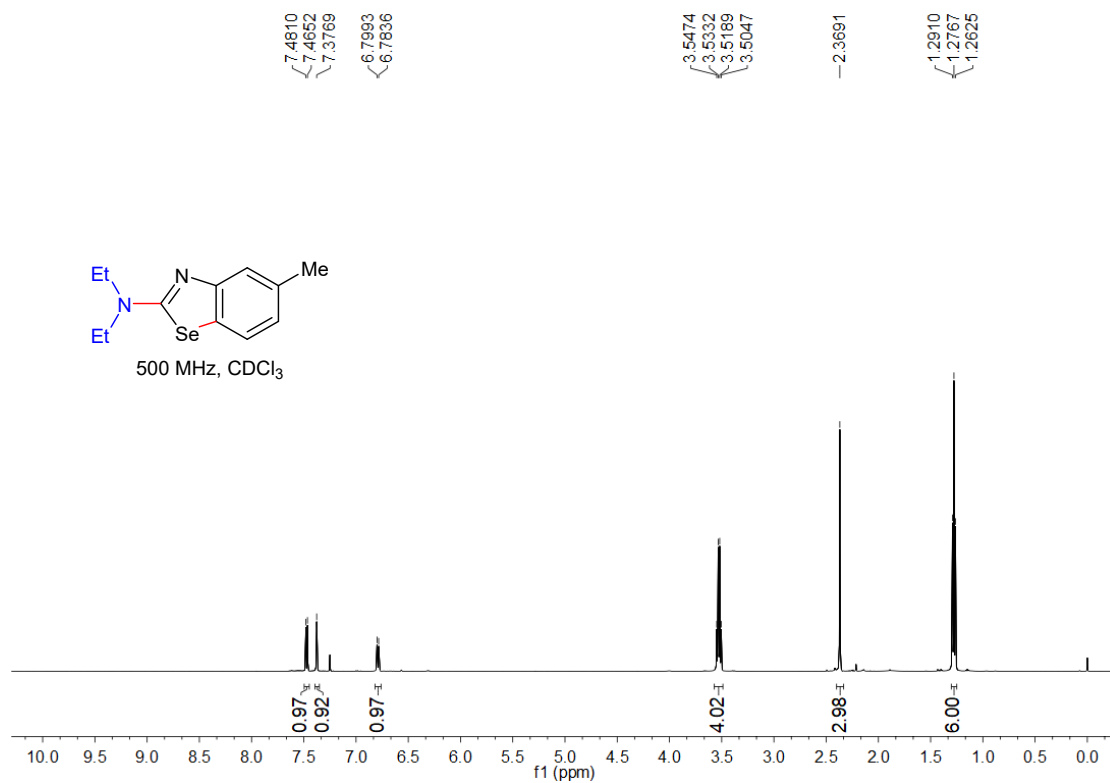

<sup>13</sup>C NMR

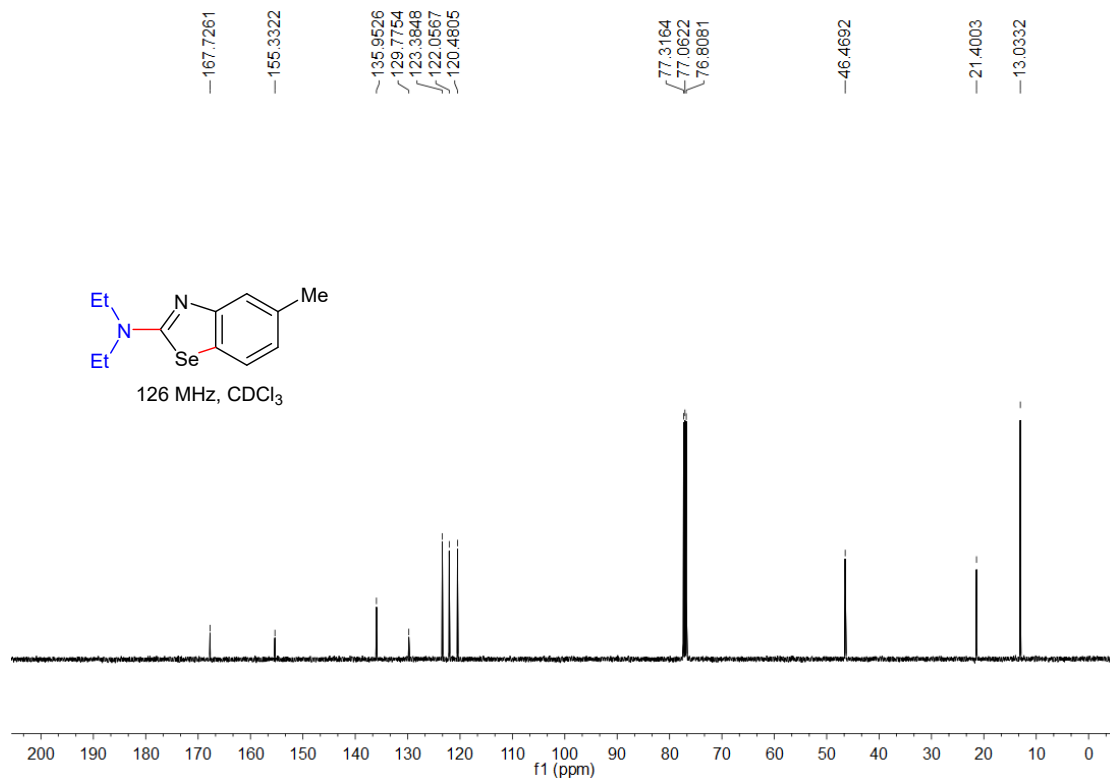



4f

<sup>1</sup>H NMR

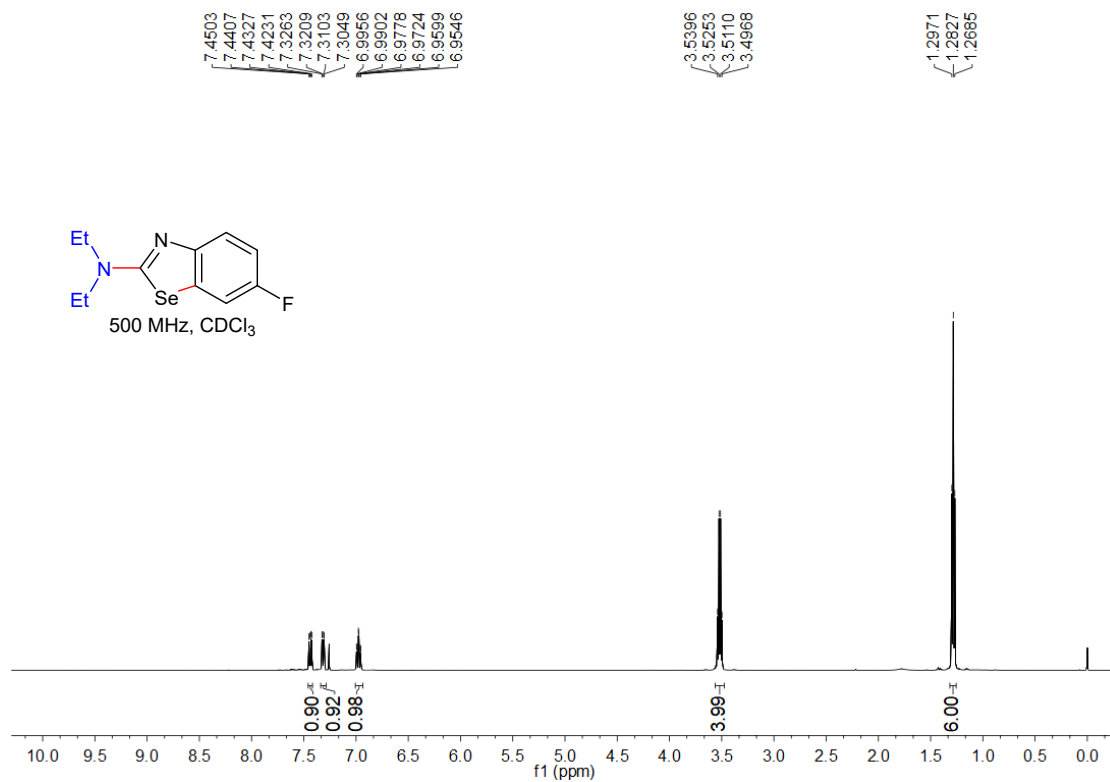

<sup>13</sup>C NMR

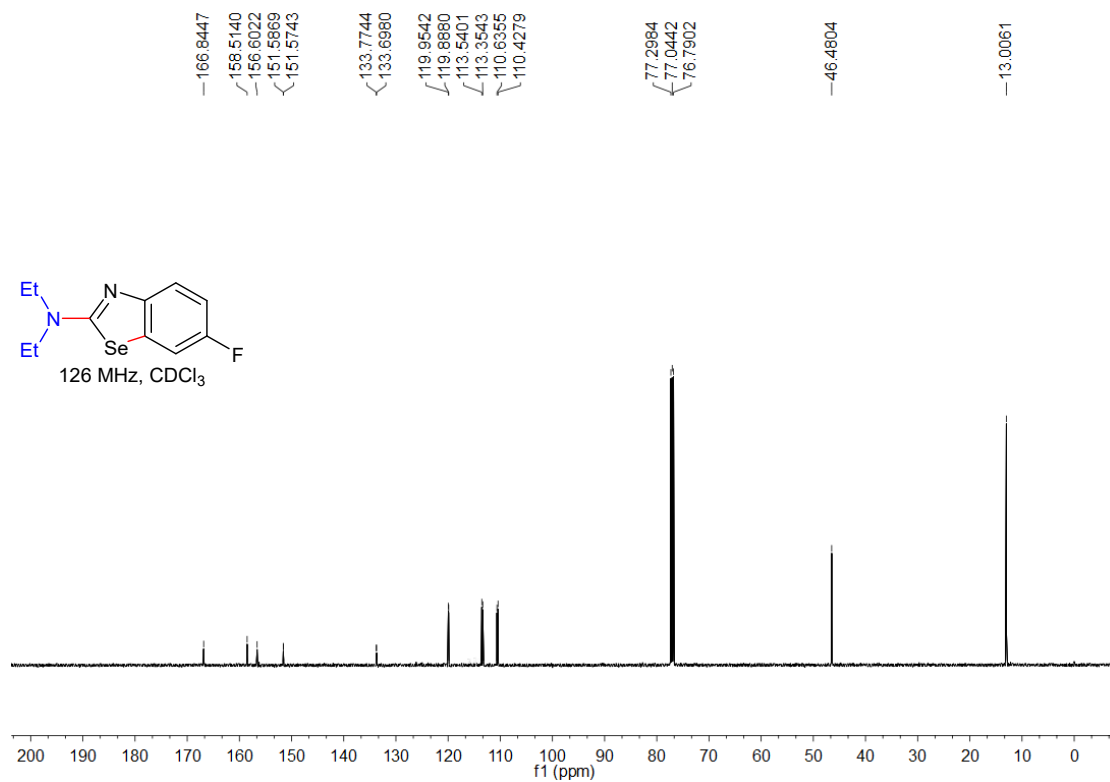

**<sup>19</sup>F NMR**

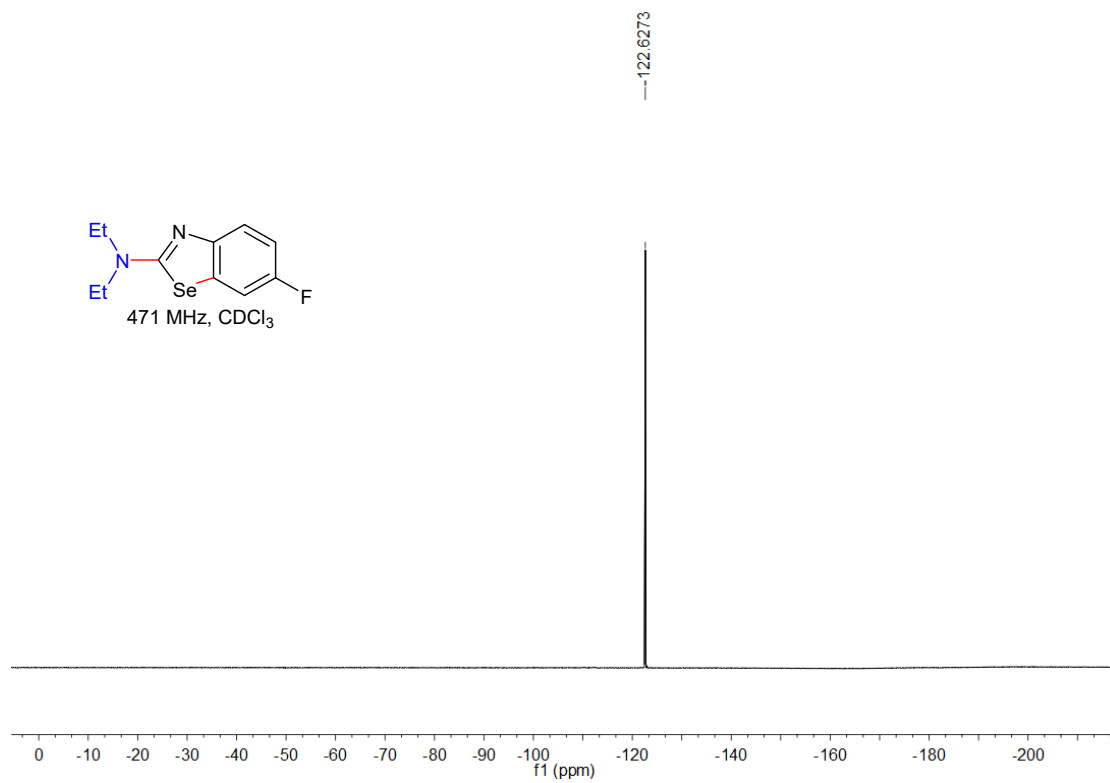

5f

<sup>1</sup>H NMR

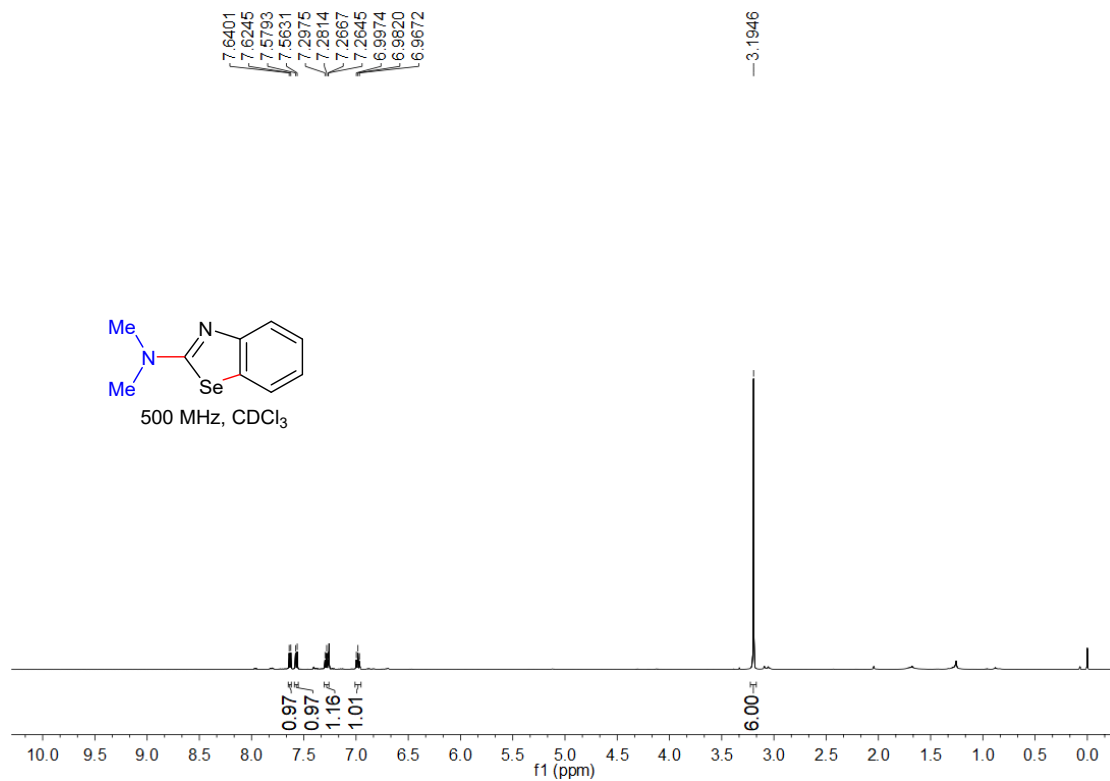

<sup>13</sup>C NMR

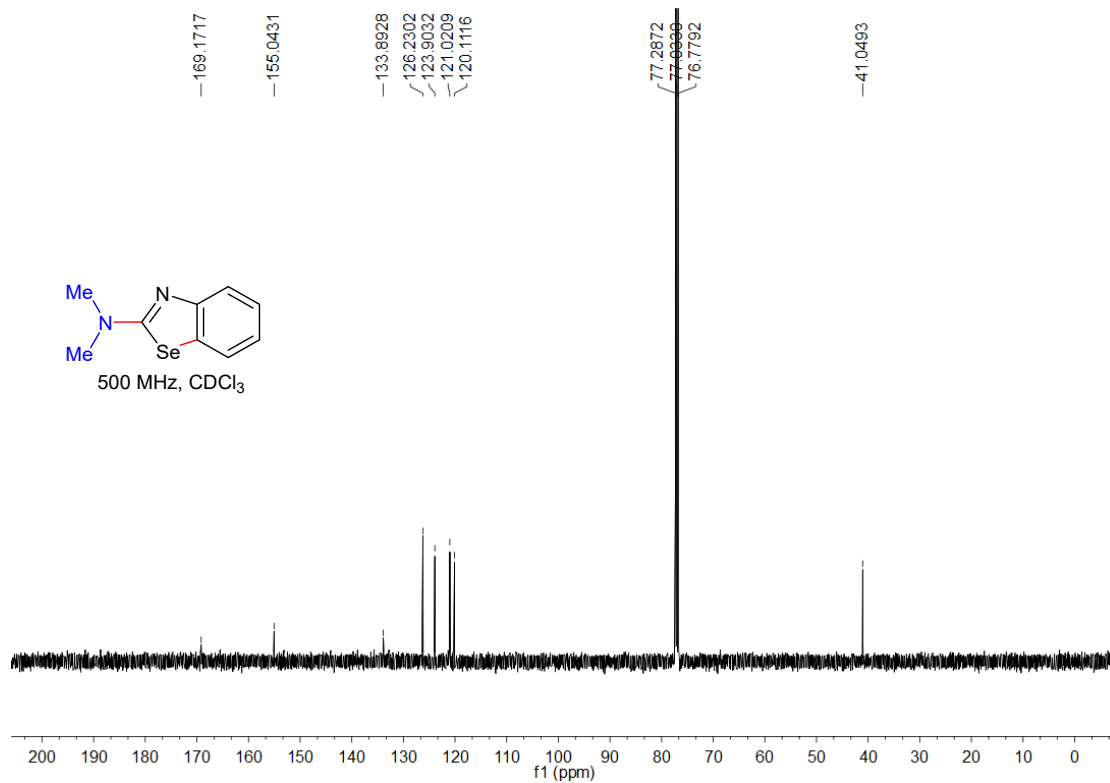

6f

<sup>1</sup>H NMR

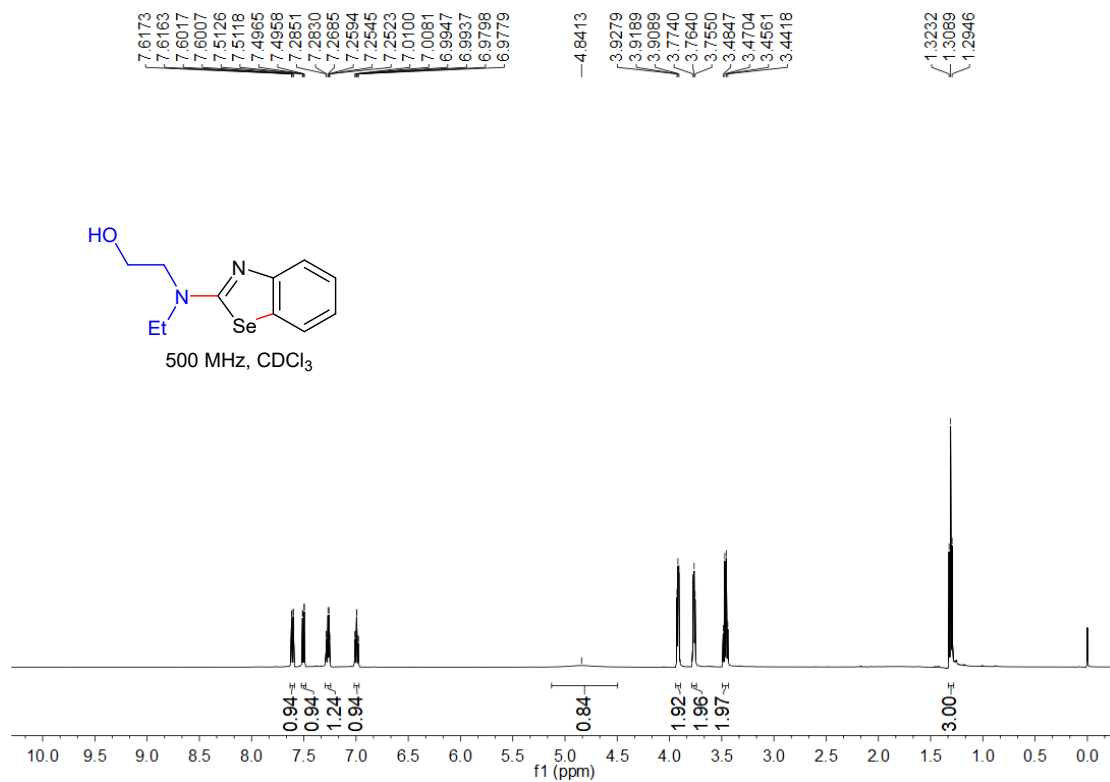

<sup>13</sup>C NMR

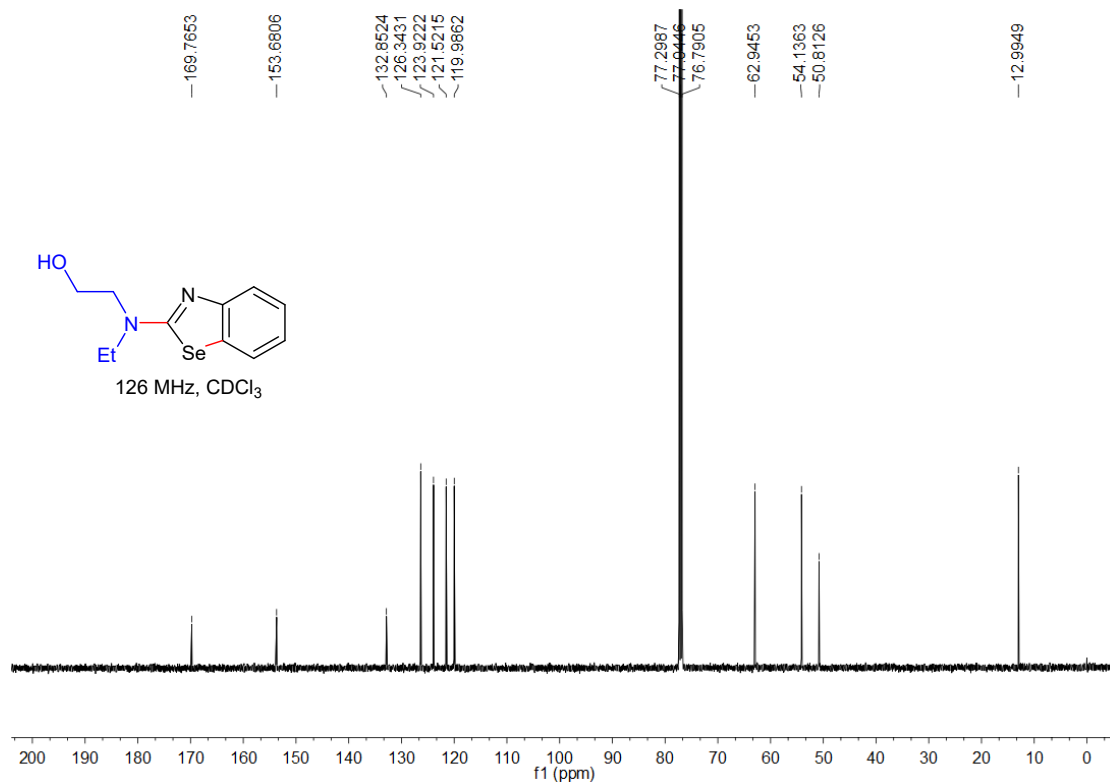

7f

<sup>1</sup>H NMR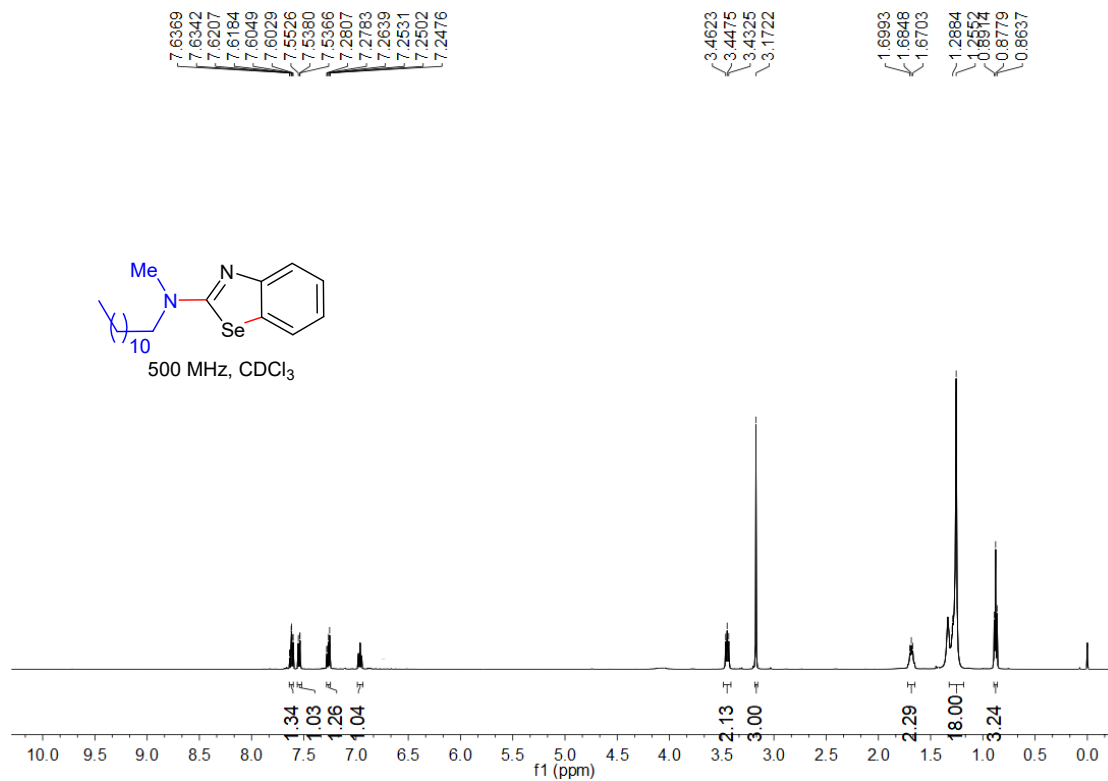<sup>13</sup>C NMR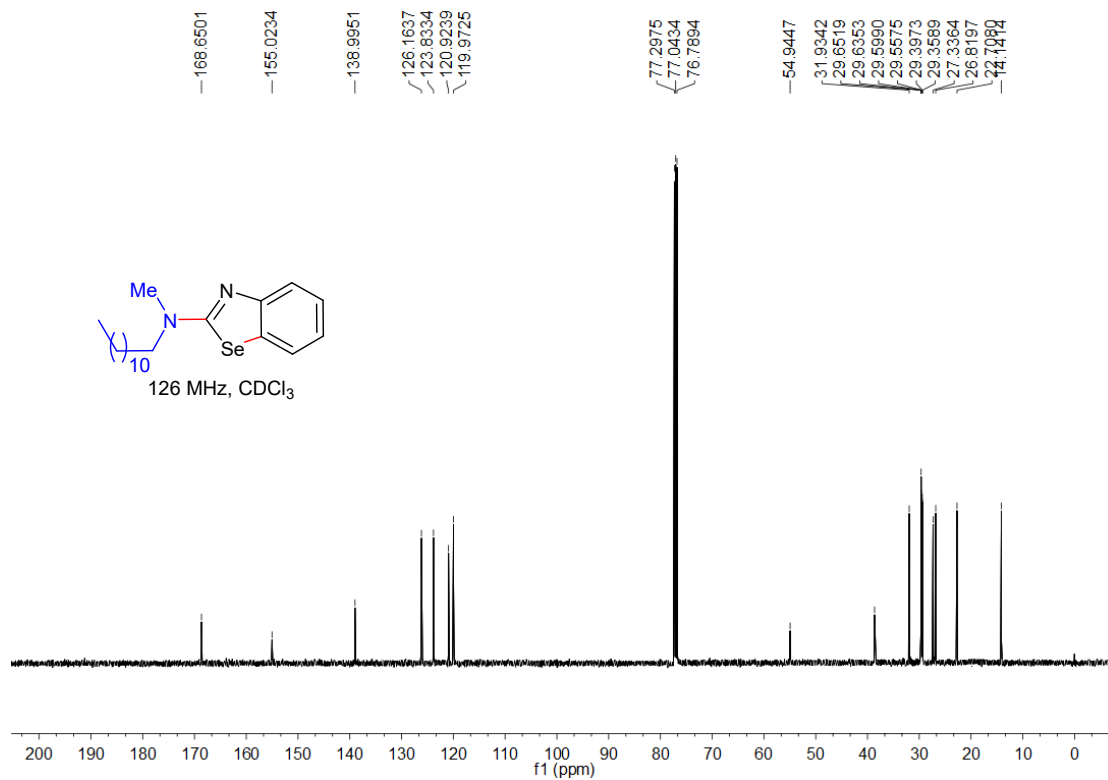

77
